# Supplementary material for: The O-GlcNAc transferase OGT is a conserved and essential regulator of the cellular and organismal response to hypertonic stress
Source: PubMed Central journal article supplement (PMC7556452; doi:10.1371/journal.pgen.1008821), 2020-10-02
Supplement: pgen.1008821.s008.pdf [file pgen.1008821.s008.pdf]

**Table S1 - *ogt-1(dr15)* and *ogt-1(dr20)* genetics are consistent with recessive and single**

| Strain             | Outcross | Number of Nio males from a cross of <i>ogt-1</i> x WT | Number of Nio among self progeny of <i>ogt-1/+</i> |
|--------------------|----------|-------------------------------------------------------|----------------------------------------------------|
| <i>ogt-1(dr15)</i> | #1       | 0/30 (0%)                                             | 8/27 (30%)                                         |
|                    | #2       | 0/20 (0%)                                             | 7/34 (21%)                                         |
|                    | #3       | 0/15 (0%)                                             | 13/65 (20%)                                        |
| <i>ogt-1(dr20)</i> | #1       | 0/20 (0%)                                             | 3/17 (18%)                                         |
|                    | #2       | *                                                     | 7/34 (21%)                                         |
|                    | #3       | 0/20 (0%)                                             | 17/70 (24%)                                        |

\* Data not collected

**gle gene alleles.**
