# Supplementary material for: The O-GlcNAc transferase OGT is a conserved and essential regulator of the cellular and organismal response to hypertonic stress
Source: PubMed Central journal article supplement (PMC7556452; doi:10.1371/journal.pgen.1008821), 2020-10-02
Supplement: pgen.1008821.s009.pdf [file pgen.1008821.s009.pdf]

**Table S2 - All *ogt-1* alleles fail to complement for the Nio phenotype**

|          |               | Mutant A    |             |              |               |
|----------|---------------|-------------|-------------|--------------|---------------|
|          |               | <i>dr15</i> | <i>dr20</i> | <i>ok430</i> | <i>ok1474</i> |
| Mutant B | <i>dr15</i>   | 8/18 (44%)  | 13/31 (42%) | 6/12 (67%)   | 8/20 (40%)    |
|          | <i>dr20</i>   |             | 11/28 (39%) | 9/32 (28%)   | 12/33 (36%)   |
|          | <i>ok430</i>  |             |             | 3/10 (30%)   | 13/27 (48%)   |
|          | <i>ok1474</i> |             |             |              | 14/22 (64%)   |

Number of of animals with a Nio phenotype (no gfp induction on 250 mM NaCl) in the cross progeny of a *ogt-1/+* male to an *ogt-1/ogt-1* hermaphrodite

Complementation = 0%

Non-complementation = ~50%
