# Supplementary material for: The O-GlcNAc transferase OGT is a conserved and essential regulator of the cellular and organismal response to hypertonic stress
Source: PubMed Central journal article supplement (PMC7556452; doi:10.1371/journal.pgen.1008821), 2020-10-02
Supplement: pgen.1008821.s010.pdf [file pgen.1008821.s010.pdf]

**Table S3 - Backcrossing does not substantially reduce the number of SNPs and INDELS in the**

| Strain                             | Number of unique non-synonymous SNPs | Number of unique non-synonymous INDELS |
|------------------------------------|--------------------------------------|----------------------------------------|
| <i>ogt-1(dr15)</i>                 | 377                                  | 72                                     |
| <i>ogt-1(dr20)</i>                 | 467                                  | 77                                     |
| <i>ogt-1(dr20)</i> no backcrossing | 596                                  | 85                                     |

e *ogt-1(dr20)* strain.
