# Supplementary material for: The O-GlcNAc transferase OGT is a conserved and essential regulator of the cellular and organismal response to hypertonic stress
Source: PubMed Central journal article supplement (PMC7556452; doi:10.1371/journal.pgen.1008821), 2020-10-02
Supplement: pgen.1008821.s011.pdf [file pgen.1008821.s011.pdf]

**Table S4 - Strain used in this study**

| <b>Strain</b> | <b>Genotype</b>                                                                                     | <b>Origin</b>                                                                                    |
|---------------|-----------------------------------------------------------------------------------------------------|--------------------------------------------------------------------------------------------------|
| OG119         | <i>drls4</i> [ <i>gpdh-1p::GFP; col-12p::dsRed2</i> ]                                               | This study                                                                                       |
| VP223         | <i>unc-119(ed3);kbls6</i> [ <i>gpdh-1p::gpdh-1-GFP</i> ]                                            | This study                                                                                       |
| OG971         | <i>ogt-1(dr15);drls4</i>                                                                            | This study                                                                                       |
| OG969         | <i>ogt-1(dr20);drls4</i>                                                                            | This study                                                                                       |
| RB653         | <i>ogt-1(ok430)</i>                                                                                 | <i>C. elegans</i> Gene Knockout Consortium (Oklahoma Medical Research Foundation, Oklahoma City) |
| OG1034        | <i>ogt-1(ok430);drls4</i>                                                                           | This study                                                                                       |
| RB1342        | <i>ogt-1(ok1474)</i>                                                                                | <i>C. elegans</i> Gene Knockout Consortium (Oklahoma Medical Research Foundation, Oklahoma City) |
| OG1035        | <i>ogt-1(ok1474);drls4</i>                                                                          | This study                                                                                       |
| OG1066        | <i>ogt-1(dr20 dr36);drls4</i>                                                                       | This study                                                                                       |
| OG1064        | <i>ogt-1(dr34);unc-119(ed3);kbls6</i>                                                               | This study                                                                                       |
| OG1115        | <i>gpdh-1(dr81)</i> [ <i>gpdh1::gfp</i> ]                                                           | This study                                                                                       |
| OG1123        | <i>gpdh-1(dr81);ogt-1(dr84)</i>                                                                     | This study                                                                                       |
| N2 Bristol    | WT                                                                                                  | <i>Caenorhabditis</i> Genetics Center                                                            |
| RB1373        | <i>gpdh-1(ok1558)</i>                                                                               | <i>C. elegans</i> Gene Knockout Consortium (Oklahoma Medical Research Foundation, Oklahoma City) |
| OG1048        | <i>osm-8(dr9);unc-4(e120);drls4</i>                                                                 | This study                                                                                       |
| OG1049        | <i>osm-8(dr9); unc-4(e120);ogt-1(dr20);drls4</i>                                                    | This study                                                                                       |
| OG1111        | <i>ogt-1(dr20);drls4;drEx468</i> [ <i>ogt-1p::ogt-1cDNA::ogt-1 3'utr; rol-6(su1006)</i> ]           | This study                                                                                       |
| OG1119        | <i>ogt-1(dr20);drls4;drEx469</i> [ <i>dpy-7p::ogt-1cDNA::ogt-1 3'utr; rol-6(su1006)</i> ]           | This study                                                                                       |
| OG1120        | <i>ogt-1(dr20);drls4;drEx470</i> [ <i>nhx-2p::ogt-1cDNA::ogt-1 3'utr; rol-6(su1006)</i> ]           | This study                                                                                       |
| OG1121        | <i>ogt-1(dr20);drls4;drEx471</i> [ <i>myo-2p::ogt-1cDNA::ogt-1 3'utr; rol-6(su1006)</i> ]           | This study                                                                                       |
| OG1122        | <i>ogt-1(dr20);drls4;drEx472</i> [ <i>rab-3p::ogt-1cDNA::ogt-1 3'utr; rol-6(su1006)</i> ]           | This study                                                                                       |
| OG1125        | <i>ogt-1(dr20);drls4;drEx473</i> [ <i>ogt1p::humanOGTisoform1cDNA::ogt-1 3'utr; rol-6(su1006)</i> ] | This study                                                                                       |

|        |                                                                                                             |                                                                                                                                                                                                                                   |
|--------|-------------------------------------------------------------------------------------------------------------|-----------------------------------------------------------------------------------------------------------------------------------------------------------------------------------------------------------------------------------|
| OG1126 | <i>ogt-1(dr20);drls4;drEx474</i><br>[ <i>ogt1p::humanOGTisoform1H498AcDNA::ogt-1 3'utr; rol-6(su1006)</i> ] | This study                                                                                                                                                                                                                        |
| OG1046 | <i>ogt-1(dr20);drls4;drEx465</i> [ <i>ogt-1p::ogt-1genomic</i> ]                                            | This study                                                                                                                                                                                                                        |
| TJ375  | <i>gpls1</i> [ <i>hsp16.2p::GFP</i> ]                                                                       | Link, C.D., Cypser, J.R., Johnson, C.J., and Johnson, T.E. (1999). Direct observation of stress response in <i>Caenorhabditis elegans</i> using a reporter transgene. <i>Cell Stress Chaperones</i> 4, 235-242.                   |
| SJ4005 | <i>zcls4</i> [ <i>hsp4::GFP</i> ] V                                                                         | Calfon, M., Zeng, H., Urano, F., Till, J.H., Hubbard, S.R., Harding, H.P., Clark, S.G., and Ron, D. (2002). IRE1 couples endoplasmic reticulum load to secretory capacity by processing the XBP-1 mRNA. <i>Nature</i> 415, 92-96. |
| OG1081 | <i>ogt-1(dr50);zcls4</i>                                                                                    | This study                                                                                                                                                                                                                        |
| MT3643 | <i>osm-11(n1604)</i>                                                                                        | Culotti, J.G., and Russell, R.L. (1978). Osmotic avoidance defective mutants of the nematode <i>Caenorhabditis elegans</i> . <i>Genetics</i> 90, 243-256.                                                                         |
| OG1083 | <i>ogt-1(dr52);osm-11(n1604)</i>                                                                            | This study                                                                                                                                                                                                                        |
| OG1135 | <i>ogt-1(dr86);drls4</i>                                                                                    | This study                                                                                                                                                                                                                        |
| OG1140 | <i>ogt-1(dr90);drls4</i>                                                                                    | This study                                                                                                                                                                                                                        |
| OG1124 | <i>ogt-1(dr84)</i> [ <i>ogt-1::GFP</i> ]                                                                    | This study                                                                                                                                                                                                                        |
| OG1139 | <i>ogt-1(dr84 dr89)</i>                                                                                     | This study                                                                                                                                                                                                                        |
| OG1141 | <i>ogt-1(dr84 dr91)</i>                                                                                     | This study                                                                                                                                                                                                                        |
| OG1156 | <i>ogt-1(dr93);drls4</i>                                                                                    | This study                                                                                                                                                                                                                        |
| OG1157 | <i>ogt-1(dr84 dr94)</i>                                                                                     | This study                                                                                                                                                                                                                        |

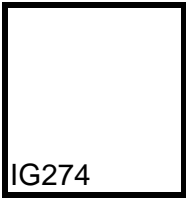

IG274

*frls7 [nlp-29p::GFP + col-12p::dsRed].*

Pujol, N., et al., Distinct innate immune responses to infection and wounding in the *C. elegans* epidermis. *Curr Biol*, 2008. 18(7): p. 481-9.
