# Supplementary material for: The O-GlcNAc transferase OGT is a conserved and essential regulator of the cellular and organismal response to hypertonic stress
Source: PubMed Central journal article supplement (PMC7556452; doi:10.1371/journal.pgen.1008821), 2020-10-02
Supplement: pgen.1008821.s012.pdf [file pgen.1008821.s012.pdf]

**Table S5 - DNA oligos used in this study**

| Primer name | sequence (5' – 3')                                                                                                                                            | target             |
|-------------|---------------------------------------------------------------------------------------------------------------------------------------------------------------|--------------------|
| OG1565      | ACGGAAATTGGTACAAATTG TGG                                                                                                                                      | <i>ogt-1(dr20)</i> |
| OG1566      | TCCCGGATGCATACTGTAATC                                                                                                                                         | <i>ogt-1(dr20)</i> |
| OG1567      | CCAAGCATTGGAACATGAACC                                                                                                                                         | <i>ogt-1(dr20)</i> |
| OG1568      | GACAGCTCTCAAGCTGAAACCAG                                                                                                                                       | <i>ogt-1(dr20)</i> |
| OG1569      | GATCAGCGTGGATGAGTGGTGTC                                                                                                                                       | <i>ogt-1(dr20)</i> |
| OG1570      | TATGATAAACGAGTACGGAAATTGGTACA<br>AATTGT CGAAGATC<br>AGCTTTGCAAGAAACGTCTTCCATCGGTT<br>CATCCA                                                                   | <i>ogt-1(dr20)</i> |
| OG1571      | TATGATAAACGAGTACGGAAATTGGTACA<br>AATTGT CGAAGATT<br>AGCTTTGCAAGAAACGTCTTCCATCGGTT<br>CATCCA                                                                   | <i>ogt-1</i>       |
| OG1544      | ACTATCACTTA ATCATACTC TGG                                                                                                                                     | <i>gpdh-1</i>      |
| OG1546      | ATGAGTAAAGGAGAAGAACT                                                                                                                                          | pPD95.75           |
| OG1547      | TTTGTATAGTTCATCCATGC                                                                                                                                          | pPD95.75           |
| OG1548      | CTGGAGATCAATGAAATCTCGGAAAAGTT<br>CCCAATCTTCGCGTCAGTGCATAAGGTGT<br>TCACCGGGCACCCACGGAGAGCAGGAGCT<br>CTATGATTCCCTGAGAAACCATCCGGAAT<br>ACGACATGAGTAAAGGAGAAGAACT | pPD95.75           |

|        |                                                                                                                                                              |               |
|--------|--------------------------------------------------------------------------------------------------------------------------------------------------------------|---------------|
| OG1549 | AAAATTGTACAATATACATACATAAATACC<br>AGTAAAAAAGATTCAAAAACACGTGTTTTT<br>TCTTTATATCCGCTAGATCCATTTCCAGC<br>TCGTCAATAAAACACATAAAACTATCACTT<br>ATTTGTATAGTTCATCCATGC | pPD95.75      |
| OG1708 | TCAGTGCATAAGGTGTTACCCG                                                                                                                                       | <i>gpdh-1</i> |
| OG1709 | CTTTATATCCGCTAGATCCAT                                                                                                                                        | <i>gpdh-1</i> |
| OG1710 | CTCGGAAAAGTTCCCAATCTTC                                                                                                                                       | <i>gpdh-1</i> |
| OG1711 | CCAGTAAAAAAGATTCAAAAACACG                                                                                                                                    | <i>gpdh-1</i> |
| OG1664 | GCTTGTGAATAGATTTTCGA AGG                                                                                                                                     | <i>ogt-1</i>  |
| OG1665 | ATATCACTAATAATACGGAAACGCCACAC<br>GGCTTGATGAGTAAAGGAGAAGAACTTTT<br>C                                                                                          | pPD95.75      |
| OG1666 | GAAATTATACAAAATATACAATTTTTTAA<br>AAATCGTTCGAAAATCTATTCATTTGTATA<br>GTTTCATCCATGCCATG                                                                         | pPD95.75      |
| OG1667 | CTCACAGAGGTTCAACATTTTTTCC                                                                                                                                    | <i>ogt-1</i>  |
| OG1668 | GAGCACTGAGGAGTAATACG                                                                                                                                         | <i>ogt-1</i>  |
| OG1669 | TTTCAGCTTGGCGAACATGCGT                                                                                                                                       | <i>ogt-1</i>  |
| OG1670 | GGTTTCCAATATGGAAAATC                                                                                                                                         | <i>ogt-1</i>  |
| OG1746 | CTTGCCAGCATAACACAAGGATGC                                                                                                                                     | <i>ogt-1</i>  |
| OG1747 | ATATGGCAGAAGCTATTCAAAG                                                                                                                                       | <i>ogt-1</i>  |
| OG1748 | CCAAGCATTTGAACATGAACCTG                                                                                                                                      | <i>ogt-1</i>  |
| OG1749 | TCGATCAGCGTGGATGAGTGGTG                                                                                                                                      | <i>ogt-1</i>  |

|        |                                                                                                                      |              |
|--------|----------------------------------------------------------------------------------------------------------------------|--------------|
| OG1770 | GGATAAAGCATACTGTGATG TGG                                                                                             | <i>ogt-1</i> |
| OG1771 | ATTGTGGAAGATCAGCTTTGCAAGAAACG<br>TCTTCCCTCAGTTCATCCAGCTCATTCTA<br>TGCTCTACCCGCTTTCACATGCGGCTCG<br>GATTGCAATTGCTGCAAA | <i>ogt-1</i> |
| OG1774 | CAGAAGTAGTAAGTGGACCCAAC                                                                                              | <i>ogt-1</i> |
| OG1775 | CCAATCAAGCAAATGATCATG                                                                                                | <i>ogt-1</i> |
| OG1776 | AAGCCAAAGAATTGATTTCCGG                                                                                               | <i>ogt-1</i> |
| OG1777 | CCTCTCTCTACACAATACTTTCCG                                                                                             | <i>ogt-1</i> |
| OG1772 | ATCCACATGTCGAGAGTCGA TGG                                                                                             | <i>ogt-1</i> |

|        |                                                                                                           |                          |
|--------|-----------------------------------------------------------------------------------------------------------|--------------------------|
| OG1773 | atgctattgtgtttgcaattcaatcagctttacATGattgatc<br>catctacctagatatgtggattaaaattctcgagaatgtccg<br>aatcaattcttg | <i>ogt-1</i>             |
| OG1807 | tacagaaaagtcactgaat tgg                                                                                   | <i>ogt-1</i>             |
| OG1808 | gtcatcaaataattgtgat tgg                                                                                   | <i>ogt-1</i>             |
| OG1806 | gaacaattgaaaatataaattggtttacagaaaa<br>aatgattatgataaacgagtacggaattgtaca                                   | <i>ogt-1</i>             |
| OG1814 | actctgaaccgttagtcctc                                                                                      | <i>ogt-1</i>             |
| OG1815 | ccatcattcacagaaagtgc                                                                                      | <i>ogt-1</i>             |
| OG1816 | ctttgaaccgcatagaaca                                                                                       | <i>ogt-1</i>             |
| OG1817 | tccattgcatggaatctgcg                                                                                      | <i>ogt-1</i>             |
| OG1818 | agctgaaaccagatttcccg                                                                                      | <i>ogt-1</i>             |
| OG1487 | AAAGTGGGGGGAGTTGAGAGT                                                                                     | <i>ogt-1</i>             |
| OG1488 | AAAATTTGTGTAGTGTTTT                                                                                       | <i>ogt-1</i>             |
| OG1649 | TCTAAATACACTCACGTGACGCGTGGATC<br>CC                                                                       | pPD61.125                |
| OG1650 | CTCCCCCACTTTGGCTAGCCATGGAAC<br>CGG                                                                        | pPD61.125                |
| OG1651 | CCATGGCTAGCCAAAGTGGGGGGAGTTG<br>AG                                                                        | <i>ogt-1</i><br>promoter |
| OG1652 | ATTGGGCTTCTCCATCGTCTAATCCATTC<br>GATATAATTC                                                               | <i>ogt-1</i><br>promoter |
| OG1653 | GGATTAGACGATGGAGAAGCCCAATTAC<br>TTTCAGTC                                                                  | <i>ogt-1</i> cDNA        |
| OG1654 | GAAATCTATTCACAAGCCGTGTGGCGTT<br>TC                                                                        | <i>ogt-1</i> cDNA        |

|        |                                                  |                                                |
|--------|--------------------------------------------------|------------------------------------------------|
| OG1655 | CCACACGGCTTGTGAATAGATTTTCGAAG<br>GATTTTTAAAAATTG | <i>ogt-1</i> 3'utr                             |
| OG1656 | CACGCGTCACGTGAGTGTATTTAGACGA<br>GATTC            | <i>ogt-1</i> 3'utr                             |
| OG1680 | CAGATAAATGGAGAAGCCCAATTACTTTC<br>AGTCG           | <i>ogt-1p::ogt-1</i> cDNA:: <i>ogt-1</i> 3'utr |
| OG1681 | TTGGTAGGGAGGCTAGCCATGGAACCGG                     | <i>ogt-1p::ogt-1</i> cDNA:: <i>ogt-1</i> 3'utr |
| OG1682 | ATGGCTAGCCTCCCTACCAATTGAAAATT<br>C               | <i>dpy-7</i> promoter                          |
| OG1683 | TGGGCTTCTCCATTTATCTGGAACAAAT<br>GTAAG            | <i>dpy-7</i> promoter                          |
| OG1684 | TTAAATCATGGAGAAGCCCAATTACTTTC<br>AGTCG           | <i>ogt-1p::ogt-1</i> cDNA:: <i>ogt-1</i> 3'utr |
| OG1685 | TTTATTCAACGGCTAGCCATGGAACCGG                     | <i>ogt-1p::ogt-1</i> cDNA:: <i>ogt-1</i> 3'utr |
| OG1686 | ATGGCTAGCCGTTGAATAAACGCTTAGTC                    | <i>nhx-2</i> promoter                          |
| OG1687 | TGGGCTTCTCCATGATTTAATCACTGAAA<br>ATTATTTTC       | <i>nhx-2</i> promoter                          |
| OG1692 | CCATCTAGAAATGGAGAAGCCCAATTACT<br>TTCAG           | <i>ogt-1p::ogt-1</i> cDNA:: <i>ogt-1</i> 3'utr |
| OG1693 | cggccagaccGGCTAGCCATGGAACCGG                     | <i>ogt-1p::ogt-1</i> cDNA:: <i>ogt-1</i> 3'utr |
| OG1694 | atggctagccGGTCTGGCCGCAAAAAGG                     | <i>myo-3p</i>                                  |
| OG1695 | GCTTCTCCATTTCTAGATGGATCTAGTGG<br>TCG             | <i>myo-3p</i>                                  |
| OG1696 | GAAGAAGACCATGGAGAAGCCCAATTAC<br>TTTCAG           | <i>ogt-1p::ogt-1</i> cDNA:: <i>ogt-1</i> 3'utr |

|        |                                                  |                                        |
|--------|--------------------------------------------------|----------------------------------------|
| OG1697 | AAGATGCACTGGCTAGCCATGGAACCGG                     | <i>ogt-1p::ogt-1 cDNA::ogt-1 3'utr</i> |
| OG1698 | ATGGCTAGCCAGTGCATCTTCTTTTGAGA<br>ATTC            | <i>rab-3p</i>                          |
| OG1699 | GCTTCTCCATGGTCTTCTTCGTTTCCGC                     | <i>rab-3p</i>                          |
| OG1700 | TTAGACGATGGCGTCTTCCGTGGGCAAC                     | human <i>ogt</i><br>isoform 1          |
| OG1701 | AATCTATTCATGCTGACTCAGTGACTTCA<br>ACAG            | human <i>ogt</i><br>isoform1           |
| OG1702 | TGAGTCAGCATGAATAGATTTTTCGAAGGA<br>TTTTTAAAAAATTG | <i>ogt-1p::ogt-1 cDNA::ogt-1 3'utr</i> |
| OG1703 | CGGAAGACGCCATCGTCTAATCCATTCCG                    | <i>ogt-1p::ogt-1 cDNA::ogt-1 3'utr</i> |
| OG535  | CCCAATCCAAGAGAGGTATCCTT                          | <i>act-2</i>                           |
| OG536  | GAAGCTCGTTGTAGAAAGTGTGATG                        | <i>act-2</i>                           |
| OG592  | TGCAGAGATTCCAGGAAACCAGG                          | <i>gpdh-1</i>                          |
| OG593  | CCCTTTTGTAGCTTGCCACGGAG                          | <i>gpdh-1</i>                          |
| OG876  | CCATTGAAGAGGTAGAAATGC                            | <i>hmit-1.1</i>                        |
| OG877  | TGTACTTCATTGTGTTGTCC                             | <i>hmit-1.1</i>                        |
| OG878  | GAGGATATGGAAGAGGATATGG                           | <i>nlp-29</i>                          |
| OG879  | GTATCCTCCGTACATTCCAC                             | <i>nlp-29</i>                          |
| OG1342 | TACCTGTTCCATGGCCAACACTTGTC                       | <i>GFP</i>                             |
| OG1343 | CTTTCCTGTACATAACCTTCGGGC                         | <i>GFP</i>                             |

**Purpose**

guide RNA for CRISPR/Cas9 conversion of the *dr20* SNP back to WT and the addition of the *dr20* SNP

inner nested *dr20* genotyping forward primer

inner nested *dr20* genotyping reverse primer

outer nested *dr20* genotyping outer nested forward primer

outer nested *dr20* genotyping reverse primer

ssODN repair template for CRISPR/Cas9 conversion of the *dr20* SNP back to WT

ssODN repair template for CRISPR/Cas9 addition of the *dr20* SNP

guide RNA for CRISPR/Cas9 C-terminal addition of GFP

amplification of GFP for CRISPR/Cas9 C-terminal addition of GFP to *gpdh-1*

amplification of GFP for CRISPR/Cas9 C-terminal addition of GFP to *gpdh-1*

forward primer used to amplify GFP for CRISPR/Cas9 C-terminal *gpdh-1* insertion of GFP, includes 120 bp homology overhangs to site of insertion

reverse primer used to amplify GFP for CRISPR/Cas9 C-terminal *gpdh-1* insertion of GFP, includes 120 bp homology overhangs to site of insertion

inner nested *gpdh-1::GFP* genotyping forward primer

inner nested *gpdh-1::GFP* genotyping reverse primer

outer nested *gpdh-1::GFP* genotyping forward primer

outer nested *gpdh-1::GFP* genotyping reverse primer

guide RNA for CRISPR/Cas9 C-terminal addition of GFP

5' Sp9-modified forward primer used to amplify GFP for CRISPR/Cas9 C-terminal *ogt-1* insertion of GFP, includes 35 bp homology overhangs to site of insertion

5' Sp9-modified reverse primer used to amplify GFP for CRISPR/Cas9 C-terminal *ogt-1* insertion of GFP, includes 35 bp homology overhangs to site of insertion

outer nested *ogt-1::GFP* genotyping forward primer

outer nested *ogt-1::GFP* genotyping reverse primer

inner nested *ogt-1::GFP* genotyping forward primer

inner nested *ogt-1::GFP* genotyping reverse primer

outer nested OGT-1 H612A genotyping forward primer

inner nested OGT-1 H612A genotyping forward primer

inner nested OGT-1 H612A genotyping reverse primer

outer nested OGT-1 H612A genotyping reverse primer



guide RNA for CRISPR/Cas9  
conversion of the OGT-1  
H612A SNP

ssODN repair template for  
CRISPR/Cas9 conversion of  
the OGT-1 H612A SNP

outer nested OGT-1 K957M  
genotyping forward primer

inner nested OGT-1 K957M  
genotyping forward primer

inner nested OGT-1 K957M  
genotyping reverse primer

outer nested OGT-1 K957M  
genotyping reverse primer

guide RNA for CRISPR/Cas9  
conversion of the OGT-1  
K957M SNP

ssODN repair template for  
CRISPR/Cas9 conversion of  
the OGT-1 K957M SNP

guide RNA #1 for  
CRISPR/Cas9 deletion of the  
TPR domain

guide RNA #2 for  
CRISPR/Cas9 deletion of the  
TPR domain

ssODN repair template for  
CRISPR/Cas9 deletion of the  
TPR domain

inner nested OGT-1  $\Delta$ TPR  
genotyping forward primer

inner nested OGT-1  $\Delta$ TPR  
genotyping reverse primer

outer nested OGT-1  $\Delta$ TPR  
genotyping forward primer

outer nested OGT-1  $\Delta$ TPR  
genotyping reverse primer

internal deletion OGT-1  $\Delta$ TPR  
genotyping forward primer

forward primer for genomic  
*ogt-1*

reverse primer for genomic  
*ogt-1*

forward primer for Gibson  
assembly

Gibson assembly reverse  
primer

Gibson assembly forward  
primer for *ogt-1* promoter

Gibson assembly reverse  
primer for *ogt-1* promoter

Gibson assembly forward  
primer for *ogt-1* cDNA

Gibson assembly reverse  
primer for *ogt-1* cDNA

Gibson assembly forward primer for *ogt-1* 3'utr

Gibson assembly reverse primer for *ogt-1* 3'utr

Gibson assembly forward primer for *dpy-7p* backbone

Gibson assembly reverse primer for *dpy-7p* backbone

Gibson assembly forward primer for *dpy-7p*

Gibson assembly reverse primer for *dpy-7p*

Gibson assembly forward primer for *nhx-2p* backbone

Gibson assembly reverse primer for *nhx-2p* backbone

Gibson assembly forward primer for *nhx-2p*

Gibson assembly reverse primer for *nhx-2p*

Gibson assembly forward primer for *myo-3p* backbone

Gibson assembly reverse primer for *myo-3p* backbone

Gibson assembly forward primer for *myo-3p*

Gibson assembly reverse primer for *myo-3p*

Gibson assembly forward primer for *rab-3p* backbone

Gibson assembly reverse primer for *rab-3p* backbone

Gibson assembly forward primer for *rab-3p*

Gibson assembly reverse primer for *rab-3p*

Gibson assembly forward primer for human *ogt-1*

Gibson assembly reverse primer for human *ogt-1*

Gibson assembly forward primer for human *ogt* backbone

Gibson assembly reverse primer for human *ogt* backbone

qPCR forward primer

qPCR reverse primer

qPCR forward primer

qPCR reverse primer
