# Supplementary material for: The O-GlcNAc transferase OGT is a conserved and essential regulator of the cellular and organismal response to hypertonic stress
Source: PubMed Central journal article supplement (PMC7556452; doi:10.1371/journal.pgen.1008821), 2020-10-02
Supplement: pgen.1008821.s013.pdf [file pgen.1008821.s013.pdf]

**Table S6 - Bacterial strains used in this study**

| <b>Strain name</b>   | <b>Genotype</b> | <b>Origin</b>                  |
|----------------------|-----------------|--------------------------------|
| <i>E. coli</i> OP50  |                 | Caenorhabditis Genetics Center |
| <i>E. coli</i> HT115 |                 | Caenorhabditis Genetics Center |
