# Supplementary material for: The O-GlcNAc transferase OGT is a conserved and essential regulator of the cellular and organismal response to hypertonic stress
Source: PubMed Central journal article supplement (PMC7556452; doi:10.1371/journal.pgen.1008821), 2020-10-02
Supplement: pgen.1008821.s014.pdf [file pgen.1008821.s014.pdf]

**Table S7 - Chemicals, antibodies, peptides, and recombinant proteins**

| <b>Reagent</b>                                                                   | <b>Source</b>                          | <b>Catalog #</b> |
|----------------------------------------------------------------------------------|----------------------------------------|------------------|
| Anti-GFP primary antibody produced in mouse (clones 7.1 and 13.1)                | Roche                                  | 11814460001      |
| Monoclonal Anti- $\beta$ -Actin primary antibody produced in mouse (clone AC-15) | Sigma Life Sciences                    | A1978            |
| Mouse Anti-O-Linked N-Acetylglucosamine (O-GlcNAc) monoclonal antibody (RL2)     | Thermo Fisher Scientific<br>Invitrogen | MA1-072          |
| Anti-mouse horseradish peroxidase (HRP) – linked secondary antibody              | Cell Signaling Technologies            | 7076S            |
| Goat anti-Mouse IgG (H+L) Cross-Absorbed Secondary Antibody, DyLight 800         | Thermo Fisher Scientific               | SA5-10176        |
| Goat anti-Mouse IgG, IgM (H+L) Secondary Antibody, Alexa Fluor 488               | Thermo Fisher Scientific               | A-10680          |
| <i>Mbo</i> I Restriction Endonuclease                                            | New England BioLabs                    | R0147S           |
| <i>Dde</i> I Restriction Endonuclease                                            | New England BioLabs                    | R0152S           |
| Alt-R S.p. Cas9 Nuclease V3                                                      | Integrated DNA<br>Technologies (IDT)   | 1081058          |
