# Supplementary material for: The O-GlcNAc transferase OGT is a conserved and essential regulator of the cellular and organismal response to hypertonic stress
Source: PubMed Central journal article supplement (PMC7556452; doi:10.1371/journal.pgen.1008821), 2020-10-02
Supplement: pgen.1008821.s015.pdf [file pgen.1008821.s015.pdf]

**Table S8 - Critical commercial assays**

| <b>Assay</b>                                       | <b>Source</b>            | <b>Catalog #</b> |
|----------------------------------------------------|--------------------------|------------------|
| RNeasy Mini Kit                                    | Qiagen                   | 74106            |
| SuperScript VILO Master Mix                        | Thermo Fisher Scientific | 11755050         |
| SYBER Green PCR Master Mix                         | Thermo Fisher Scientific | 4344463          |
| NuPAGE LDS Sample Buffer (4X)                      | Thermo Fisher Scientific | NP0007           |
| NuPAGE Sample Reducing Agent (10X)                 | Thermo Fisher Scientific | NP0009           |
| Blot 8% Bis-Tris Plus                              | Thermo Fisher Scientific | NW00082BOX       |
| Blot 4-12% Bis-Tris Plus                           | Thermo Fisher Scientific | NW04122BOX       |
| iBlot 2 NC Regular Stacks                          | Thermo Fisher Scientific | IB23001          |
| iBind Cards                                        | Thermo Fisher Scientific | SLF1010          |
| iBind Solution Kit                                 | Thermo Fisher Scientific | SLF1020          |
| iBind Flex Fluorescent Detection (FD) Solution Kit | Thermo Fisher Scientific | SLF2019          |
| Genra Puregene Tissue Kit                          | Qiagen                   | 158667           |
