# Supplementary material for: The O-GlcNAc transferase OGT is a conserved and essential regulator of the cellular and organismal response to hypertonic stress
Source: PubMed Central journal article supplement (PMC7556452; doi:10.1371/journal.pgen.1008821), 2020-10-02
Supplement: pgen.1008821.s016.pdf [file pgen.1008821.s016.pdf]

| 50 mM NaCl |     | 250 mM NaCl |     |      |
|------------|-----|-------------|-----|------|
| RFP        | GFP | RFP         | GFP |      |
|            | 390 | 45          | 340 | 542  |
|            | 282 | 43          | 469 | 719  |
|            | 304 | 34          | 334 | 597  |
|            | 453 | 68          | 340 | 745  |
|            | 477 | 63          | 317 | 502  |
|            | 395 | 55          | 334 | 613  |
|            | 372 | 47          | 266 | 514  |
|            | 414 | 47          | 417 | 591  |
|            | 312 | 37          | 317 | 562  |
|            | 422 | 44          | 368 | 517  |
|            | 428 | 58          | 592 | 1009 |
|            | 330 | 41          | 431 | 434  |
|            | 345 | 44          | 313 | 554  |
|            | 436 | 60          | 396 | 657  |
|            | 308 | 46          | 380 | 713  |
|            | 398 | 51          | 304 | 601  |
|            | 275 | 35          | 339 | 603  |
|            | 378 | 59          | 347 | 544  |
|            | 369 | 50          | 333 | 504  |
|            | 321 | 32          | 336 | 578  |
|            | 301 | 46          | 285 | 383  |
|            | 376 | 42          | 346 | 557  |
|            | 391 | 54          | 353 | 726  |
|            | 403 | 45          | 291 | 364  |
|            | 332 | 42          | 316 | 469  |
|            | 385 | 52          | 337 | 606  |
|            | 426 | 62          | 310 | 532  |
|            | 434 | 54          | 289 | 488  |
|            | 323 | 54          | 302 | 543  |
|            | 396 | 57          | 262 | 568  |
|            | 339 | 54          | 259 | 446  |
|            | 307 | 45          | 339 | 493  |
|            | 274 | 32          | 278 | 577  |
|            | 351 | 42          | 345 | 394  |
|            | 466 | 52          | 351 | 593  |
|            | 365 | 57          | 387 | 633  |
|            | 336 | 48          | 405 | 621  |
|            | 355 | 51          | 350 | 535  |
|            | 438 | 60          | 351 | 502  |
|            | 325 | 46          | 317 | 504  |
|            | 370 | 36          | 312 | 533  |

|     |    |     |     |
|-----|----|-----|-----|
| 345 | 44 | 292 | 553 |
| 309 | 45 | 424 | 642 |
| 336 | 45 | 268 | 467 |
| 381 | 48 | 358 | 562 |
| 342 | 44 | 329 | 553 |
| 307 | 38 | 376 | 548 |
| 357 | 42 | 295 | 504 |
| 398 | 49 | 309 | 565 |
| 273 | 38 | 245 | 473 |
| 500 | 47 | 292 | 530 |
| 305 | 41 | 376 | 563 |
| 350 | 41 | 286 | 614 |
| 315 | 45 | 369 | 561 |
| 234 | 35 | 335 | 559 |
| 339 | 39 | 388 | 473 |
| 434 | 60 | 275 | 606 |
| 413 | 47 | 326 | 543 |
| 364 | 45 | 297 | 573 |
| 340 | 39 | 335 | 49  |
| 318 | 52 | 240 | 348 |
| 330 | 47 | 272 | 375 |
| 457 | 48 | 322 | 556 |
| 233 | 24 | 407 | 607 |
| 324 | 38 | 247 | 503 |
| 306 | 33 | 292 | 559 |
| 386 | 36 | 292 | 553 |
| 339 | 42 | 290 | 466 |
| 338 | 51 | 292 | 478 |
| 256 | 43 | 352 | 527 |
| 218 | 38 | 337 | 582 |
| 289 | 34 | 268 | 548 |
| 366 | 45 | 352 | 551 |
| 298 | 50 | 336 | 581 |
| 455 | 58 | 314 | 518 |
| 313 | 54 | 333 | 459 |
| 329 | 49 | 360 | 545 |
| 281 | 37 | 305 | 499 |
| 363 | 49 | 375 | 608 |
| 311 | 45 | 254 | 521 |
| 262 | 42 | 344 | 532 |
| 287 | 39 | 317 | 432 |
| 329 | 42 | 270 | 559 |
| 390 | 44 | 234 | 458 |

|     |    |     |     |
|-----|----|-----|-----|
| 268 | 39 | 337 | 445 |
| 228 | 29 | 275 | 512 |
| 316 | 56 | 215 | 477 |
| 381 | 50 | 276 | 521 |
| 255 | 47 | 236 | 501 |
| 347 | 40 | 296 | 604 |
| 261 | 42 | 350 | 518 |
| 276 | 38 | 350 | 486 |
| 308 | 42 | 286 | 412 |
| 374 | 53 | 189 | 46  |
| 355 | 39 | 257 | 526 |
| 293 | 49 | 301 | 523 |
| 389 | 58 | 334 | 643 |
| 368 | 43 | 260 | 536 |
| 281 | 46 | 343 | 547 |
| 287 | 49 | 257 | 485 |
| 298 | 41 | 289 | 523 |
| 312 | 40 | 358 | 659 |
| 327 | 50 | 311 | 439 |
| 393 | 47 | 299 | 501 |
| 293 | 40 | 276 | 505 |
| 381 | 50 | 265 | 499 |
| 306 | 56 | 290 | 415 |
| 278 | 35 | 309 | 489 |
| 251 | 29 | 336 | 494 |
| 383 | 51 | 317 | 488 |
| 419 | 58 | 245 | 406 |
| 306 | 41 | 233 | 460 |
| 291 | 42 | 331 | 511 |
| 379 | 51 | 278 | 497 |
| 283 | 43 | 329 | 551 |
| 310 | 40 | 269 | 423 |
| 257 | 41 | 306 | 594 |
| 332 | 42 | 262 | 502 |
| 221 | 30 | 385 | 559 |
| 336 | 55 | 313 | 554 |
| 324 | 49 | 288 | 405 |
| 320 | 47 | 263 | 442 |
| 369 | 45 | 259 | 614 |
| 313 | 36 | 239 | 533 |
| 377 | 41 | 279 | 567 |
| 314 | 38 | 264 | 226 |
| 336 | 47 | 217 | 221 |

|     |    |     |     |
|-----|----|-----|-----|
| 376 | 40 | 264 | 497 |
| 350 | 36 | 178 | 49  |
| 310 | 34 | 383 | 532 |
| 312 | 46 | 265 | 479 |
| 292 | 40 | 308 | 485 |
| 343 | 42 | 316 | 499 |
| 245 | 31 | 274 | 440 |
| 280 | 44 | 337 | 478 |
| 329 | 41 | 307 | 514 |
| 241 | 32 | 264 | 477 |
| 282 | 36 | 328 | 577 |
| 295 | 41 | 228 | 453 |
| 377 | 42 | 308 | 544 |
| 274 | 29 | 347 | 487 |
| 298 | 44 | 284 | 491 |
| 168 | 26 | 223 | 449 |
| 258 | 42 | 277 | 435 |
| 285 | 41 | 350 | 487 |
| 280 | 42 | 392 | 563 |
| 376 | 45 | 312 | 461 |
| 280 | 34 | 321 | 478 |
| 357 | 46 | 274 | 502 |
| 228 | 41 | 233 | 483 |
| 357 | 46 | 247 | 488 |
| 310 | 38 | 278 | 498 |
| 372 | 43 | 279 | 536 |
| 305 | 33 | 295 | 477 |
| 324 | 36 | 346 | 474 |
| 266 | 39 | 324 | 564 |
| 359 | 46 | 163 | 22  |
| 426 | 43 | 323 | 422 |
| 326 | 37 | 316 | 544 |
| 336 | 44 | 266 | 491 |
| 281 | 46 | 402 | 617 |
| 392 | 50 | 305 | 484 |
| 276 | 29 | 274 | 432 |
| 297 | 32 | 295 | 495 |
| 441 | 58 | 288 | 484 |
| 251 | 37 | 265 | 353 |
| 372 | 42 | 383 | 38  |
| 240 | 34 | 303 | 516 |
| 268 | 43 | 363 | 544 |
| 328 | 47 | 289 | 519 |

|     |    |     |     |
|-----|----|-----|-----|
| 280 | 45 | 294 | 528 |
| 322 | 44 | 344 | 498 |
| 305 | 38 | 248 | 541 |
| 297 | 45 | 295 | 591 |
| 350 | 45 | 372 | 518 |
| 355 | 40 | 289 | 294 |
| 338 | 39 | 324 | 574 |
| 292 | 53 | 386 | 430 |
| 317 | 35 | 256 | 376 |
| 265 | 37 | 277 | 383 |
| 261 | 41 | 297 | 530 |
| 403 | 54 | 262 | 480 |
| 269 | 31 | 242 | 437 |
| 299 | 43 | 275 | 469 |
| 233 | 38 | 316 | 530 |
| 261 | 34 | 261 | 466 |
| 292 | 40 | 241 | 579 |
| 292 | 35 | 371 | 546 |
| 286 | 37 | 302 | 503 |
| 255 | 38 | 305 | 477 |
| 250 | 37 | 256 | 466 |
| 311 | 49 | 257 | 489 |
| 299 | 38 | 288 | 534 |
| 353 | 44 | 235 | 386 |
| 314 | 31 | 270 | 434 |
| 404 | 45 | 332 | 538 |
| 409 | 45 | 253 | 551 |
| 375 | 37 | 270 | 486 |
| 348 | 42 | 284 | 500 |
| 257 | 23 | 280 | 468 |
| 342 | 51 | 246 | 472 |
| 295 | 31 | 306 | 582 |
| 282 | 39 | 341 | 526 |
| 286 | 36 | 325 | 490 |
| 330 | 38 | 342 | 519 |
| 320 | 39 | 228 | 463 |
| 339 | 40 | 292 | 479 |
| 334 | 40 | 280 | 450 |
| 276 | 39 | 225 | 410 |
| 284 | 33 | 256 | 475 |
| 271 | 40 | 220 | 458 |
| 275 | 27 | 254 | 301 |
| 350 | 46 | 271 | 469 |

|     |    |     |     |
|-----|----|-----|-----|
| 329 | 43 | 357 | 556 |
| 336 | 41 | 276 | 431 |
| 335 | 44 | 261 | 419 |
| 361 | 46 | 273 | 308 |
| 316 | 37 | 219 | 394 |
| 289 | 40 | 203 | 413 |
| 252 | 35 | 248 | 477 |
| 255 | 30 | 369 | 531 |
| 241 | 35 | 315 | 512 |
| 392 | 42 | 268 | 284 |
| 400 | 42 | 207 | 314 |
| 324 | 42 | 323 | 520 |
| 307 | 41 | 268 | 442 |
| 209 | 21 | 204 | 499 |
| 271 | 33 | 233 | 390 |
| 370 | 51 | 283 | 401 |
| 268 | 40 | 241 | 298 |
| 348 | 50 | 286 | 529 |
| 297 | 35 | 214 | 438 |
| 289 | 34 | 287 | 462 |
| 268 | 32 | 250 | 517 |
| 243 | 35 | 309 | 486 |
| 202 | 28 | 290 | 474 |
| 225 | 34 | 318 | 470 |
| 233 | 27 | 311 | 523 |
| 377 | 40 | 326 | 558 |
| 335 | 39 | 216 | 441 |
| 319 | 43 | 291 | 443 |
| 313 | 36 | 291 | 466 |
| 346 | 52 | 225 | 258 |
| 298 | 38 | 244 | 438 |
| 270 | 36 | 269 | 431 |
| 217 | 38 | 255 | 467 |
| 280 | 46 | 307 | 568 |
| 380 | 49 | 287 | 486 |
| 346 | 42 | 261 | 356 |
| 285 | 38 | 283 | 357 |
| 285 | 30 | 303 | 520 |
| 349 | 44 | 311 | 486 |
| 326 | 41 | 416 | 692 |
| 239 | 30 | 289 | 516 |
| 294 | 36 | 290 | 538 |
| 324 | 39 | 247 | 450 |

|     |    |     |     |
|-----|----|-----|-----|
| 343 | 34 | 361 | 618 |
| 242 | 39 | 243 | 454 |
| 292 | 41 | 262 | 517 |
| 261 | 30 | 261 | 474 |
| 304 | 40 | 305 | 492 |
| 331 | 39 | 240 | 253 |
| 337 | 40 | 312 | 476 |
| 244 | 33 | 333 | 517 |
| 231 | 28 | 120 | 269 |
| 261 | 35 | 231 | 470 |
| 331 | 52 | 127 | 388 |
| 416 | 42 | 235 | 419 |
| 262 | 37 | 280 | 452 |
| 285 | 33 | 306 | 482 |
| 420 | 51 | 346 | 431 |
| 262 | 28 | 291 | 532 |
| 220 | 20 | 368 | 663 |
| 200 | 29 | 118 | 161 |
| 266 | 30 | 172 | 42  |
| 280 | 34 | 350 | 503 |
| 236 | 26 |     |     |
| 414 | 64 |     |     |
| 257 | 36 |     |     |
| 325 | 31 |     |     |
| 345 | 35 |     |     |
| 304 | 34 |     |     |
| 377 | 48 |     |     |
| 186 | 23 |     |     |
| 246 | 26 |     |     |
| 375 | 50 |     |     |
| 167 | 22 |     |     |
| 413 | 51 |     |     |
| 376 | 50 |     |     |
| 344 | 35 |     |     |
| 175 | 29 |     |     |
| 327 | 40 |     |     |
| 251 | 32 |     |     |
| 402 | 47 |     |     |
| 309 | 33 |     |     |
| 427 | 57 |     |     |
| 151 | 18 |     |     |
| 267 | 39 |     |     |
| 332 | 47 |     |     |

218

27

259

35
