# Supplementary material for: The O-GlcNAc transferase OGT is a conserved and essential regulator of the cellular and organismal response to hypertonic stress
Source: PubMed Central journal article supplement (PMC7556452; doi:10.1371/journal.pgen.1008821), 2020-10-02
Supplement: pgen.1008821.s017.pdf [file pgen.1008821.s017.pdf]

| 50mM NaCl   | 250mM NaCl  |
|-------------|-------------|
| 0.88117411  | 12.17402506 |
| 1.164483044 | 11.70765374 |
| 0.854120519 | 13.65028397 |
| 1.146369262 | 16.73366913 |
| 1.008639547 | 12.09367454 |
| 1.063357787 | 14.01612072 |
| 0.964869859 | 14.75690577 |
| 0.866984511 | 10.82343835 |
| 0.905651169 | 13.53913364 |
| 0.796258438 | 10.72893332 |
| 1.034899188 | 13.01617207 |
| 0.948819799 | 7.689998962 |
| 0.973974089 | 13.51696686 |
| 1.050941599 | 12.67021561 |
| 1.140567355 | 14.32912776 |
| 0.978590343 | 15.09783623 |
| 0.971961746 | 13.5841177  |
| 1.191993902 | 11.97245592 |
| 1.034802478 | 11.558464   |
| 0.76130515  | 13.13718703 |
| 1.167092177 | 10.2628442  |
| 0.853051532 | 12.29399177 |
| 1.054704561 | 15.70636686 |
| 0.852749139 | 9.55261372  |
| 0.966106554 | 11.33442732 |
| 1.031469608 | 13.73271936 |
| 1.111465309 | 13.10580676 |
| 0.950206183 | 12.89542919 |
| 1.276747627 | 13.73114358 |
| 1.09924245  | 16.55620771 |
| 1.216488152 | 13.15070139 |
| 1.11940685  | 11.10608628 |
| 0.89189399  | 15.85056834 |
| 0.913810188 | 8.72149525  |
| 0.852179826 | 12.90212956 |
| 1.192602768 | 12.49126917 |
| 1.09097747  | 11.70982484 |
| 1.097123822 | 11.67345892 |
| 1.046142779 | 10.92220749 |
| 1.080906908 | 12.14185651 |
| 0.743044114 | 13.04627224 |
| 0.973974089 | 14.46292392 |

|             |             |
|-------------|-------------|
| 1.112161498 | 11.56333195 |
| 1.022791378 | 13.30748264 |
| 0.962121863 | 11.98856247 |
| 0.982517721 | 12.83639448 |
| 0.945276895 | 11.13029142 |
| 0.898452034 | 13.04735089 |
| 0.940214251 | 13.96380548 |
| 1.063003688 | 14.74378123 |
| 0.717863175 | 13.86139182 |
| 1.026591914 | 11.43495268 |
| 0.894601525 | 16.3951789  |
| 1.09097747  | 11.6104838  |
| 1.142262735 | 12.74326817 |
| 0.878574776 | 9.30986186  |
| 1.055784648 | 16.82882337 |
| 0.869083747 | 12.72026185 |
| 0.944115118 | 14.73370583 |
| 0.875990733 | 1.117030663 |
| 1.248791821 | 11.07342132 |
| 1.087671477 | 10.52873477 |
| 0.802119102 | 13.18659724 |
| 0.786627532 | 11.38959034 |
| 0.895679034 | 15.55195008 |
| 0.823581031 | 14.61984534 |
| 0.712244358 | 14.46292392 |
| 0.946157451 | 12.27161554 |
| 1.152304605 | 12.50140621 |
| 1.282750853 | 11.43356786 |
| 1.331192692 | 13.18884929 |
| 0.898452034 | 15.61563274 |
| 0.938956019 | 11.95426165 |
| 1.281349377 | 13.20537312 |
| 0.973487588 | 12.59835766 |
| 1.317538286 | 10.52645829 |
| 1.137402043 | 11.56133068 |
| 1.005562863 | 12.49437476 |
| 1.030868518 | 12.38186696 |
| 1.105009334 | 15.66454658 |
| 1.224226626 | 11.8104654  |
| 1.037759056 | 10.40730558 |
| 0.974916037 | 15.81109199 |
| 0.861592463 | 14.94732379 |
| 1.111331527 | 10.08425762 |

|             |             |
|-------------|-------------|
| 0.971352747 | 14.21841182 |
| 1.353364456 | 16.94313382 |
| 1.002210274 | 14.4159233  |
| 1.407574853 | 16.21211011 |
| 0.880327641 | 15.58328629 |
| 1.22891715  | 11.30252658 |
| 1.0514493   | 10.604301   |
| 1.041387585 | 11.00132525 |
| 1.082226313 | 1.858702356 |
| 0.83897704  | 15.63026865 |
| 1.277151099 | 13.26933062 |
| 1.138655148 | 14.70206464 |
| 0.892348419 | 15.7436441  |
| 1.250159236 | 12.17887094 |
| 1.303851122 | 14.41193972 |
| 1.050706489 | 13.82030628 |
| 0.979082344 | 14.05776276 |
| 1.167712888 | 10.77997995 |
| 0.913311927 | 12.79618055 |
| 1.042572326 | 13.97320781 |
| 1.002210274 | 14.38031812 |
| 1.397592053 | 10.92858465 |
| 0.96147295  | 12.08548828 |
| 0.882344328 | 11.22797646 |
| 1.016916336 | 11.75640074 |
| 1.057128527 | 12.65533865 |
| 1.023237038 | 15.07702769 |
| 1.10222466  | 11.78980788 |
| 1.027648962 | 13.65291589 |
| 1.160368263 | 12.78996991 |
| 0.985399005 | 12.00886352 |
| 1.218328925 | 14.82445856 |
| 0.966106554 | 14.63242301 |
| 1.036675424 | 11.08829828 |
| 1.250078351 | 13.51696686 |
| 1.154954543 | 10.73930947 |
| 1.121661211 | 12.83454103 |
| 0.93132223  | 18.10432882 |
| 0.878358857 | 17.0311169  |
| 0.83053192  | 15.52003433 |
| 0.924203844 | 6.537599837 |
| 1.068248772 | 7.777613573 |
| 0.812430031 | 14.37693415 |

|             |             |
|-------------|-------------|
| 0.785503778 | 2.102276809 |
| 0.837589154 | 10.60783315 |
| 1.125944696 | 13.80395266 |
| 1.046142779 | 12.02554711 |
| 0.935123545 | 12.05944399 |
| 0.96629433  | 12.26354236 |
| 1.200075217 | 10.83207897 |
| 0.95170375  | 12.7861138  |
| 1.014020553 | 13.7983855  |
| 0.974916037 | 13.43432317 |
| 1.06139164  | 15.17319981 |
| 0.850788796 | 13.48844871 |
| 0.808278928 | 10.71798903 |
| 1.127587452 | 13.20313226 |
| 1.181892259 | 15.37642236 |
| 1.243206884 | 11.99287507 |
| 1.098633452 | 10.62612055 |
| 1.145526343 | 10.96821992 |
| 0.913983784 | 11.28392402 |
| 0.927330849 | 11.37199568 |
| 0.984018894 | 13.99158696 |
| 1.373291815 | 15.83087908 |
| 0.984018894 | 15.08817424 |
| 0.936129055 | 13.68038654 |
| 0.882753275 | 14.67149629 |
| 0.826281297 | 12.34838566 |
| 0.848538032 | 10.4620325  |
| 1.119687403 | 13.2937625  |
| 0.978536895 | 1.03073945  |
| 0.770854973 | 9.97754627  |
| 0.866758174 | 13.146969   |
| 1.00006268  | 14.0965773  |
| 1.250159236 | 11.72122311 |
| 0.974087026 | 12.11879235 |
| 0.802421835 | 12.04056886 |
| 0.822824758 | 12.81436248 |
| 1.004391956 | 12.83413773 |
| 1.12574966  | 10.17285029 |
| 0.862224129 | 0.757702368 |
| 1.081885991 | 13.00531558 |
| 1.225314248 | 11.44474436 |
| 1.09430362  | 13.71460604 |
| 1.227349653 | 13.71514533 |

|             |             |
|-------------|-------------|
| 1.043543667 | 11.05566122 |
| 0.951475432 | 16.65940192 |
| 1.157097316 | 15.29957218 |
| 0.981879723 | 10.63409759 |
| 0.860489272 | 7.768967586 |
| 0.88117411  | 13.52946751 |
| 1.386139182 | 8.50736317  |
| 0.84318448  | 11.21661211 |
| 1.066276093 | 10.55924403 |
| 1.199657218 | 13.62803506 |
| 1.023298967 | 13.99116144 |
| 0.880082197 | 13.7904962  |
| 1.098274978 | 13.02428739 |
| 1.245493592 | 12.80862789 |
| 0.994837693 | 13.63512837 |
| 1.046142779 | 18.34743437 |
| 0.915374932 | 11.23912638 |
| 0.987983093 | 12.71964129 |
| 1.138039243 | 11.94352056 |
| 1.130252658 | 13.90143948 |
| 1.203232386 | 14.53080108 |
| 0.970568585 | 14.15997841 |
| 0.951901022 | 12.54391967 |
| 0.753955767 | 12.27551686 |
| 0.850638374 | 12.37536491 |
| 0.840239371 | 16.63201621 |
| 0.753501772 | 13.74631612 |
| 0.921687862 | 13.44514487 |
| 0.683452812 | 12.76443639 |
| 1.138827359 | 14.65280309 |
| 0.80251563  | 14.52497455 |
| 1.05615904  | 11.77999719 |
| 0.961280847 | 11.51400837 |
| 0.87939396  | 11.58924312 |
| 0.930740154 | 15.50814903 |
| 0.901102335 | 12.52755978 |
| 0.914591891 | 12.27349653 |
| 1.079119019 | 13.91602372 |
| 0.887379562 | 14.16992221 |
| 1.127209194 | 15.89851712 |
| 0.749799061 | 9.049958773 |
| 1.003699272 | 13.2165278  |
| 0.998128323 | 11.89379359 |

|             |             |
|-------------|-------------|
| 0.931876589 | 11.92564864 |
| 1.003047942 | 12.25991156 |
| 0.973115638 | 8.615924632 |
| 0.89418723  | 13.73934183 |
| 1.057002393 | 15.53702396 |
| 1.06067254  | 14.68860392 |
| 0.898452034 | 10.98960232 |
| 1.109084979 | 12.41289921 |
| 0.818233102 | 8.09277317  |
| 0.80186844  | 11.58438878 |
| 0.989961037 | 12.29460678 |
| 1.019904019 | 12.59509064 |
| 0.76733822  | 18.6803152  |
| 0.929947585 | 12.78269739 |
| 1.052645829 | 10.82110868 |
| 1.139827207 | 9.443066396 |
| 1.097247455 | 14.12548801 |
| 0.899964579 | 15.63054636 |
| 0.898452034 | 12.29345344 |
| 0.911861766 | 15.79298985 |
| 1.099956708 | 12.01134418 |
| 1.058572198 | 12.48228705 |
| 1.154011723 | 11.28715684 |
| 0.884955973 | 12.84266404 |
| 0.810275044 | 13.0716503  |
| 0.889065221 | 15.59188634 |
| 1.029417612 | 11.62584582 |
| 0.878358857 | 12.22944504 |
| 1.147733523 | 8.756912489 |
| 0.973825527 | 13.70875788 |
| 1.018245638 | 12.23598151 |
| 1.337327221 | 13.98590333 |
| 1.25462409  | 14.12940202 |
| 0.984750716 | 12.9320744  |
| 0.927015538 | 10.41653584 |
| 1.018245638 | 9.633755111 |
| 0.803878135 | 13.10613198 |
| 0.962811062 | 11.93410081 |
| 0.96046176  | 12.70359342 |
| 0.95859945  | 13.63533087 |
| 0.935123545 | 14.16765914 |
| 0.919249535 | 13.91327542 |
| 0.757004775 | 13.07359705 |

1.230730782 14.26800987  
1.072296349 15.0696468  
0.877797964 13.86920783  
1.004847669 12.31910297  
0.899809212 8.050504578  
0.906450123 11.6510799  
1.032851621 11.85659899  
0.925677853 17.11925479  
1.024097625 15.53816396  
1.199745616 23.33145518  
0.771027346 13.61632731  
1.078485361 12.32804541  
0.884265949 12.02927445  
0.927330849 9.512945161  
0.816151084 13.96151236  
0.69425839 13.75876749  
1.107342132 10.41975939  
0.861298002 1.864810326  
0.927330849 10.97523334  
0.841347032  
1.180574653  
1.069752227  
0.728437264  
0.774752116  
0.854120519  
0.972330052  
0.944340713  
0.807145933  
1.018245638  
1.00605108  
0.943048321  
1.015537538  
0.777004302  
1.265533865  
0.93417031  
0.973621327  
0.892864646  
0.815585099  
1.019437963  
0.910352061  
1.115493817  
1.081119239  
0.945847439

1.032005714
