# Supplementary material for: The O-GlcNAc transferase OGT is a conserved and essential regulator of the cellular and organismal response to hypertonic stress
Source: PubMed Central journal article supplement (PMC7556452; doi:10.1371/journal.pgen.1008821), 2020-10-02
Supplement: pgen.1008821.s018.pdf [file pgen.1008821.s018.pdf]

| 50 mM NaCl |     | 250 mM NaCl |     |     |
|------------|-----|-------------|-----|-----|
| TOF        | GFP | TOF         | GFP |     |
|            | 983 | 152         | 995 | 230 |
|            | 952 | 102         | 971 | 368 |
|            | 927 | 80          | 967 | 199 |
|            | 923 | 159         | 961 | 550 |
|            | 902 | 69          | 958 | 168 |
|            | 900 | 92          | 942 | 427 |
|            | 874 | 62          | 941 | 254 |
|            | 859 | 89          | 920 | 130 |
|            | 856 | 68          | 909 | 110 |
|            | 855 | 65          | 907 | 504 |
|            | 853 | 62          | 904 | 277 |
|            | 844 | 87          | 903 | 149 |
|            | 839 | 96          | 902 | 294 |
|            | 834 | 72          | 895 | 173 |
|            | 833 | 64          | 889 | 218 |
|            | 832 | 78          | 883 | 168 |
|            | 831 | 73          | 881 | 215 |
|            | 831 | 120         | 880 | 140 |
|            | 830 | 84          | 874 | 207 |
|            | 830 | 144         | 873 | 162 |
|            | 829 | 69          | 871 | 188 |
|            | 828 | 115         | 867 | 316 |
|            | 824 | 54          | 867 | 261 |
|            | 821 | 55          | 867 | 255 |
|            | 821 | 93          | 857 | 109 |
|            | 820 | 88          | 851 | 180 |
|            | 816 | 87          | 847 | 186 |
|            | 816 | 75          | 844 | 120 |
|            | 812 | 77          | 842 | 151 |
|            | 809 | 72          | 841 | 220 |
|            | 808 | 88          | 839 | 253 |
|            | 804 | 106         | 837 | 172 |
|            | 797 | 54          | 832 | 167 |
|            | 797 | 60          | 831 | 100 |
|            | 795 | 47          | 829 | 185 |
|            | 795 | 71          | 827 | 151 |
|            | 794 | 69          | 827 | 429 |
|            | 791 | 73          | 827 | 820 |
|            | 791 | 82          | 823 | 596 |
|            | 791 | 141         | 823 | 128 |
|            | 789 | 72          | 823 | 125 |

|     |     |     |     |
|-----|-----|-----|-----|
| 786 | 61  | 822 | 771 |
| 786 | 86  | 821 | 378 |
| 784 | 78  | 820 | 142 |
| 783 | 75  | 820 | 157 |
| 782 | 76  | 818 | 113 |
| 781 | 69  | 815 | 165 |
| 781 | 57  | 814 | 132 |
| 779 | 55  | 813 | 146 |
| 778 | 82  | 813 | 114 |
| 778 | 55  | 813 | 302 |
| 778 | 82  | 813 | 108 |
| 777 | 57  | 813 | 651 |
| 775 | 77  | 812 | 372 |
| 775 | 81  | 810 | 283 |
| 774 | 67  | 810 | 292 |
| 773 | 81  | 809 | 99  |
| 773 | 73  | 808 | 139 |
| 772 | 68  | 807 | 305 |
| 772 | 64  | 807 | 125 |
| 772 | 77  | 806 | 360 |
| 769 | 84  | 806 | 167 |
| 769 | 103 | 805 | 125 |
| 768 | 104 | 803 | 247 |
| 766 | 81  | 803 | 118 |
| 766 | 67  | 803 | 126 |
| 765 | 77  | 802 | 106 |
| 764 | 81  | 802 | 559 |
| 764 | 72  | 802 | 132 |
| 764 | 66  | 801 | 123 |
| 763 | 50  | 800 | 203 |
| 762 | 82  | 798 | 107 |
| 762 | 72  | 798 | 207 |
| 760 | 67  | 797 | 392 |
| 760 | 110 | 797 | 146 |
| 760 | 79  | 795 | 89  |
| 760 | 82  | 795 | 298 |
| 758 | 111 | 794 | 110 |
| 758 | 70  | 789 | 128 |
| 758 | 74  | 787 | 123 |
| 756 | 89  | 787 | 89  |
| 756 | 60  | 786 | 350 |
| 755 | 70  | 786 | 160 |
| 754 | 87  | 786 | 215 |

|     |     |     |     |
|-----|-----|-----|-----|
| 753 | 50  | 786 | 121 |
| 753 | 89  | 785 | 156 |
| 752 | 83  | 785 | 121 |
| 752 | 78  | 785 | 444 |
| 752 | 71  | 784 | 153 |
| 750 | 68  | 783 | 336 |
| 750 | 62  | 783 | 237 |
| 750 | 74  | 783 | 275 |
| 750 | 78  | 783 | 103 |
| 748 | 61  | 783 | 175 |
| 748 | 83  | 783 | 615 |
| 746 | 69  | 783 | 683 |
| 746 | 76  | 781 | 224 |
| 746 | 66  | 781 | 130 |
| 745 | 60  | 781 | 134 |
| 745 | 116 | 780 | 104 |
| 745 | 84  | 779 | 129 |
| 744 | 78  | 778 | 174 |
| 744 | 83  | 778 | 730 |
| 743 | 73  | 777 | 92  |
| 743 | 66  | 777 | 128 |
| 743 | 51  | 776 | 126 |
| 742 | 58  | 775 | 148 |
| 741 | 55  | 774 | 104 |
| 741 | 58  | 774 | 210 |
| 740 | 52  | 773 | 187 |
| 740 | 81  | 773 | 406 |
| 740 | 86  | 773 | 437 |
| 739 | 70  | 772 | 199 |
| 737 | 86  | 772 | 222 |
| 737 | 89  | 772 | 129 |
| 737 | 65  | 772 | 302 |
| 736 | 57  | 772 | 132 |
| 735 | 70  | 771 | 461 |
| 735 | 75  | 769 | 400 |
| 735 | 59  | 769 | 309 |
| 735 | 72  | 768 | 792 |
| 735 | 67  | 768 | 129 |
| 735 | 71  | 767 | 121 |
| 734 | 148 | 767 | 263 |
| 734 | 69  | 767 | 116 |
| 733 | 58  | 765 | 162 |
| 733 | 66  | 765 | 155 |

|     |     |     |     |
|-----|-----|-----|-----|
| 733 | 60  | 765 | 173 |
| 732 | 57  | 765 | 161 |
| 731 | 58  | 763 | 215 |
| 730 | 82  | 763 | 116 |
| 730 | 62  | 763 | 237 |
| 730 | 73  | 762 | 428 |
| 730 | 58  | 762 | 103 |
| 730 | 73  | 762 | 138 |
| 729 | 63  | 761 | 504 |
| 729 | 63  | 761 | 113 |
| 729 | 50  | 761 | 175 |
| 729 | 113 | 761 | 467 |
| 728 | 47  | 761 | 316 |
| 726 | 58  | 761 | 240 |
| 726 | 63  | 761 | 156 |
| 726 | 71  | 761 | 284 |
| 726 | 79  | 760 | 143 |
| 725 | 72  | 760 | 173 |
| 724 | 62  | 759 | 103 |
| 724 | 122 | 758 | 119 |
| 724 | 60  | 758 | 205 |
| 724 | 51  | 758 | 152 |
| 723 | 72  | 758 | 298 |
| 723 | 71  | 757 | 192 |
| 723 | 81  | 756 | 296 |
| 721 | 58  | 756 | 119 |
| 720 | 74  | 755 | 583 |
| 719 | 61  | 754 | 318 |
| 719 | 92  | 754 | 120 |
| 717 | 87  | 754 | 240 |
| 717 | 63  | 754 | 147 |
| 716 | 47  | 753 | 111 |
| 716 | 73  | 753 | 218 |
| 716 | 59  | 752 | 116 |
| 715 | 73  | 751 | 161 |
| 715 | 74  | 751 | 248 |
| 715 | 47  | 751 | 260 |
| 712 | 49  | 751 | 146 |
| 711 | 60  | 751 | 218 |
| 711 | 61  | 750 | 143 |
| 710 | 78  | 750 | 213 |
| 710 | 60  | 749 | 458 |
| 710 | 75  | 749 | 90  |

|     |     |     |      |
|-----|-----|-----|------|
| 709 | 55  | 749 | 113  |
| 709 | 59  | 748 | 126  |
| 708 | 58  | 748 | 187  |
| 707 | 68  | 748 | 362  |
| 706 | 47  | 747 | 494  |
| 706 | 120 | 747 | 120  |
| 706 | 57  | 747 | 122  |
| 705 | 72  | 747 | 128  |
| 705 | 72  | 747 | 199  |
| 704 | 89  | 746 | 106  |
| 704 | 67  | 746 | 56   |
| 704 | 74  | 746 | 115  |
| 702 | 74  | 746 | 73   |
| 702 | 51  | 745 | 104  |
| 701 | 50  | 745 | 166  |
| 701 | 53  | 744 | 131  |
| 701 | 48  | 744 | 504  |
| 701 | 78  | 744 | 123  |
| 700 | 69  | 742 | 119  |
| 700 | 64  | 742 | 227  |
| 700 | 73  | 741 | 234  |
| 700 | 52  | 740 | 205  |
| 699 | 57  | 740 | 118  |
| 699 | 64  | 740 | 67   |
| 698 | 60  | 739 | 166  |
| 698 | 74  | 739 | 132  |
| 698 | 77  | 738 | 270  |
| 698 | 68  | 738 | 227  |
| 697 | 61  | 738 | 162  |
| 696 | 96  | 738 | 146  |
| 696 | 70  | 738 | 185  |
| 696 | 59  | 737 | 312  |
| 696 | 60  | 737 | 143  |
| 696 | 57  | 736 | 130  |
| 696 | 75  | 736 | 530  |
| 695 | 68  | 735 | 282  |
| 694 | 73  | 735 | 114  |
| 694 | 60  | 735 | 1025 |
| 694 | 71  | 733 | 567  |
| 691 | 72  | 733 | 614  |
| 689 | 55  | 733 | 314  |
| 687 | 66  | 733 | 298  |
| 687 | 68  | 733 | 343  |

|     |    |     |     |
|-----|----|-----|-----|
| 687 | 68 | 733 | 355 |
| 686 | 77 | 732 | 351 |
| 686 | 53 | 732 | 117 |
| 685 | 68 | 731 | 117 |
| 684 | 56 | 731 | 97  |
| 684 | 52 | 731 | 395 |
| 683 | 70 | 728 | 806 |
| 682 | 49 | 728 | 630 |
| 681 | 66 | 728 | 93  |
| 680 | 72 | 728 | 250 |
| 679 | 59 | 727 | 249 |
| 679 | 40 | 726 | 604 |
| 679 | 72 | 726 | 150 |
| 677 | 63 | 724 | 173 |
| 677 | 57 | 724 | 218 |
| 676 | 55 | 724 | 200 |
| 675 | 70 | 724 | 82  |
| 675 | 69 | 723 | 111 |
| 674 | 85 | 723 | 124 |
| 674 | 72 | 720 | 137 |
| 673 | 68 | 720 | 119 |
| 673 | 65 | 720 | 82  |
| 672 | 57 | 720 | 95  |
| 672 | 58 | 719 | 444 |
| 671 | 72 | 718 | 178 |
| 671 | 69 | 718 | 233 |
| 670 | 58 | 718 | 154 |
| 669 | 74 | 718 | 132 |
| 667 | 85 | 718 | 216 |
| 667 | 74 | 717 | 143 |
| 665 | 58 | 717 | 112 |
| 664 | 87 | 717 | 94  |
| 664 | 71 | 717 | 134 |
| 663 | 64 | 717 | 94  |
| 657 | 71 | 716 | 180 |
| 657 | 57 | 716 | 226 |
| 656 | 44 | 715 | 412 |
| 655 | 96 | 715 | 109 |
| 655 | 50 | 715 | 280 |
| 653 | 48 | 714 | 155 |
| 651 | 81 | 714 | 194 |
| 648 | 59 | 713 | 251 |
| 648 | 47 | 713 | 120 |

|     |     |     |     |
|-----|-----|-----|-----|
| 647 | 238 | 713 | 310 |
| 647 | 57  | 713 | 156 |
| 643 | 60  | 713 | 165 |
| 640 | 59  | 713 | 129 |
| 626 | 56  | 712 | 137 |
| 623 | 4   | 712 | 418 |
| 622 | 47  | 712 | 97  |
| 611 | 49  | 712 | 298 |
| 599 | 96  | 712 | 582 |
| 598 | 56  | 712 | 142 |
| 597 | 108 | 711 | 124 |
| 594 | 37  | 711 | 115 |
| 583 | 44  | 711 | 132 |
| 582 | 99  | 711 | 155 |
| 570 | 62  | 710 | 62  |
| 566 | 91  | 710 | 118 |
| 539 | 73  | 710 | 114 |
| 524 | 94  | 710 | 133 |
| 520 | 90  | 710 | 347 |
| 515 | 97  | 710 | 260 |
|     |     | 710 | 168 |
|     |     | 709 | 287 |
|     |     | 709 | 98  |
|     |     | 707 | 178 |
|     |     | 707 | 427 |
|     |     | 707 | 138 |
|     |     | 706 | 102 |
|     |     | 706 | 151 |
|     |     | 706 | 333 |
|     |     | 705 | 124 |
|     |     | 705 | 529 |
|     |     | 705 | 130 |
|     |     | 705 | 220 |
|     |     | 704 | 111 |
|     |     | 704 | 254 |
|     |     | 704 | 349 |
|     |     | 704 | 162 |
|     |     | 703 | 100 |
|     |     | 703 | 134 |
|     |     | 702 | 267 |
|     |     | 701 | 118 |
|     |     | 701 | 115 |
|     |     | 701 | 454 |

|     |     |
|-----|-----|
| 700 | 288 |
| 700 | 105 |
| 700 | 116 |
| 700 | 481 |
| 700 | 195 |
| 699 | 158 |
| 699 | 204 |
| 699 | 232 |
| 699 | 124 |
| 699 | 182 |
| 698 | 225 |
| 698 | 114 |
| 698 | 107 |
| 697 | 94  |
| 697 | 544 |
| 697 | 86  |
| 697 | 105 |
| 697 | 110 |
| 696 | 91  |
| 696 | 182 |
| 696 | 92  |
| 696 | 195 |
| 696 | 166 |
| 696 | 141 |
| 695 | 122 |
| 695 | 90  |
| 695 | 484 |
| 695 | 848 |
| 695 | 108 |
| 694 | 114 |
| 694 | 275 |
| 693 | 113 |
| 693 | 171 |
| 693 | 143 |
| 693 | 123 |
| 693 | 115 |
| 692 | 130 |
| 692 | 126 |
| 692 | 219 |
| 692 | 90  |
| 692 | 210 |
| 691 | 121 |
| 691 | 458 |



|     |     |
|-----|-----|
| 690 | 131 |
| 690 | 325 |
| 690 | 111 |
| 690 | 360 |
| 690 | 233 |
| 690 | 126 |
| 690 | 98  |
| 690 | 116 |
| 689 | 237 |
| 689 | 112 |
| 688 | 109 |
| 688 | 412 |
| 688 | 354 |
| 688 | 313 |
| 688 | 143 |
| 687 | 109 |
| 686 | 300 |
| 686 | 307 |
| 684 | 118 |
| 684 | 115 |
| 684 | 251 |
| 682 | 123 |
| 682 | 424 |
| 680 | 147 |
| 680 | 111 |
| 680 | 298 |
| 679 | 149 |
| 679 | 139 |
| 679 | 437 |
| 678 | 338 |
| 678 | 109 |
| 677 | 191 |
| 677 | 116 |
| 675 | 327 |
| 675 | 118 |
| 675 | 202 |
| 674 | 137 |
| 673 | 90  |
| 673 | 193 |
| 673 | 121 |
| 672 | 251 |
| 672 | 103 |
| 671 | 78  |

|     |     |
|-----|-----|
| 671 | 184 |
| 670 | 108 |
| 670 | 120 |
| 670 | 132 |
| 670 | 393 |
| 669 | 308 |
| 669 | 139 |
| 668 | 114 |
| 668 | 174 |
| 668 | 106 |
| 667 | 88  |
| 667 | 239 |
| 666 | 74  |
| 666 | 136 |
| 666 | 194 |
| 665 | 332 |
| 665 | 105 |
| 665 | 86  |
| 665 | 281 |
| 665 | 102 |
| 664 | 82  |
| 663 | 114 |
| 661 | 216 |
| 661 | 109 |
| 661 | 102 |
| 660 | 232 |
| 659 | 193 |
| 659 | 129 |
| 658 | 191 |
| 658 | 93  |
| 658 | 115 |
| 657 | 113 |
| 657 | 107 |
| 657 | 130 |
| 656 | 185 |
| 656 | 96  |
| 655 | 170 |
| 655 | 396 |
| 655 | 390 |
| 653 | 202 |
| 653 | 93  |
| 653 | 108 |
| 653 | 244 |

|     |     |
|-----|-----|
| 652 | 287 |
| 652 | 72  |
| 652 | 147 |
| 650 | 184 |
| 650 | 369 |
| 648 | 106 |
| 647 | 49  |
| 645 | 135 |
| 645 | 85  |
| 644 | 113 |
| 643 | 220 |
| 639 | 143 |
| 638 | 104 |
| 638 | 59  |
| 635 | 80  |
| 635 | 106 |
| 634 | 439 |
| 634 | 219 |
| 630 | 736 |
| 625 | 189 |
| 622 | 657 |
| 621 | 91  |
| 619 | 59  |
| 619 | 122 |
| 618 | 60  |
| 617 | 308 |
| 613 | 594 |
| 613 | 340 |
| 604 | 271 |
| 601 | 116 |
| 597 | 157 |
| 593 | 99  |
| 592 | 129 |
| 590 | 548 |
| 590 | 34  |
| 580 | 54  |
| 575 | 88  |
| 571 | 182 |
| 540 | 364 |
| 538 | 389 |
| 533 | 497 |
| 532 | 48  |
| 530 | 110 |

507  
500

247  
68
