# Supplementary material for: The O-GlcNAc transferase OGT is a conserved and essential regulator of the cellular and organismal response to hypertonic stress
Source: PubMed Central journal article supplement (PMC7556452; doi:10.1371/journal.pgen.1008821), 2020-10-02
Supplement: pgen.1008821.s019.pdf [file pgen.1008821.s019.pdf]

| 50mM NaCl   | 250mMNaCl   |
|-------------|-------------|
| 1.555178895 | 2.324850544 |
| 1.077589887 | 3.811701407 |
| 0.86796165  | 2.069745209 |
| 1.732549721 | 5.756116637 |
| 0.769365729 | 1.763737936 |
| 1.028100574 | 4.558975475 |
| 0.713461497 | 2.714778349 |
| 1.042046565 | 1.421169272 |
| 0.798960726 | 1.217079887 |
| 0.76460569  | 5.588735203 |
| 0.731026199 | 3.081779928 |
| 1.036733399 | 1.659544116 |
| 1.150799212 | 3.278167018 |
| 0.868273866 | 1.944076504 |
| 0.772725521 | 2.466294965 |
| 0.942891151 | 1.913545802 |
| 0.883511323 | 2.454442346 |
| 1.452347381 | 1.600057711 |
| 1.017868038 | 2.382040803 |
| 1.744916637 | 1.866341248 |
| 0.83711446  | 2.17085081  |
| 1.39687578  | 3.665711389 |
| 0.659108378 | 3.027692001 |
| 0.673767124 | 2.958089886 |
| 1.139278955 | 1.279192663 |
| 1.079342066 | 2.127321987 |
| 1.072307584 | 2.208613984 |
| 0.92440309  | 1.429977102 |
| 0.953728981 | 1.803661933 |
| 0.895105568 | 2.630976498 |
| 1.095371899 | 3.032835424 |
| 1.325989546 | 2.066775347 |
| 0.681437018 | 2.018754132 |
| 0.757152242 | 1.210289484 |
| 0.594594672 | 2.24443732  |
| 0.898217483 | 1.836376479 |
| 0.874014971 | 5.217255028 |
| 0.928189519 | 9.972375579 |
| 1.042623844 | 7.283442705 |
| 1.792804414 | 1.564229306 |
| 0.917795189 | 1.527567681 |
| 0.780544329 | 9.433499791 |

|             |             |
|-------------|-------------|
| 1.100439546 | 4.630617688 |
| 1.000619181 | 1.741665606 |
| 0.963362607 | 1.925644368 |
| 0.977455789 | 1.389362022 |
| 0.888563236 | 2.036182118 |
| 0.734030499 | 1.630946856 |
| 0.710093464 | 1.80614492  |
| 1.060045579 | 1.41027754  |
| 0.711006181 | 3.735998395 |
| 1.060045579 | 1.336052406 |
| 0.737809292 | 8.053427005 |
| 0.999261848 | 4.607625725 |
| 1.051171555 | 3.513918628 |
| 0.870610951 | 3.625668691 |
| 1.053891274 | 1.230770155 |
| 0.949803247 | 1.730189703 |
| 0.885894277 | 3.801163832 |
| 0.833782849 | 1.557854029 |
| 1.00314499  | 4.49218613  |
| 1.098609196 | 2.083875233 |
| 1.347104133 | 1.561724474 |
| 1.361953885 | 3.093653657 |
| 1.063522134 | 1.477939804 |
| 0.879703494 | 1.578139113 |
| 1.012324094 | 1.329296253 |
| 1.066306223 | 7.010156656 |
| 0.947827754 | 1.655350051 |
| 0.868842108 | 1.544410974 |
| 0.659076384 | 2.55209205  |
| 1.082303754 | 1.348562783 |
| 0.950315491 | 2.608901832 |
| 0.886648521 | 4.946727981 |
| 1.455691602 | 1.842403789 |
| 1.045451241 | 1.125934591 |
| 1.085151922 | 3.769983236 |
| 1.472800954 | 1.393357201 |
| 0.928793394 | 1.631635892 |
| 0.981867303 | 1.571884613 |
| 1.184018518 | 1.137379923 |
| 0.798214731 | 4.478533034 |
| 0.932483964 | 2.047329387 |
| 1.160481417 | 2.751098864 |
| 0.667829058 | 1.548292849 |

1.188735723 1.998689014  
1.110070433 1.550265197  
1.043198721 5.688576424  
0.949578323 1.962753009  
0.911880509 4.315864478  
0.831420464 3.044225837  
0.992340554 3.532329558  
1.045980584 1.32301798  
0.82019765 2.247846082  
1.116006639 7.899573375  
0.93025186 8.773022138  
1.024625237 2.884611085  
0.889806127 1.674104648  
0.810000452 1.72561556  
1.566000874 1.341000749  
1.134000633 1.665491944  
1.054415911 2.249365009  
1.122006675 9.436991129  
0.988153311 1.190850086  
0.893398884 1.656834902  
0.690353683 1.633048592  
0.786166207 1.920659137  
0.746508514 1.351396103  
0.78722716 2.728780593  
0.706743638 2.433057632  
1.100889128 5.282467373  
1.168845247 5.685808478  
0.952673062 2.592543546  
1.173603097 2.892184257  
1.21454274 1.680593555  
0.887025597 3.934412818  
0.778910082 1.719677126  
0.957857678 6.013631761  
1.026276083 5.231472361  
0.807337185 4.041312399  
0.98522504 10.37180266  
0.916806634 1.689346646  
0.971541359 1.586646909  
2.027943911 3.44866229  
0.945460337 1.521082987  
0.795818998 2.129824718  
0.905587136 2.037795255  
0.823261033 2.274442446

|             |             |
|-------------|-------------|
| 0.783166421 | 2.116677652 |
| 0.797996341 | 2.83402845  |
| 1.129747206 | 1.52905721  |
| 0.854199107 | 3.124022058 |
| 1.005750561 | 5.649097641 |
| 0.799089487 | 1.359479105 |
| 1.005750561 | 1.821438025 |
| 0.869167152 | 6.660949842 |
| 0.869167152 | 1.493427246 |
| 0.6898152   | 2.312829806 |
| 1.558982352 | 6.17195154  |
| 0.649316983 | 4.176309821 |
| 0.803492184 | 3.171880877 |
| 0.872758752 | 2.06172257  |
| 0.98358526  | 3.753392371 |
| 1.094411768 | 1.892399083 |
| 0.998814351 | 2.289405883 |
| 0.861278105 | 1.364852541 |
| 1.694773045 | 1.578948771 |
| 0.83349494  | 2.720037798 |
| 0.708470699 | 2.016808514 |
| 1.001577323 | 3.954006165 |
| 0.987666526 | 2.550912917 |
| 1.126774488 | 3.937859341 |
| 0.809064252 | 1.583125884 |
| 1.033688077 | 7.766259302 |
| 0.853279336 | 4.241759662 |
| 1.286913097 | 1.600664023 |
| 1.22036679  | 3.201328047 |
| 0.883713882 | 1.960813429 |
| 0.660199391 | 1.482580509 |
| 1.025416075 | 2.911734693 |
| 0.828760937 | 1.551423738 |
| 1.026850224 | 2.156136357 |
| 1.040916665 | 3.321253518 |
| 0.661122747 | 3.481959334 |
| 0.692159796 | 1.955254087 |
| 0.848734651 | 2.91948898  |
| 0.862880228 | 1.91763107  |
| 1.104909067 | 2.856331594 |
| 0.849930052 | 6.149983406 |
| 1.062412565 | 1.208512023 |
| 0.780201423 | 1.517353984 |

|             |             |
|-------------|-------------|
| 0.836943344 | 1.694178753 |
| 0.823919951 | 2.514376404 |
| 0.967341417 | 4.86740245  |
| 0.669550657 | 6.651148291 |
| 1.709491039 | 1.615663552 |
| 0.812008244 | 1.642591278 |
| 1.02714951  | 1.723374456 |
| 1.02714951  | 2.679308724 |
| 1.271474431 | 1.429082567 |
| 0.957177381 | 0.754987017 |
| 1.057180988 | 1.550419766 |
| 1.060192899 | 0.984179504 |
| 0.730673485 | 1.404000784 |
| 0.717368446 | 2.241001251 |
| 0.760410553 | 1.770878005 |
| 0.688673708 | 6.813148964 |
| 1.119094776 | 1.662732783 |
| 0.991382696 | 1.612996183 |
| 0.91954337  | 3.076891879 |
| 1.048854157 | 3.176054404 |
| 0.747128988 | 2.78620088  |
| 0.820139943 | 1.603764409 |
| 0.920858883 | 0.910611995 |
| 0.86454203  | 2.259196119 |
| 1.066268503 | 1.796469203 |
| 1.109495605 | 3.679575225 |
| 0.979814301 | 3.0935688   |
| 0.880212113 | 2.207745135 |
| 1.387242154 | 1.989696233 |
| 1.011530737 | 2.521190432 |
| 0.852575907 | 4.257722865 |
| 0.867026346 | 1.951456313 |
| 0.823675029 | 1.776461589 |
| 1.083782933 | 7.242497249 |
| 0.984043715 | 3.858798072 |
| 1.05792206  | 1.559939646 |
| 0.869524981 | 14.02577314 |
| 1.028937894 | 7.779816757 |
| 1.047960064 | 8.424704566 |
| 0.802848779 | 4.308399404 |
| 0.966223247 | 4.088863128 |
| 0.995502739 | 4.706308903 |
| 0.995502739 | 4.870961109 |

|             |             |
|-------------|-------------|
| 1.128903691 | 4.822656381 |
| 0.777037606 | 1.607552127 |
| 0.998409316 | 1.609751241 |
| 0.823421512 | 1.334580088 |
| 0.76460569  | 5.434630257 |
| 1.030783884 | 11.1350955  |
| 0.722606708 | 8.703610628 |
| 0.974736227 | 1.284818712 |
| 1.064912359 | 3.453813741 |
| 0.873921695 | 3.444730258 |
| 0.592489285 | 8.367401365 |
| 1.066480713 | 2.077997028 |
| 0.935927406 | 2.403243745 |
| 0.846791462 | 3.02836495  |
| 0.818288179 | 2.778316468 |
| 1.043000582 | 1.139109752 |
| 1.028100574 | 1.544098372 |
| 1.268379788 | 1.724938722 |
| 1.074392291 | 1.913719818 |
| 1.016211563 | 1.662282178 |
| 0.9713787   | 1.145438139 |
| 0.853091994 | 1.327031991 |
| 0.86805852  | 6.21075451  |
| 1.079195833 | 2.493364902 |
| 1.03422934  | 3.263786641 |
| 0.87064974  | 2.15718087  |
| 1.11248941  | 1.849012174 |
| 1.28169112  | 3.025656285 |
| 1.115825211 | 2.005890241 |
| 0.877195978 | 1.571046902 |
| 1.317775585 | 1.318557221 |
| 1.075426052 | 1.879645401 |
| 0.97086027  | 1.318557221 |
| 1.086884168 | 2.528423199 |
| 0.87256898  | 3.174575794 |
| 0.674588791 | 5.795373864 |
| 1.474077159 | 1.533242115 |
| 0.76774852  | 3.938603597 |
| 0.739295972 | 2.183352059 |
| 1.251394708 | 2.732711609 |
| 0.915729678 | 3.540580518 |
| 0.729479574 | 1.692707817 |
| 3.699669762 | 4.372828528 |

|             |             |
|-------------|-------------|
| 0.886055363 | 2.200520162 |
| 0.93849197  | 2.327473249 |
| 0.927176299 | 1.819660904 |
| 0.899712962 | 1.935222288 |
| 0.064574675 | 5.904546835 |
| 0.759972289 | 1.370193883 |
| 0.806575737 | 4.209461619 |
| 1.611887377 | 8.221163297 |
| 0.941839991 | 2.005850839 |
| 1.819448252 | 1.754051612 |
| 0.626477622 | 1.626741414 |
| 0.759057027 | 1.867216232 |
| 1.710812811 | 2.192564515 |
| 1.093974295 | 0.878261054 |
| 1.617019454 | 1.671529102 |
| 1.362148256 | 1.614867099 |
| 1.804209022 | 1.884011615 |
| 1.740722126 | 4.9154288   |
| 1.8943263   | 3.683030225 |
|             | 2.379804145 |
|             | 4.071232879 |
|             | 1.390177081 |
|             | 2.532158415 |
|             | 6.074335074 |
|             | 1.963134052 |
|             | 1.453067383 |
|             | 2.151109558 |
|             | 4.743837634 |
|             | 1.768979711 |
|             | 7.546695702 |
|             | 1.854575503 |
|             | 3.13851239  |
|             | 1.585771482 |
|             | 3.62870231  |
|             | 4.985894118 |
|             | 2.31436919  |
|             | 1.430655137 |
|             | 1.917077884 |
|             | 3.825290597 |
|             | 1.692989533 |
|             | 1.649947426 |
|             | 6.51370549  |
|             | 4.137945167 |

1.508625842  
1.666672359  
6.910943143  
2.801733707  
2.273370368  
2.93523769  
3.338113451  
1.784164086  
2.618692449  
3.242032612  
1.642629857  
1.54176662  
1.356392436  
7.849760479  
1.240954782  
1.51511921  
1.587267744  
1.314989958  
2.629979916  
1.329440397  
2.817835625  
2.398772891  
2.037511913  
1.765490194  
1.302410799  
7.004075852  
12.27160397  
1.562892959  
1.652097464  
3.98532283  
1.639968448  
2.481722165  
2.075358301  
1.785098399  
1.668994438  
1.889415795  
1.831279924  
3.182938915  
1.308057089  
3.052133207  
1.761155108  
6.666190407  
1.909468457



4.737230905  
1.617946555  
5.247394233  
3.396230157  
1.836587982  
1.428457319  
1.690827031  
3.459548375  
1.634892059  
1.593412953  
6.022808594  
5.174937482  
4.575580316  
2.090440847  
1.595732332  
4.39832607  
4.500953679  
1.735066758  
1.690954891  
3.69069285  
1.813890309  
6.252760089  
2.174196067  
1.641739887  
4.407553931  
2.207022587  
2.058900266  
6.472945439  
5.013918728  
1.616914619  
2.837494198  
1.723294906  
4.87230272  
1.758200981  
3.00980168  
2.044329776  
1.344985892  
2.884247524  
1.80825881  
3.756598079  
1.5415522  
1.16912882  
2.757944908

1.62120986  
1.801344289  
1.981478718  
5.899402547  
4.630361329  
2.089676054  
1.716400659  
2.619769426  
1.59595149  
1.326927277  
3.603813856  
1.117500624  
2.05378493  
2.929663797  
5.021190773  
1.588027202  
1.300669899  
4.249863275  
1.542654996  
1.242041356  
1.729344857  
3.286567644  
1.658499413  
1.551990276  
3.53536561  
2.945521371  
1.96876817  
2.919427921  
1.421501553  
1.757770738  
1.729829733  
1.637980366  
1.990069604  
2.836339236  
1.47183009  
2.610344969  
6.08056828  
5.988438457  
3.111203881  
1.432385945  
1.663415936  
3.758087856  
4.427153545

1.110644792  
2.26756645  
2.847047743  
5.709568572  
1.645209252  
0.761696716  
2.105059315  
1.325407717  
1.764748656  
3.441137224  
2.250740693  
1.639468  
0.930082808  
1.267087321  
1.678890701  
6.964108777  
3.474122602  
11.74972084  
3.041389698  
10.62344243  
1.47380517  
0.958631391  
1.982254741  
0.976456856  
5.020602478  
9.745772161  
5.578388106  
4.512556327  
1.941215726  
2.644938662  
1.679077666  
2.191584838  
9.341547587  
0.579585069  
0.936388454  
1.539235642  
3.205719828  
6.779503784  
7.272062609  
9.378199419  
0.907444116  
2.087406826  
4.899810427

1.367820764
