# Supplementary material for: The O-GlcNAc transferase OGT is a conserved and essential regulator of the cellular and organismal response to hypertonic stress
Source: PubMed Central journal article supplement (PMC7556452; doi:10.1371/journal.pgen.1008821), 2020-10-02
Supplement: pgen.1008821.s020.pdf [file pgen.1008821.s020.pdf]

| WT          | dr15        | dr20        | ok430       | ok1474      |
|-------------|-------------|-------------|-------------|-------------|
| 1.032768863 | 0.219894853 | 0.299428326 | 0.226631986 | 0.343054718 |
| 0.866534878 | 0.181284119 | 0.247101046 | 0.465932462 | 0.249126815 |
| 0.796211839 | 0.21614395  | 0.218030334 | 0.405140983 | 0.278605522 |
| 0.995957348 | 0.254676594 | 0.273264686 | 0.407435045 | 0.285624747 |
| 1.289559158 | 0.181810252 | 0.305242468 | 0.462385812 | 0.28876348  |
| 1.003669972 | 0.226109273 | 0.276171757 | 0.318879631 | 0.354232158 |
| 0.818272578 | 0.228274478 | 0.247101046 | 0.471243609 | 0.260867986 |
| 0.884569512 | 0.176630051 | 0.255822259 | 0.522962595 | 0.42961092  |
| 1.151245071 | 0.161979597 | 0.290707113 | 0.545288561 | 0.295697473 |
| 1.079262374 | 0.252333417 | 0.235472761 | 0.543235936 | 0.328343678 |
| 1.141669944 | 0.259750075 | 0.177331339 | 0.474812586 | 0.332898123 |
| 1.058849948 | 0.218735311 | 0.247101046 | 0.393382424 | 0.317513027 |
| 1.03501418  | 0.242825307 | 0.223844477 | 0.128356878 | 0.369000922 |
| 0.827756508 | 0.216149649 | 0.247101046 | 0.459957145 | 0.234060912 |
| 0.612782222 | 0.223930396 | 0.238379832 | 0.472363642 | 0.315036305 |
| 0.598288186 | 0.237151819 | 0.287800041 | 0.371224557 | 0.279088711 |
| 0.96042444  | 0.255019996 | 0.28489297  | 0.333574162 | 0.520412028 |
| 1.134835376 | 0.340040302 | 0.273264686 | 0.58053202  | 0.236512799 |
| 0.915461405 | 0.215592562 | 0.287800041 | 0.310512171 | 0.330340647 |
| 0.856455114 | 0.242741255 | 0.212216192 | 0.534331347 | 0.318759593 |
| 0.858082057 | 0.247779621 | 0.270357615 | 0.289119126 | 0.327145001 |
| 0.886862449 | 0.215592562 | 0.296521255 | 0.48575577  | 0.351015028 |
| 0.997449209 | 0.181825053 | 0.209309121 | 0.38820129  | 0.353719304 |
| 0.98816233  | 0.25479121  | 0.244193975 | 0.536502907 | 0.308727186 |
| 0.850040723 | 0.226574489 | 0.215123263 | 0.410300827 | 0.280290409 |
| 0.85739313  | 0.305422797 | 0.235472761 | 0.50980951  | 0.314323199 |
| 1.301123815 | 0.283783181 | 0.267450544 | 0.384973615 | 0.293987953 |
| 0.869266464 | 0.240555912 | 0.28489297  | 0.493452217 | 0.34612784  |
| 0.880421317 | 0.217861958 | 0.209309121 | 0.318325058 | 0.406589419 |
| 0.880919216 | 0.244472563 | 0.28489297  | 0.452737914 | 0.353142391 |
| 1.162823084 | 0.276183936 | 0.276171757 | 0.236575188 | 0.258759053 |
| 0.783446309 | 0.193289883 | 0.270357615 | 0.430634548 | 0.265596182 |
| 0.882391432 | 0.213638551 | 0.287800041 | 0.719673296 | 0.276836293 |
| 1.132137975 | 0.321870586 | 0.209309121 | 0.349183099 | 0.315881292 |
| 1.008206595 | 0.208637964 | 0.25872933  | 0.743097202 | 0.253464926 |
| 1.030394681 | 0.2378186   | 0.279078828 | 0.329095455 | 0.398605623 |
| 0.817199969 | 0.318184885 | 0.215123263 | 0.378958402 | 0.301967473 |
| 1.070610121 | 0.262018099 | 0.28489297  | 0.635520302 | 0.291194031 |
| 0.949051873 | 0.223147019 | 0.261636401 | 0.15741349  | 0.21838719  |
| 0.986606311 | 0.266759864 | 0.218030334 | 0.418551071 | 0.259991757 |
| 1.006711397 | 0.282395891 | 0.337220251 | 0.498059614 | 0.28059195  |
| 0.915310765 | 0.360992197 | 0.281985899 | 0.50527787  | 0.326004129 |

|             |             |             |             |             |
|-------------|-------------|-------------|-------------|-------------|
| 1.03604395  | 0.212309427 | 0.209309121 | 0.558286932 | 0.341078837 |
| 1.659244288 | 0.167826546 | 0.218030334 | 0.587074902 | 0.382156558 |
| 1.037273151 | 0.255517111 | 0.247101046 | 0.508148767 | 0.367908799 |
| 1.012550823 | 0.214236634 | 0.238379832 | 0.341062562 | 0.41082709  |
| 1.080701076 | 0.21239386  | 0.20640205  | 0.201613337 | 0.56882245  |
| 1.085464376 | 0.242238834 | 0.197680837 | 0.415049679 | 0.306590666 |
| 1.129657244 | 0.166457513 | 0.168610125 | 0.573750104 | 0.373106882 |
| 0.972524578 | 0.255605586 | 0.218030334 | 0.11760778  | 0.337505491 |
| 0.810520086 | 0.206841573 | 0.270357615 | 0.337989926 | 0.305591999 |
| 0.826026242 | 0.283408063 | 0.261636401 | 0.588313044 | 0.279981476 |
| 0.96982194  | 0.275224548 | 0.270357615 | 0.532264301 | 0.736033001 |
| 0.757131227 | 0.197677994 | 0.281985899 | 0.969335703 | 0.253378555 |
| 0.938484267 | 0.183377582 | 0.261636401 | 0.306343619 | 0.310651469 |
| 0.72508865  | 0.222622755 | 0.270357615 | 0.378958402 | 0.298240041 |
| 1.266301665 | 0.249962391 | 0.273264686 | 0.250497927 | 0.327798441 |
| 1.090570594 | 0.227352157 | 0.209309121 | 0.378958402 | 0.285974606 |
| 0.915869237 | 0.229237661 | 0.235472761 | 0.440080725 | 0.365519781 |
| 1.054384071 | 0.20170694  | 0.287800041 | 0.430634548 | 0.287496105 |
| 0.939333351 | 0.191637833 | 0.273264686 | 0.414485752 | 0.212841957 |
| 1.027752429 | 0.229208935 | 0.212216192 | 0.346256408 | 0.248192444 |
| 0.930081523 | 0.22897417  | 0.226751548 | 0.400102004 |             |
| 1.118631343 | 0.214945137 | 0.279078828 | 0.40960945  |             |
| 0.947534627 | 0.212223929 | 0.241286903 | 0.555218124 |             |
| 0.871372866 | 0.170010135 | 0.270357615 | 0.843488057 |             |
| 0.777810057 | 0.240868932 | 0.229658619 | 0.321855081 |             |
| 1.28168223  | 0.270140078 | 0.229658619 | 0.348813984 |             |
| 0.935294049 | 0.200910632 | 0.197680837 | 0.709243248 |             |
| 0.999207198 | 0.236239511 | 0.299428326 | 0.413409166 |             |
| 1.091493811 | 0.232787061 | 0.247101046 | 0.185360088 |             |
| 1.347513315 | 0.220414121 | 0.209309121 | 0.364302552 |             |
| 0.76741131  | 0.223930396 | 0.226751548 | 0.395677155 |             |
| 0.912732131 | 0.184793625 | 0.183145481 | 0.597520458 |             |
| 1.11372115  | 0.161968016 | 0.247101046 | 0.646137707 |             |
| 0.819087874 | 0.174629975 | 0.267450544 | 0.376232083 |             |
| 0.874907196 | 0.22212567  | 0.250008117 | 0.223794332 |             |
| 0.931457393 | 0.178649591 | 0.261636401 | 0.409275074 |             |
| 0.903265532 | 0.271705695 | 0.226751548 | 0.205269135 |             |
| 1.092804437 | 0.183253678 | 0.261636401 | 0.196983328 |             |
| 0.971546429 | 0.170438958 | 0.250008117 | 0.580958255 |             |
| 1.272954146 | 0.25785157  | 0.276171757 | 0.378958402 |             |
| 0.817459873 | 0.266857243 | 0.220937406 | 0.367812567 |             |
| 1.102033641 | 0.196602544 | 0.267450544 | 0.319582431 |             |
| 1.004936631 | 0.2628176   | 0.255822259 | 0.476127223 |             |

|             |             |             |             |
|-------------|-------------|-------------|-------------|
| 1.039852525 | 0.243232634 | 0.223844477 | 0.462798757 |
| 0.835940741 | 0.201429547 | 0.264543472 | 0.273287309 |
| 0.925051577 | 0.220124538 | 0.287800041 | 0.392738708 |
| 0.899108873 | 0.163593272 | 0.267450544 | 0.558963643 |
| 0.873325085 | 0.17247405  | 0.273264686 | 0.525804783 |
| 0.744512373 | 0.249490764 | 0.261636401 | 0.304520145 |
| 0.991969706 | 0.266857243 | 0.215123263 | 0.410300827 |
| 1.175470552 | 0.190428762 | 0.241286903 | 0.296576141 |
| 1.100398741 | 0.157701967 | 0.200587908 | 0.315798669 |
| 0.753195215 | 0.200697076 | 0.20640205  | 0.564722325 |
| 1.070134421 | 0.189777272 | 0.334313179 | 0.524711634 |
| 0.761013951 | 0.239396158 | 0.215123263 | 0.275243471 |
| 0.984970148 | 0.252401049 | 0.197680837 | 0.489603191 |
| 0.869127462 | 0.210157456 | 0.209309121 | 0.378958402 |
| 1.00137746  | 0.265344692 | 0.218030334 | 0.412750871 |
| 1.050440047 | 0.232082645 | 0.23256569  | 0.301619953 |
| 1.086661594 | 0.244067052 | 0.244193975 | 0.543481806 |
| 1.048338412 | 0.26331916  | 0.15407477  | 0.135342287 |
| 1.266474053 | 0.241702388 | 0.250008117 | 0.41725739  |
| 0.98940235  | 0.296815807 | 0.223844477 | 0.441029175 |
| 1.035129562 | 0.237772867 | 0.261636401 | 0.564226954 |
| 0.953356321 | 0.207073707 | 0.235472761 | 0.402643302 |
| 1.027768679 | 0.238663353 | 0.194773765 | 0.419992115 |
| 1.307004219 | 0.222859727 | 0.235472761 | 0.371670741 |
| 2.033982362 | 0.262304284 | 0.223844477 | 0.319122865 |
| 1.245835592 | 0.234372402 | 0.305242468 | 0.442496338 |
| 1.006547225 | 0.211192714 | 0.165703054 | 0.396833799 |
| 0.989720598 | 0.228920103 | 0.287800041 | 0.548280242 |
| 0.975128763 | 0.17423849  | 0.250008117 | 0.422804829 |
| 0.999207198 | 0.22935379  | 0.244193975 | 0.441175453 |
| 0.899489076 | 0.209471638 | 0.25872933  | 0.25538501  |
| 1.093415486 | 0.273355098 | 0.244193975 | 0.194465496 |
| 1.276954333 | 0.258178747 | 0.218030334 | 0.371454275 |
| 1.000517313 | 0.188759153 | 0.299428326 | 0.263422304 |
| 0.882622427 | 0.226939539 | 0.244193975 | 0.220587727 |
| 0.999893938 | 0.202284379 | 0.194773765 | 0.223125041 |
| 0.975446653 | 0.222372203 | 0.188959623 | 0.533635301 |
| 1.12488068  | 0.276881418 | 0.183145481 | 0.490416756 |
| 0.967069137 | 0.20429728  | 0.276171757 | 0.476754119 |
| 1.401903534 | 0.236125187 | 0.215123263 | 0.557291768 |
| 1.140613277 | 0.234940613 | 0.197680837 | 0.378958402 |
| 1.178446427 | 0.199391965 | 0.267450544 | 0.718026446 |
| 1.204495523 | 0.185609491 | 0.183145481 | 0.213698347 |

|             |             |             |             |
|-------------|-------------|-------------|-------------|
| 1.101766694 | 0.167961647 | 0.229658619 | 0.625281364 |
| 1.271824553 | 0.246029159 | 0.235472761 | 0.673703826 |
| 0.995040084 | 0.249962391 | 0.215123263 | 0.715131178 |
| 0.923455765 | 0.204111302 | 0.200587908 | 0.307263569 |
| 0.933453617 | 0.214018894 | 0.325591966 | 0.476754119 |
| 1.156023556 | 0.199459786 | 0.305242468 | 0.484843838 |
| 0.758999394 | 0.272901978 | 0.235472761 | 0.39461784  |
| 0.988233367 | 0.207553518 | 0.354662677 | 0.330308337 |
| 1.175875271 | 0.198783651 | 0.31105661  | 0.7171059   |
| 0.8022892   | 0.23845844  | 0.215123263 | 0.449462291 |
| 0.827357892 | 0.212963385 | 0.194773765 | 0.580794943 |
| 0.701175624 | 0.213170174 | 0.244193975 | 0.535955455 |
| 0.94459007  | 0.239986828 | 0.197680837 | 0.32742006  |
| 1.220209551 | 0.199480663 | 0.212216192 | 0.465577466 |
| 1.208609663 | 0.179086473 | 0.197680837 | 0.178517594 |
| 1.144615429 | 0.224490033 | 0.226751548 | 0.277286636 |
| 1.12488068  | 0.23973227  | 0.223844477 | 0.382403479 |
| 1.049401673 | 0.266676744 | 0.252915188 | 0.781601705 |
| 1.042221716 | 0.179555096 | 0.226751548 | 0.496090999 |
| 0.892188321 | 0.256380344 | 0.264543472 | 0.378958402 |
| 0.99295023  | 0.245556274 | 0.23256569  | 0.364772794 |
| 1.115671131 | 0.167895093 | 0.247101046 | 0.211342186 |
| 0.951241381 | 0.205440004 | 0.264543472 | 1.057558332 |
| 0.858399513 | 0.293989858 | 0.226751548 | 0.419926878 |
| 1.189632848 | 0.195429229 | 0.203494979 | 0.416479036 |
| 1.053390209 | 0.25017567  | 0.212216192 | 0.613020945 |
| 0.716104412 | 0.30472447  | 0.200587908 | 0.196012967 |
| 1.211409963 | 0.199008519 | 0.226751548 | 0.475901249 |
| 1.477116045 | 0.198606482 | 0.238379832 | 0.271299765 |
| 0.633833696 | 0.195023661 | 0.20640205  | 0.326851622 |
| 1.239664423 | 0.215592562 | 0.247101046 | 0.279232507 |
| 0.984022606 | 0.288562353 | 0.145353556 | 0.578410193 |
| 0.578464281 | 0.195358956 | 0.279078828 | 0.578072139 |
| 0.771622332 | 0.214846567 | 0.165703054 | 0.132635441 |
| 0.909567385 | 0.2303805   | 0.264543472 | 0.548836307 |
| 1.043023166 | 0.223798508 | 0.203494979 | 0.194337642 |
| 0.769298243 | 0.295397544 | 0.212216192 | 0.322114642 |
| 0.751781298 | 0.253638309 | 0.191866694 | 0.277902828 |
| 0.921182564 | 0.168026295 | 0.220937406 | 0.113687521 |
| 1.217870816 | 0.143728375 | 0.212216192 | 0.643964278 |
| 1.196361392 | 0.224966152 | 0.223844477 | 0.366430852 |
| 1.29629107  | 0.17709389  | 0.203494979 | 0.384788532 |
| 1.17088807  | 0.210287153 | 0.194773765 | 0.160123269 |

|             |             |             |             |
|-------------|-------------|-------------|-------------|
| 0.752165724 | 0.167748733 | 0.229658619 | 0.503975607 |
| 0.943320991 | 0.182084041 | 0.218030334 | 0.568437603 |
| 1.068636646 | 0.185155965 | 0.226751548 | 0.321540463 |
| 0.67207404  | 0.17247405  | 0.241286903 | 0.340232726 |
| 1.035101471 | 0.255394266 | 0.247101046 | 0.367298144 |
| 0.848347513 | 0.306002347 | 0.220937406 | 0.456409755 |
| 1.051268857 | 0.264317816 | 0.191866694 | 0.582301935 |
| 1.202078374 | 0.219331162 | 0.215123263 | 0.624656707 |
| 0.943448312 | 0.222925643 | 0.296521255 |             |
| 0.859422113 | 0.227112776 | 0.188959623 | 0.467382029 |
| 0.920470924 | 0.207300541 | 0.273264686 | 0.655889542 |
| 1.098673783 | 0.246021543 | 0.18023841  | 0.485540453 |
| 1.348501538 | 0.166819163 | 0.218030334 | 0.55171885  |
| 0.943120299 | 0.192977958 | 0.165703054 | 0.169121932 |
| 0.820154695 | 0.185573345 | 0.200587908 | 0.251170104 |
| 0.975773689 | 0.258711075 | 0.226751548 | 0.468125085 |
| 0.744446582 | 0.286278648 | 0.209309121 | 0.258737116 |
| 0.982815004 | 0.228859797 | 0.197680837 | 0.332743963 |
| 1.324035379 | 0.254244615 | 0.20640205  | 0.241460221 |
| 0.927694512 | 0.203044847 | 0.229658619 | 0.474995806 |
| 0.951911412 | 0.203296409 | 0.203494979 | 0.327944771 |
| 1.108045731 | 0.181889507 | 0.218030334 | 0.660616674 |
| 1.115204287 | 0.181881725 | 0.255822259 |             |
| 0.783469526 | 0.243288332 | 0.203494979 |             |
| 1.424218676 | 0.156304608 | 0.293614184 |             |
| 0.637563034 | 0.188302365 | 0.174424268 |             |
| 0.831108423 | 0.316313412 | 0.241286903 |             |
| 0.90108243  | 0.217511784 | 0.261636401 |             |
| 0.809648631 | 0.179972922 | 0.287800041 |             |
| 0.909195594 | 0.17171924  | 0.220937406 |             |
| 1.072671028 | 0.18402043  | 0.357569748 |             |
| 1.003452279 | 0.21763287  | 0.247101046 |             |
| 0.980817014 | 0.265072823 | 0.25872933  |             |
| 0.830719964 | 0.206101066 | 0.197680837 |             |
| 0.952047451 | 0.17438512  | 0.209309121 |             |
| 1.142478092 | 0.243629263 | 0.171517196 |             |
| 0.717537525 | 0.203509203 | 0.200587908 |             |
| 0.963108542 | 0.19466597  | 0.255822259 |             |
| 1.137810343 | 0.276730752 | 0.188959623 |             |
| 0.929653455 | 0.22739116  | 0.226751548 |             |
| 1.126224624 | 0.25290666  | 0.264543472 |             |
| 1.082811972 | 0.212717995 | 0.159888912 |             |
| 1.146680693 | 0.22482026  | 0.276171757 |             |

|             |             |             |
|-------------|-------------|-------------|
| 1.020804267 | 0.257470254 | 0.220937406 |
| 0.82948761  | 0.220529797 | 0.212216192 |
| 0.96965521  | 0.269490703 | 0.168610125 |
| 0.854027058 | 0.230633904 | 0.244193975 |
| 0.881372027 | 0.202910647 | 0.215123263 |
| 0.82267393  | 0.235191886 | 0.252915188 |
| 1.151215679 | 0.170766386 | 0.20640205  |
| 1.071314934 | 0.177332474 | 0.244193975 |
| 0.936830718 | 0.184793625 | 0.209309121 |
| 0.794334877 | 0.245261264 | 0.197680837 |
| 0.97957089  | 0.250778292 | 0.191866694 |
| 1.107131084 | 0.168871459 | 0.218030334 |
| 0.893905181 | 0.209992756 | 0.194773765 |
| 1.111245763 | 0.201043371 | 0.244193975 |
| 1.067454339 | 0.201904146 | 0.255822259 |
| 1.042300154 | 0.116977668 | 0.18023841  |
| 1.820195275 | 0.154374921 | 0.212216192 |
| 1.173171012 | 0.302525047 | 0.191866694 |
| 0.694122801 | 0.239365126 | 0.247101046 |
| 0.93298927  | 0.21491246  | 0.220937406 |
| 1.054201276 | 0.226939539 | 0.133725272 |
| 1.177585933 | 0.257756421 | 0.226751548 |
| 0.761905484 | 0.248479563 | 0.235472761 |
| 0.876440775 | 0.208312813 | 0.177331339 |
| 1.206972564 | 0.306108524 | 0.23256569  |
| 0.96163269  | 0.161012167 | 0.267450544 |
| 1.12488068  | 0.259672826 | 0.188959623 |
| 1.22164461  | 0.21399558  | 0.168610125 |
| 1.062013097 | 0.213025984 | 0.267450544 |
| 1.07259539  | 0.212275754 | 0.188959623 |
| 1.072200318 | 0.195715234 | 0.220937406 |
| 1.282042227 | 0.207487579 | 0.203494979 |
| 1.138011583 | 0.204989649 | 0.191866694 |
| 0.757254639 | 0.236729088 | 0.215123263 |
| 1.232477963 | 0.244126872 | 0.223844477 |
| 0.910265287 | 0.266122069 | 0.25872933  |
| 0.9923366   | 0.355649044 | 0.165703054 |
| 0.941389505 | 0.230159627 | 0.203494979 |
| 0.976311534 | 0.223130764 | 0.215123263 |
| 1.229520743 | 0.248543391 | 0.171517196 |
| 0.999893938 | 0.284538407 | 0.215123263 |
| 1.04733933  | 0.189721455 | 0.165703054 |
| 1.114925984 | 0.188556839 | 0.156981841 |

|             |             |             |
|-------------|-------------|-------------|
| 1.118881317 | 0.216494623 | 0.177331339 |
| 0.759353415 | 0.235678826 | 0.130818201 |
| 1.039544904 | 0.22197104  | 0.197680837 |
| 0.911835097 | 0.235971959 | 0.273264686 |
| 0.804370123 | 0.211005487 | 0.229658619 |
| 1.034792833 | 0.192401331 | 0.244193975 |
| 0.803181849 | 0.30436597  | 0.203494979 |
| 1.060232365 | 0.181551631 | 0.20640205  |
| 0.849009042 | 0.236050251 | 0.226751548 |
| 1.190447496 | 0.184245276 | 0.183145481 |
| 1.000844407 | 0.297119162 | 0.252915188 |
| 0.993137898 | 0.196381344 | 0.293614184 |
| 1.163374696 | 0.268545121 | 0.191866694 |
| 1.036802775 | 0.236456359 | 0.20640205  |
| 0.986895317 | 0.341157461 | 0.212216192 |
| 0.979487939 | 0.243902697 | 0.165703054 |
| 0.98412274  | 0.205184646 | 0.203494979 |
| 0.904509319 | 0.198273492 | 0.212216192 |
| 0.966167357 | 0.229437956 | 0.203494979 |
| 0.958876617 | 0.204245585 | 0.203494979 |
| 1.015742401 | 0.252257964 | 0.25872933  |
| 1.014743848 | 0.233863118 | 0.200587908 |
| 1.171408592 | 0.158564852 | 0.174424268 |
| 0.813550068 | 0.227569927 | 0.244193975 |
| 0.861750697 | 0.231150788 | 0.188959623 |
| 0.909607019 | 0.185948585 | 0.177331339 |
| 0.799257325 | 0.234886838 | 0.162795983 |
| 1.022069005 | 0.225116732 | 0.18023841  |
| 1.28557792  | 0.254288663 | 0.194773765 |
| 0.917313412 | 0.236675747 | 0.165703054 |
| 0.902159944 | 0.195617533 | 0.194773765 |
| 0.832760504 | 0.266019297 | 0.264543472 |
| 1.202944072 | 0.192690788 | 0.191866694 |
| 0.886480042 | 0.214740418 | 0.241286903 |
| 0.795793247 | 0.183106012 | 0.177331339 |
| 1.262656763 | 0.209059454 | 0.142446485 |
| 0.708013134 | 0.177622529 | 0.191866694 |
| 0.953232221 | 0.209059454 | 0.168610125 |
| 1.112276975 | 0.264274754 | 0.223844477 |
| 0.94739167  | 0.216525863 | 0.145353556 |
| 0.710776254 | 0.209674335 | 0.165703054 |
| 1.027257899 | 0.200193094 | 0.191866694 |
| 0.741340128 | 0.249911378 | 0.200587908 |

|             |             |             |
|-------------|-------------|-------------|
| 1.279626171 | 0.183828141 | 0.252915188 |
| 1.034373039 | 0.216243899 | 0.148260627 |
| 1.057083444 | 0.171507809 | 0.162795983 |
| 1.302087911 | 0.197859841 | 0.194773765 |
| 1.013091296 | 0.214041537 | 0.212216192 |
| 0.985332376 | 0.167926053 | 0.220937406 |
| 0.835871222 | 0.199406935 | 0.156981841 |
| 1.345350856 | 0.206027022 | 0.151167699 |
| 1.18598531  | 0.214825329 | 0.162795983 |
| 0.837801757 | 0.188840201 | 0.148260627 |
| 0.985876733 | 0.258711075 | 0.12791113  |
| 0.830766896 | 0.222169963 | 0.159888912 |
| 0.998414805 | 0.230430917 | 0.156981841 |
| 0.952676724 | 0.16669528  | 0.098840418 |
| 0.872729726 | 0.207443015 | 0.20640205  |
| 1.070061934 | 0.19547059  | 0.119189916 |
| 0.903805864 | 0.333655156 | 0.133725272 |
| 0.702306456 | 0.224670144 | 0.281985899 |
| 0.868436492 | 0.183622563 | 0.165703054 |
| 0.885065129 | 0.195093597 | 0.159888912 |
| 1.275210356 | 0.175127497 | 0.090119205 |
| 1.139988968 | 0.2054745   | 0.191866694 |
| 0.966113737 | 0.236987244 | 0.171517196 |
| 1.471962823 | 0.213867822 | 0.145353556 |
| 0.744206774 | 0.217500461 | 0.162795983 |
| 0.841050028 | 0.232703083 | 0.159888912 |
| 0.953387243 | 0.142540537 | 0.156981841 |
| 1.057083444 | 0.274609521 | 0.122096987 |
| 1.131850201 | 0.240905049 | 0.125004058 |
| 0.877406931 | 0.230775137 | 0.305242468 |
| 0.988659175 | 0.203519379 | 0.122096987 |
| 0.933280125 | 0.246934212 | 0.267450544 |
| 1.297072716 | 0.176450397 | 0.156981841 |
| 0.944344275 | 0.234178128 | 0.075583849 |
| 0.932674177 | 0.276152271 | 0.183145481 |
| 0.913335955 | 0.225132056 | 0.197680837 |
| 1.00969682  | 0.215592562 | 0.040698996 |
| 1.162198997 | 0.180496099 |             |
| 0.811481088 | 0.253431257 |             |
| 1.102985192 | 0.267632146 |             |
| 0.909531901 | 0.186226134 |             |
| 0.785443001 | 0.245468685 |             |
| 0.845043107 | 0.201996635 |             |



|             |             |
|-------------|-------------|
| 1.120251542 | 0.182771008 |
| 0.851261055 | 0.217238307 |
| 1.001759412 | 0.179813371 |
| 0.831482799 | 0.171996282 |
| 0.977396324 | 0.25446991  |
| 0.974896589 | 0.150572583 |
| 1.003377889 | 0.211810237 |
| 1.22108758  | 0.245296426 |
| 0.916316177 | 0.168977954 |
| 1.025401436 | 0.181384148 |
| 0.963380957 | 0.210007263 |
| 1.163141928 | 0.267105829 |
| 0.856266141 | 0.249813604 |
| 1.096657867 | 0.164118906 |
| 0.95803235  | 0.199459786 |
| 0.960052406 | 0.234178128 |
| 1.042772601 | 0.260545905 |
| 1.169146818 | 0.207443015 |
| 0.968124733 | 0.228491263 |
| 1.020439704 | 0.238029797 |
| 0.910617693 | 0.200551221 |
| 0.921777224 | 0.243792433 |
| 0.91564873  | 0.220937832 |
| 1.079717404 | 0.231639905 |
| 0.887564081 | 0.199887144 |
| 1.184587723 | 0.261324318 |
| 0.955065866 | 0.181551631 |
| 0.874180529 | 0.180861846 |
| 0.760672001 | 0.244338237 |
| 1.08533942  | 0.267334777 |
| 0.752087854 | 0.186901537 |
| 0.699364018 | 0.160185822 |
| 1.094839356 | 0.28745675  |
| 1.134776991 | 0.219185772 |
| 1.038533372 | 0.295849648 |
| 0.96964237  | 0.257374067 |
| 0.54029702  | 0.244870565 |
| 0.782777793 | 0.301210661 |
| 0.963806217 | 0.194845161 |
| 0.86618719  | 0.243629263 |
| 1.061542804 | 0.212512669 |
| 0.786771581 | 0.161045047 |
| 0.99413797  | 0.275529084 |

|             |             |
|-------------|-------------|
| 0.909217282 | 0.198749393 |
| 1.370999948 | 0.222448863 |
| 0.687341592 | 0.086237025 |
| 1.264328698 | 0.20338921  |
| 1.180430343 | 0.210939485 |
| 1.269602171 | 0.261714354 |
| 1.304512789 | 0.266924125 |
| 0.700879334 | 0.273929373 |
| 1.059670206 | 0.226665292 |
| 0.8426304   | 0.222661171 |
| 0.766523858 | 0.208687462 |
| 0.859160834 | 0.306002347 |
| 0.961620486 | 0.20828434  |
| 1.300320786 | 0.244338237 |
| 0.986977375 | 0.190852432 |
| 0.968647252 | 0.206609539 |
| 0.935413145 | 0.261198681 |
| 0.849909847 | 0.228160739 |
| 1.363491734 | 0.186458432 |
| 0.931273766 | 0.17247405  |
| 0.744807359 | 0.212692214 |
| 0.708354424 | 0.232176606 |
| 1.065141254 | 0.274880517 |
| 0.884688767 | 0.291747149 |
| 1.15787718  | 0.210434846 |
| 1.179167851 | 0.197761599 |
| 0.742326322 | 0.251524656 |
| 1.231753402 | 0.148954861 |
| 1.27456836  | 0.233811652 |
| 0.911519474 | 0.288872793 |
| 1.098431204 | 0.259441897 |
| 1.130685018 | 0.191236917 |
| 1.101542907 | 0.211192714 |
| 1.000802932 | 0.202118027 |
| 0.895136264 | 0.218909371 |
| 1.163242948 | 0.174448944 |
| 0.847949271 | 0.257905121 |
| 1.063716955 | 0.214726729 |
| 0.955942556 | 0.332548005 |
| 0.889698526 | 0.306719315 |
| 0.821830634 | 0.232962579 |
| 0.658119846 | 0.190393432 |
| 1.386013695 | 0.216365296 |

|             |             |
|-------------|-------------|
| 1.104049556 | 0.198282211 |
| 1.079885453 | 0.213400096 |
| 1.033921742 | 0.17247405  |
| 1.008513713 | 0.27274966  |
| 0.838668436 | 0.37944291  |
| 0.688756729 | 0.193067966 |
| 1.127929137 | 0.223201712 |
| 0.867832474 | 0.322613331 |
| 1.0944785   | 0.176117868 |
| 0.803806953 | 0.215592562 |
| 1.185685041 | 0.184793625 |
| 1.109547734 | 0.228175786 |
| 0.694141246 | 0.405821294 |
| 0.912403218 | 0.17799813  |
| 0.892347206 | 0.1805685   |
| 1.237368748 | 0.253321261 |
| 0.770579419 | 0.220259068 |
| 0.693322683 | 0.13541351  |
| 0.950260214 | 0.189649889 |
| 0.985744495 | 0.256876244 |
| 1.060556959 | 0.247583717 |
| 1.129398273 | 0.216915216 |
| 1.177710128 | 0.258711075 |
| 1.160722467 | 0.194728766 |
| 1.05818815  | 0.217059178 |
| 1.022391552 | 0.311780013 |
| 1.164350178 | 0.4106525   |
| 0.766152498 | 0.236848167 |
| 1.295979036 | 0.204776882 |
| 1.017559909 | 0.164435005 |
| 1.077046248 | 0.183128817 |
| 0.964641267 | 0.239746086 |
| 0.769211012 | 0.215592562 |
| 0.917150102 | 0.203176237 |
| 1.004843908 | 0.175035546 |
| 1.086841237 | 0.165386075 |
| 1.210160443 | 0.20708233  |
| 0.991983385 | 0.258711075 |
| 1.108578062 | 0.230322489 |
| 1.051518897 |             |
| 1.006398824 |             |
| 1.038351397 |             |
| 1.16835433  |             |

1.034164496  
0.740117572  
1.223084549  
0.893944911  
0.780633919  
0.849755065  
0.881850904  
1.224553652  
1.12488068  
0.747213159  
0.988906092  
0.960708905  
0.897792092  
1.129398273  
0.997394203  
1.0649912  
0.864194046  
1.282247407  
0.96418344  
1.142283897  
1.413566872  
1.439309211  
0.855999575  
0.91760453  
1.136417918  
0.760633603  
1.086024698  
0.781023145  
1.177445198  
1.01997491  
1.332760184  
0.866144288  
1.107178695  
1.138325469  
1.14625147  
1.373495613  
1.313991055  
0.915065391  
1.031682474  
1.368518431  
1.33702923  
0.876562649  
0.982290171

0.956898499  
1.051359067  
1.042746535  
0.902446647  
1.039523881  
0.86663959  
1.081017408  
1.054083994  
0.963727561  
0.92623404  
0.976041506  
1.010654386  
1.120667644  
0.111595306  
0.872247903  
0.973817567  
0.943865398  
0.875351988  
1.060601784  
1.004455498  
1.151764621  
1.12488068  
1.049349124  
1.046457626  
0.999893938  
1.138871733  
0.766626602  
1.022352493  
1.065062123  
0.776025279  
1.001623858  
1.067634844  
0.929456494  
1.048801794  
0.675854236  
1.239451861  
0.956148578  
1.126562116  
0.902682027  
0.963312452  
1.047357258  
0.977468876  
0.965850856

1.035101471  
0.967998211  
1.570145949  
1.051805364  
1.025906407  
0.859385966  
0.715961791  
1.244337036  
0.930158846  
0.67904885  
0.270913672  
1.042529602  
1.049184484  
0.115372377  
0.914537138  
0.902682027  
1.090162141  
0.911797556  
1.113852438  
1.499840907  
1.751722586  
1.273903334  
1.261229854  
0.943120299  
0.865024523  
0.972984611
