# Supplementary material for: The O-GlcNAc transferase OGT is a conserved and essential regulator of the cellular and organismal response to hypertonic stress
Source: PubMed Central journal article supplement (PMC7556452; doi:10.1371/journal.pgen.1008821), 2020-10-02
Supplement: pgen.1008821.s021.pdf [file pgen.1008821.s021.pdf]

| WT          | ogt-1(dr20) | ogt-1(dr20 dr36) |
|-------------|-------------|------------------|
| 1.064181663 | 0.245240481 | 1.038553647      |
| 0.951951413 | 0.234603234 | 0.955371429      |
| 0.671241578 | 0.284670483 | 0.79838268       |
| 1.168109779 | 0.218707723 | 0.653084277      |
| 0.732921307 | 0.263596652 | 0.712700962      |
| 1.02634713  | 0.224586841 | 1.142427089      |
| 0.864198829 | 0.2552472   | 0.772301565      |
| 0.951119208 | 0.318628234 | 0.638249516      |
| 0.977463257 | 0.233116041 | 0.910900234      |
| 1.294617992 | 0.261364194 | 0.547255898      |
| 0.997371285 | 0.290199097 | 0.6606727        |
| 1.134072843 | 0.224969768 | 1.04024416       |
| 1.154640522 | 0.309460021 | 0.843306137      |
| 0.708505013 | 0.210617489 | 0.714065907      |
| 0.93136509  | 0.28662329  | 0.972102219      |
| 0.992869679 | 0.327705962 | 0.689990477      |
| 0.827753637 | 0.317415328 | 1.130627412      |
| 1.006478685 | 0.247574386 | 1.19243567       |
| 1.130372634 | 0.280274836 | 0.952940629      |
| 1.079898282 | 0.266299719 | 0.754528221      |
| 1.135867811 | 0.261497117 | 0.727099208      |
| 1.154640522 | 0.22038705  | 0.76061686       |
| 0.750247899 | 0.210805005 | 0.982387714      |
| 0.731881642 | 0.170114126 | 0.832604863      |
| 0.565084046 | 0.206972186 | 0.683273164      |
| 1.102222254 | 0.215098115 | 0.888354579      |
| 1.066682376 | 0.248597877 | 0.683265993      |
| 0.973720794 | 0.340276306 | 0.818603614      |
| 0.911961651 | 0.289869423 | 0.794779111      |
| 1.069842855 | 0.269803029 | 0.670491786      |
| 0.914487623 | 0.234800379 | 0.59508857       |
| 1.567411494 | 0.245182436 | 0.715731705      |
| 0.993756201 | 0.266686851 | 0.591835732      |
| 1.074374557 | 0.326591093 | 0.913005256      |
| 1.04617912  | 0.24552133  | 0.751370276      |
| 0.825739719 | 0.295674552 | 0.890478276      |
| 1.036046967 | 0.255872208 | 0.770896866      |
| 0.927101822 | 0.291144719 | 0.929462065      |
| 1.078024081 | 0.279947182 | 0.375943341      |
| 0.903245102 | 0.259338643 | 0.794470289      |
| 1.022268127 | 0.216425243 | 0.773733268      |
| 1.154039459 | 0.277194892 | 0.692723862      |

|             |             |             |
|-------------|-------------|-------------|
| 0.831029318 | 0.27944316  | 0.640524779 |
| 1.217882014 | 0.303559207 | 0.713459541 |
| 1.107671802 | 0.21620334  | 0.807419614 |
| 1.05013306  | 0.265968931 | 0.976459737 |
| 1.03045182  | 0.22965407  | 0.65581723  |
| 1.242422926 | 0.273016075 | 1.022413002 |
| 0.890706163 | 0.279122796 | 0.730218162 |
| 0.834299145 | 0.216658077 | 0.700031502 |
| 1.079950367 | 0.216524749 | 0.750196626 |
| 1.077948946 | 0.254474    | 1.302525289 |
| 1.074102917 | 0.263838307 | 0.639535267 |
| 0.863265504 | 0.199246309 | 0.662832673 |
| 1.043604294 | 0.183975277 | 0.630088188 |
| 0.946327436 | 0.26753507  | 0.888587966 |
| 1.208650255 | 0.274668183 | 0.804732197 |
| 1.058962345 | 0.317078602 | 0.843374349 |
| 0.849818661 | 0.215970977 | 0.881972877 |
| 1.389854258 | 0.242837403 | 0.813086457 |
| 1.002379806 | 0.21048019  | 0.781818724 |
| 1.067577512 | 0.224456138 | 0.810359695 |
| 1.207588639 | 0.230919381 | 0.880865566 |
| 1.007530544 | 0.200371707 | 0.744591372 |
| 1.00614907  | 0.256425718 | 0.69613304  |
| 0.690322324 | 0.295674552 | 1.060939004 |
| 0.666763582 | 0.244840914 | 0.959553824 |
| 1.044972218 | 0.16604112  | 0.613067703 |
| 0.838176908 | 0.241541417 | 0.768891747 |
| 1.088106146 | 0.258715233 | 1.150453509 |
| 0.961426339 | 0.28603299  | 0.806264014 |
| 0.918564496 | 0.305824574 | 0.78526194  |
| 1.288726463 | 0.320852079 | 0.623178019 |
| 1.372887754 | 0.270957279 | 0.795362501 |
| 0.978208725 | 0.32173561  | 0.800428816 |
| 1.074066066 | 0.224258802 | 0.677328314 |
| 1.291687296 | 0.160916713 | 0.672636592 |
| 0.919625194 | 0.257253565 | 0.738022501 |
| 0.733386633 | 0.24349669  | 0.764353408 |
| 1.335739289 | 0.206972186 | 0.097183358 |
| 0.761301443 | 0.236895876 | 0.683135988 |
| 1.242049917 | 0.307728431 | 0.689257614 |
| 0.814728854 | 0.273274965 | 0.780067677 |
| 1.229100339 | 0.199326776 | 0.813699887 |
| 1.067311291 | 0.250960825 | 0.815587822 |

|             |             |             |
|-------------|-------------|-------------|
| 1.102599716 | 0.261870297 | 0.731574724 |
| 1.046470049 | 0.208361261 | 0.842362169 |
| 0.657469596 | 0.294449381 | 0.640920849 |
| 1.154878151 | 0.281382126 | 0.940508373 |
| 1.050402383 | 0.320390381 | 1.065576426 |
| 0.993290261 | 0.245606994 | 0.677065235 |
| 1.030204175 | 0.232223695 | 0.760123982 |
| 1.143533937 | 0.306513062 | 0.7470043   |
| 1.145661016 | 0.208871014 | 0.680899792 |
| 1.109507319 | 0.290180599 | 0.980761322 |
| 0.77229506  | 0.265348957 | 0.76126491  |
| 1.330914854 | 0.26465296  | 0.697598234 |
| 1.200524651 | 0.244805812 | 0.740094329 |
| 1.075877983 | 0.245346969 | 0.91268161  |
| 1.064349357 | 0.222639404 | 1.189398907 |
| 1.058462481 | 0.223692647 | 0.826633999 |
| 0.903824074 | 0.30553037  | 0.89992036  |
| 1.067112254 | 0.228077903 | 0.681029561 |
| 0.901211027 | 0.287313575 | 0.660340914 |
| 0.992611321 | 0.226550636 | 0.868559441 |
| 1.142835193 | 0.241719342 | 0.764613583 |
| 1.27827902  | 0.17390225  | 0.669358692 |
| 0.739698526 | 0.266014409 | 0.820558099 |
| 0.884448274 | 0.213059604 | 0.936415647 |
| 1.07289606  | 0.237424453 | 0.83285295  |
| 0.660446134 | 0.248764647 | 0.849710495 |
| 1.12250547  | 0.218813879 | 0.647889055 |
| 1.199823495 | 0.311401922 | 0.667305543 |
| 0.942425819 | 0.239257541 | 0.745958227 |
| 0.71526404  | 0.309702907 | 0.869081412 |
| 1.054115835 | 0.307752761 | 0.859973553 |
| 0.890512292 | 0.220770332 | 0.780037935 |
| 0.935480801 | 0.260264426 | 1.070437961 |
| 1.57283192  | 0.235865739 | 0.556204329 |
| 1.420796596 | 0.18726055  | 0.792932604 |
| 1.266275189 | 0.232590893 | 0.648680657 |
| 0.653067167 | 0.3197604   | 0.743223098 |
| 0.96341687  | 0.197252498 | 0.720793623 |
| 0.84265216  | 0.276354908 | 1.33309172  |
| 0.889784849 | 0.182622517 | 0.654312012 |
| 0.833164706 | 0.134616056 | 0.828781665 |
| 1.086033563 | 0.376313066 | 0.87518847  |
| 0.837242104 | 0.202568523 | 0.732847028 |

|             |             |             |
|-------------|-------------|-------------|
| 1.042490099 | 0.272484391 | 0.659422469 |
| 0.860395097 | 0.208443553 | 0.587342554 |
| 0.906191094 | 0.232979163 | 0.725028018 |
| 0.517003219 | 0.273027139 | 0.807904059 |
| 0.92999134  | 0.265559551 | 0.786073685 |
| 1.048864043 | 0.190029773 | 0.676586031 |
| 0.988119867 | 0.204248868 | 0.86701316  |
| 1.007514781 | 0.313717684 | 0.711492281 |
| 0.848884795 | 0.2623085   | 0.931518076 |
| 1.105692009 | 0.233678275 | 0.576018836 |
| 0.7207469   | 0.271335488 | 0.709358341 |
| 0.937799605 | 0.196150111 | 0.688450319 |
| 0.886485548 | 0.278874861 | 0.91376043  |
| 0.877090696 | 0.250117446 | 0.711522381 |
| 1.027404707 | 0.171596838 | 0.484441306 |
| 1.009146231 | 0.252966006 | 1.021265536 |
| 1.032968355 | 0.205706301 | 0.58757764  |
| 0.659612118 | 0.281251403 | 0.909040593 |
| 1.253618424 | 0.279063622 | 0.914499536 |
| 1.100569966 | 0.261018336 | 0.673935504 |
| 1.140158814 | 0.168408972 | 0.902239893 |
| 0.915744919 | 0.244832952 | 0.61189919  |
| 1.282713459 | 0.349812146 | 0.693496107 |
| 0.844988947 | 0.215169105 | 0.770277387 |
| 1.453007807 | 0.194269922 | 0.819363691 |
| 1.030233035 | 0.195784501 | 0.952528062 |
| 1.033319076 | 0.300312584 | 0.73466756  |
| 1.1992773   | 0.284586756 | 0.763065346 |
| 1.370869855 | 0.271592462 | 0.521717289 |
| 0.859631772 | 0.228786736 | 0.597712115 |
| 1.213655018 | 0.244710705 | 0.655490953 |
| 0.905223905 | 0.247390997 | 0.883553473 |
| 1.217491216 | 0.206508123 | 0.564190427 |
| 1.01854902  | 0.225507009 | 0.752688526 |
| 1.067356149 | 0.175035825 | 0.807358362 |
| 1.003227485 | 0.382028101 | 0.553586897 |
| 1.220243414 | 0.32136707  | 0.81457718  |
| 0.94221248  | 0.256541155 | 0.738115863 |
| 1.179558241 | 0.203276254 | 0.845895468 |
| 0.914558389 | 0.324770186 | 1.086102907 |
| 0.801416291 | 0.262865745 | 0.877889669 |
| 1.035015428 | 0.021559603 | 0.699620886 |
| 1.082066112 |             | 0.95032281  |

|             |             |
|-------------|-------------|
| 0.811251855 | 0.865579777 |
| 0.91588688  | 0.710478151 |
| 0.908962873 | 0.649704115 |
| 1.106469678 | 0.665497007 |
| 1.0623013   | 0.665208474 |
| 0.720322484 | 0.765678208 |
| 1.102371226 | 0.944385142 |
| 0.938489301 | 1.134503572 |
| 0.954234744 | 0.970099663 |
| 0.718360421 | 0.913262513 |
| 0.884591853 | 0.76708806  |
| 0.845715923 | 0.733579039 |
| 1.04584826  | 1.058870001 |
| 1.367647725 | 0.888466653 |
| 1.260465301 | 0.644794826 |
| 0.970423538 | 0.557005859 |
| 0.940431194 | 0.635286134 |
| 1.271341496 | 0.724258977 |
| 1.047479283 | 0.709743605 |
| 0.691245498 | 0.640602336 |
| 1.00418843  | 0.814681613 |
| 0.938614505 | 0.545818359 |
| 1.181169974 | 1.108170276 |
| 0.81468298  | 0.680970771 |
| 0.871540217 | 0.166799037 |
| 0.812335588 | 0.728084643 |
| 1.002970642 | 0.828958114 |
| 1.148650626 | 0.844157948 |
| 0.874450623 | 0.729151674 |
| 0.999185644 | 0.699133854 |
| 0.813468719 | 0.941097725 |
| 1.181740588 | 0.560300171 |
| 0.99555755  | 0.853308758 |
| 1.009619097 | 1.3256134   |
| 0.957300714 | 0.643276836 |
| 1.073707017 | 0.770078657 |
| 1.261849032 | 1.024204614 |
| 1.290364147 | 0.611762109 |
| 0.841158881 | 0.942658418 |
| 1.028733268 | 0.584843224 |
| 1.140762264 | 0.855608205 |
| 0.857411928 | 0.791609104 |
| 1.201886392 | 0.654042887 |

|             |             |
|-------------|-------------|
| 1.165615472 | 0.901916123 |
| 1.241342259 | 0.779529256 |
| 0.915266781 | 0.679347864 |
| 0.849956619 | 0.665477204 |
| 1.114956437 | 0.95052602  |
| 1.216537342 | 0.567582545 |
| 0.928300904 | 0.723838532 |
| 0.976284566 | 1.187156385 |
| 0.714017935 | 0.79174469  |
| 0.934505861 | 0.847515427 |
| 1.489978597 | 0.575100553 |
| 1.226166926 | 0.705044466 |
| 0.919625194 | 0.905201792 |
| 0.985690222 | 0.808263937 |
| 0.928174167 | 0.74981108  |
| 0.719991255 | 0.697613998 |
| 1.501428888 | 0.535737798 |
| 0.884130888 | 0.989925113 |
| 0.872464928 | 0.638687676 |
| 0.848408428 | 0.736993796 |
| 1.286273147 | 0.982592107 |
| 1.13653484  | 0.786110295 |
| 0.852679299 | 0.85340669  |
| 0.957008332 | 0.600097351 |
| 0.911628453 | 0.746206219 |
| 0.827495166 | 0.601612626 |
| 0.88529252  | 0.580699314 |
| 0.61019156  | 0.582769312 |
| 0.593464792 | 0.702311735 |
| 0.982018644 | 0.693900816 |
| 1.037992793 | 0.901616417 |
| 0.857766997 | 0.762965931 |
| 1.22967026  | 0.696867458 |
| 0.576150724 | 0.961361146 |
| 0.981642307 | 0.650860326 |
| 0.48235243  | 0.656366108 |
| 0.878128279 | 0.680899792 |
| 0.931646439 | 1.008001141 |
| 1.12595136  | 0.721379022 |
| 1.292806432 | 0.750415279 |
| 0.723779088 | 0.719100064 |
| 0.775797557 | 0.762149955 |
| 1.108767965 | 1.015504806 |

|             |             |
|-------------|-------------|
| 1.012803077 | 0.915406322 |
| 0.957942911 | 0.549760416 |
| 0.685210929 | 0.677003204 |
| 0.848652478 | 0.727196797 |
| 0.907471557 | 0.884392556 |
| 0.867815324 | 0.802641983 |
| 1.159887632 | 0.547924242 |
| 0.898629185 | 0.682052743 |
| 0.763841691 | 0.571488961 |
| 1.107303805 | 0.587132611 |
| 0.927734764 | 0.851984728 |
| 1.051778741 | 0.771962486 |
| 0.925099154 | 0.593955068 |
| 0.921247108 | 0.958044813 |
| 1.1834839   | 0.911204457 |
| 1.189197068 | 0.717626944 |
| 0.825684986 | 0.697838412 |
| 1.084686126 | 0.7714788   |
| 0.52834835  | 0.63753541  |
| 0.909736751 | 0.924306824 |
| 0.87432865  | 0.746601665 |
| 0.865163465 | 0.911464133 |
| 1.335751892 | 0.695071408 |
| 0.832041842 | 0.631609212 |
| 1.170132415 | 0.700001499 |
| 1.213986459 | 0.402684174 |
| 0.82622576  | 0.865863783 |
| 0.727615538 | 0.816932345 |
| 1.504841227 | 0.211152548 |
| 1.030320819 | 0.978631107 |
| 1.194672912 | 0.715198189 |
| 1.327410066 | 0.567875826 |
| 0.658997202 | 1.311602049 |
| 1.033946038 | 0.702311735 |
| 1.217117723 | 0.779067116 |
| 0.715752942 | 0.62214712  |
|             | 0.723529612 |
|             | 0.755402255 |
|             | 0.898959021 |
|             | 0.600363258 |
|             | 0.729472963 |
|             | 0.760650729 |
|             | 0.811992661 |
