# Supplementary material for: The O-GlcNAc transferase OGT is a conserved and essential regulator of the cellular and organismal response to hypertonic stress
Source: PubMed Central journal article supplement (PMC7556452; doi:10.1371/journal.pgen.1008821), 2020-10-02
Supplement: pgen.1008821.s022.pdf [file pgen.1008821.s022.pdf]

|       |             |             |             |             |             |             |
|-------|-------------|-------------|-------------|-------------|-------------|-------------|
| L1    | 1.084619631 | 0.744151643 | 1.035923847 | 0.884991851 | 0.998366126 | 0.753466353 |
| L4    | 0.724464529 | 0.979950034 | 0.867243085 | 0.712995869 | 0.810101675 | 0.844487996 |
| Adult | 0.706375533 | 1.494855896 | 0.922081871 | 1.36830476  | 0.754814735 | 0.6640898   |

|             |             |             |             |             |             |             |
|-------------|-------------|-------------|-------------|-------------|-------------|-------------|
| 0.776144848 | 1.122829872 | 0.632432339 | 1.160196428 | 0.719218583 | 0.78012391  | 0.91093344  |
| 0.734215287 | 1.834433416 | 0.688557485 | 0.778152916 | 1.114609835 | 0.564026521 | 0.868960491 |
| 0.808031823 | 1.06858086  | 0.887123733 | 0.676612335 | 0.699666039 | 1.260602935 | 0.82532668  |

|             |             |             |             |             |             |             |
|-------------|-------------|-------------|-------------|-------------|-------------|-------------|
| 0.846089736 | 0.590807281 | 1.052105283 | 0.59684458  | 0.764851294 | 0.697152591 | 0.746049808 |
| 0.961636323 | 1.063029347 | 0.831962359 | 0.812995584 | 0.929898567 | 0.923065014 | 1.137525743 |
| 1.631274661 | 0.840416674 | 1.048639518 | 2.039495727 | 0.747137837 | 0.786939393 | 0.160930852 |

|             |             |             |             |             |             |             |
|-------------|-------------|-------------|-------------|-------------|-------------|-------------|
| 1.114124977 | 0.736947771 | 0.663067209 | 0.683622562 | 0.874731105 | 0.627103767 | 1.263613675 |
| 0.713373588 | 0.755719966 | 0.866580517 | 1.286371483 | 1.330650958 | 0.54946001  | 0.785498335 |
| 0.86697292  | 0.764768655 | 0.905325451 | 1.030368518 | 1.099694158 | 1.091865602 | 1.306929327 |

|             |             |             |             |             |             |             |
|-------------|-------------|-------------|-------------|-------------|-------------|-------------|
| 1.309152721 | 1.107100778 | 0.774947732 | 1.011879536 | 0.810472745 | 1.384575026 | 0.835790891 |
| 1.042573332 | 0.801685854 | 1.224194371 | 0.966092155 | 1.70377945  | 0.961579773 | 1.319043856 |
| 1.044882494 | 1.021671432 | 0.907097558 | 1.300031567 | 1.154581981 | 0.925867522 | 0.866198121 |

|             |             |             |             |             |             |             |
|-------------|-------------|-------------|-------------|-------------|-------------|-------------|
| 1.205440208 | 0.772014615 | 0.863605608 | 0.942606162 | 1.074031057 | 0.788666303 | 0.872292588 |
| 1.357579525 | 0.819632283 | 1.108459257 | 0.9939672   | 0.680082821 | 0.99182107  | 0.821328659 |
| 1.125983964 | 1.07600156  | 1.022547362 | 1.116073343 | 1.033735832 | 1.370745111 | 1.250635377 |

|             |             |             |             |             |             |             |
|-------------|-------------|-------------|-------------|-------------|-------------|-------------|
| 0.986536686 | 1.250649497 | 0.987070981 | 0.999301178 | 0.868354172 | 0.923937169 | 1.59711321  |
| 0.665961308 | 0.777178    | 0.947750347 | 1.158749534 | 1.343536434 | 0.749138788 | 0.970357931 |
| 1.028069568 | 0.823511712 | 0.939536137 | 0.837658725 | 0.896983934 | 1.497839838 | 1.234127224 |

|             |             |             |             |             |             |             |
|-------------|-------------|-------------|-------------|-------------|-------------|-------------|
| 1.506391221 | 0.742338408 | 0.639146058 | 0.602585365 | 0.844627178 | 1.023790519 | 1.058764729 |
| 1.533927208 | 0.927818012 | 0.68233558  | 0.960629111 | 0.592845394 | 0.646106529 | 0.490844428 |
| 0.852429176 | 1.027162997 | 0.732305962 | 0.843391144 | 1.063393574 | 1.286976948 | 1.10592374  |



|             |             |             |             |             |             |             |
|-------------|-------------|-------------|-------------|-------------|-------------|-------------|
| 0.796778387 | 1.013806268 | 0.704940506 | 0.773699452 | 0.60638974  | 0.810326713 | 0.807057999 |
| 1.547026745 | 0.855963    | 0.674093498 | 0.968246927 | 1.272169905 | 0.760931828 | 1.113711255 |
| 0.897154343 | 1.048173934 | 0.964691054 | 1.217520228 | 0.995246879 | 1.339737264 | 0.708557201 |

|             |             |             |             |             |             |             |
|-------------|-------------|-------------|-------------|-------------|-------------|-------------|
| 0.609800039 | 0.888067555 | 0.761258577 | 0.745904521 | 1.048853131 | 0.674873126 | 0.813066719 |
| 0.779032782 | 1.08426203  | 0.756950208 | 0.738684244 | 0.932594424 | 0.808088166 | 1.035102625 |
| 0.81817979  | 1.042238567 | 0.734897617 | 0.674851141 | 1.020600441 | 0.758977967 | 1.300264321 |

|             |             |             |             |             |             |             |
|-------------|-------------|-------------|-------------|-------------|-------------|-------------|
| 0.68461898  | 1.141683619 | 0.776305287 | 0.611140259 | 0.985142616 | 0.834518322 | 1.668412906 |
| 0.817432912 | 1.127979524 | 0.733832604 | 0.788896072 | 0.559992292 | 0.815128809 | 1.164340409 |
| 0.644309278 | 0.995034809 | 0.683506676 | 0.760696901 | 0.919521573 | 0.864832246 | 1.111951586 |

|             |             |             |             |             |             |             |
|-------------|-------------|-------------|-------------|-------------|-------------|-------------|
| 1.783163793 | 0.664351951 | 1.26994177  | 1.024740232 | 0.793496626 | 0.748325647 | 1.980547135 |
| 1.239567341 | 0.911065887 | 1.158518707 | 0.872307533 | 1.027432493 | 0.710254384 | 0.898605576 |
| 1.007542986 | 0.956062333 | 0.861046561 | 1.158660714 | 1.088369394 | 0.783473091 | 0.993328687 |

|             |             |             |             |             |             |             |
|-------------|-------------|-------------|-------------|-------------|-------------|-------------|
| 0.644073928 | 1.040772826 | 1.091055839 | 0.754768508 | 0.605336458 | 1.328636921 | 0.93517952  |
| 1.03785542  | 0.518442107 | 0.807716392 | 0.917691101 | 0.707620342 | 0.608334148 | 0.935541089 |
| 0.751870967 | 0.933446    | 0.991082667 | 0.638460262 | 0.880007767 | 0.999181634 | 0.771028873 |

|             |             |             |             |             |             |             |
|-------------|-------------|-------------|-------------|-------------|-------------|-------------|
| 1.156639527 | 1.036674957 | 1.076974442 | 0.969032917 | 1.080114557 | 1.222280518 | 1.011995697 |
| 1.081502612 | 1.163116004 | 0.675127452 | 1.196855485 | 0.862153457 | 1.874510556 | 0.906714311 |
| 0.671512562 | 0.755562224 | 1.160522534 | 0.945003482 | 0.698810353 | 0.939536137 | 1.035131205 |

ev RNAi

|             |             |             |             |             |             |             |
|-------------|-------------|-------------|-------------|-------------|-------------|-------------|
| 1.218256549 | 1.12696733  | 0.747914672 | 0.710689535 | 0.987541778 | 0.927092477 | 0.60842408  |
| 0.687705169 | 0.857665671 | 1.507913238 | 1.146904485 | 0.910063357 | 0.86837822  | 0.608594483 |
| 1.470470372 | 1.033597558 | 1.276240298 | 0.88238874  | 0.792293794 | 1.443198288 | 1.113105062 |

|             |             |             |             |             |             |             |
|-------------|-------------|-------------|-------------|-------------|-------------|-------------|
| 0.484232648 | 1.012947417 | 0.603854371 | 0.893829533 | 0.929768941 | 0.639536675 | 1.007353515 |
| 0.940894539 | 0.909355343 | 0.828739308 | 1.097482261 | 0.919459292 | 0.724266816 | 1.422097038 |
| 0.689924579 | 0.966539627 | 0.810194505 | 0.742070042 | 1.030472809 | 0.781305929 | 1.082185477 |



|             |             |             |             |             |             |             |
|-------------|-------------|-------------|-------------|-------------|-------------|-------------|
| 0.784093532 | 1.260005225 | 0.770900965 | 1.571343181 | 0.657541649 | 0.743046649 | 0.237665656 |
| 0.755555679 | 0.977766466 | 0.641818643 | 1.009630203 | 0.946590877 | 0.660201918 | 1.053450847 |
| 0.905706    | 1.34744297  | 0.814000757 | 0.537296283 | 1.098414336 | 1.165655087 | 0.802925995 |

|             |             |             |             |             |             |             |
|-------------|-------------|-------------|-------------|-------------|-------------|-------------|
| 0.673069138 | 0.841732532 | 1.082801059 | 0.966959698 | 1.273364617 | 0.81829188  | 1.415431019 |
| 0.982897968 | 1.084162434 | 1.318469928 | 1.42903914  | 0.890143198 | 0.798477806 | 1.276098047 |
| 0.987627765 | 1.190888308 | 1.018807079 | 0.793034852 | 0.920166852 | 0.989426722 | 0.660587841 |

|             |             |             |             |             |             |             |
|-------------|-------------|-------------|-------------|-------------|-------------|-------------|
| 0.876233522 | 1.248909723 | 0.578238091 | 3.762481656 | 0.887285116 | 0.974495393 | 0.797329943 |
| 1.01727411  | 0.88268092  | 0.93680758  | 1.602632955 | 1.042573332 | 0.884714747 | 1.212377943 |
| 0.864421102 | 0.904290004 | 0.819650091 | 1.017050311 | 0.638897478 | 0.673369564 | 1.065018924 |

|             |             |             |             |             |             |             |
|-------------|-------------|-------------|-------------|-------------|-------------|-------------|
| 1.408623025 | 1.430654048 | 0.710643843 | 1.116763529 | 3.229234948 | 2.424189693 | 3.612517974 |
| 0.683539493 | 0.841368228 | 0.867739706 | 0.824935439 | 1.14980804  | 0.678560957 | 0.768786608 |
| 1.260555343 | 0.68591339  | 0.828066944 | 0.932705276 | 0.811169681 | 0.742070042 | 1.104374827 |

0.679944129 0.887285116 0.722937357 2.112583611 0.926551616  
1.215556352 0.815520415 2.00730149 1.068654573 1.088833372 1.381719559 1.629065521  
0.838968444 0.931331942 4.077479597 0.775198169 0.541676934 1.040623803 0.765746985

0.724464529 0.921729561 1.126218531 1.049529143 0.783801363 0.78928865 0.729820813  
1.490106476 0.862102088 0.974890121 0.585052323 0.906748599 1.188637192 1.021134219

0.47219689 0.905909365 0.906863959 0.932023332 0.562492743 0.914073338 0.829226641  
0.833401739 1.082703074 0.819599748 1.019604237 1.682707791 1.03411051 0.89048405

1.10335115 2.42737253 3.071268499 0.760931828 1.059797815 0.768626644 1.525220707  
0.716306241 1.011070432 1.038898058 0.758871628 1.604134388 0.755562224 0.751964309



0.959658907 1.082374892 0.706144736 1.207648025 0.840343027 0.871066697 0.878594434  
1.184898831 0.727671668 1.61824005 1.080684527 1.143765441 0.760675879 3.646744205

1.076870722 0.865259586 0.533373542 0.750681833 0.773778729 0.988895636 0.667507813  
0.781508729

0.914823362 0.655232424 0.956918744 1.288122874 4.28024153 0.605378507 2.809867595

0.921701875 1.332024963 1.171133814 1.024870106 1.349680709 1.114965373
