# Supplementary material for: The O-GlcNAc transferase OGT is a conserved and essential regulator of the cellular and organismal response to hypertonic stress
Source: PubMed Central journal article supplement (PMC7556452; doi:10.1371/journal.pgen.1008821), 2020-10-02
Supplement: pgen.1008821.s023.pdf [file pgen.1008821.s023.pdf]

*gpdh-1* mRNA

|             | 50mM NaCl   |             |             |             |             | 250mM       |
|-------------|-------------|-------------|-------------|-------------|-------------|-------------|
| WT          | 0.896577376 | 1.51834538  | 0.656333056 | 1.119224928 | 12.66258458 | 19.73247478 |
| ogt-1(dr20) | 0.91806402  | 1.170128253 | 0.930879716 |             | 61.67725558 | 89.67703455 |

*hmit-1.1* mRNA

|             | 50mM NaCl   |             |             |             |             | 250mM       |
|-------------|-------------|-------------|-------------|-------------|-------------|-------------|
| WT          | 1.464297133 | 1.324922831 | 0.501286864 | 1.028238545 | 101.7022885 | 163.7300138 |
| ogt-1(dr20) | 0.376218955 | 1.790601679 | 1.484432107 |             | 115.1771813 | 234.9149053 |

*nlp-29* mRNA

|             | 50mM NaCl   |             |             |             |             | 250mM       |
|-------------|-------------|-------------|-------------|-------------|-------------|-------------|
| WT          | 0.868009858 | 1.114773027 | 1.264952607 | 0.816986041 | 2.483113144 | 3.021119673 |
| ogt-1(dr20) | 0.624997456 | 1.572059209 | 1.017777513 |             | 1.968534807 | 4.600388036 |

∧ NaCl

16.13923174 22.66666132

48.39099393

∧ NaCl

104.6243609 189.0610462

159.3451293

∧ NaCl

4.659957078 3.059544042

2.804004936
