# Supplementary material for: The O-GlcNAc transferase OGT is a conserved and essential regulator of the cellular and organismal response to hypertonic stress
Source: PubMed Central journal article supplement (PMC7556452; doi:10.1371/journal.pgen.1008821), 2020-10-02
Supplement: pgen.1008821.s024.pdf [file pgen.1008821.s024.pdf]

*gfp* mRNA

|             | 50mM NaCl   |             |             | 250mM      |             |             |
|-------------|-------------|-------------|-------------|------------|-------------|-------------|
| WT          | 1.115352704 | 1.901977263 | 0.701006633 | 0.67245051 | 12.18893355 | 16.88300726 |
| ogt-1(dr20) | 1.021012126 | 1.613283518 | 0.607097442 |            | 32.89964245 | 50.91433496 |

1 NaCl

12.27371429 10.39271004

18.25221945
