# Supplementary material for: The O-GlcNAc transferase OGT is a conserved and essential regulator of the cellular and organismal response to hypertonic stress
Source: PubMed Central journal article supplement (PMC7556452; doi:10.1371/journal.pgen.1008821), 2020-10-02
Supplement: pgen.1008821.s025.pdf [file pgen.1008821.s025.pdf]

| WT          | ogt-1(dr34) |
|-------------|-------------|
| 1.104378531 | 0.451751452 |
| 1.601967637 | 0.263619778 |
| 1.008693525 | 0.278435501 |
| 0.803084252 | 0.288655092 |
| 0.766395465 | 0.273882349 |
| 0.633208567 | 0.44796844  |
| 0.901681094 | 0.620722541 |
| 1.24830465  | 0.274207595 |
| 0.833225462 | 0.303904795 |
| 1.334407124 | 0.51565295  |
| 0.772873962 | 0.503633771 |
| 0.817869787 | 0.280869928 |
| 1.534771792 | 0.337908129 |
| 0.848867993 | 0.309749118 |
| 0.679688557 | 0.444073744 |
| 0.793871895 | 0.375999193 |
| 0.977515725 | 0.487452326 |
| 1.036596346 | 0.631901609 |
| 1.005676627 | 0.408904783 |
| 0.836846913 | 0.510093555 |
| 0.76525686  | 0.497811082 |
| 0.637510256 | 0.349358681 |
| 0.5455994   | 0.42530622  |
| 0.763418911 | 0.555184927 |
| 0.780932673 | 0.422385161 |
| 0.648944053 | 0.318431811 |
| 0.723323488 | 0.267854004 |
| 3.111421179 | 0.383093518 |
| 0.848194971 | 0.338155862 |
| 1.981546527 | 0.346715572 |
| 0.846053573 | 0.378968184 |
| 0.873884283 | 0.420518952 |
| 0.668837216 | 0.2433238   |
| 0.909729936 | 0.503613076 |
| 0.873018104 | 0.316788871 |
| 1.025505084 | 0.390471615 |
| 1.032507999 | 0.521401267 |
| 0.876576602 | 0.464373003 |
| 0.702385097 | 0.522176008 |
| 0.806817209 | 0.407950007 |
| 0.878116076 | 0.539295339 |
| 1.10056904  | 0.359530226 |

|             |             |
|-------------|-------------|
| 0.715784444 | 0.515549101 |
| 0.978446594 | 0.458949846 |
| 0.848775309 | 0.368798984 |
| 0.905740095 | 0.45963587  |
| 0.770085333 | 0.396940271 |
| 1.169388839 | 0.381550342 |
| 0.633181274 | 0.472790641 |
| 0.754012342 | 0.373820452 |
| 0.646373043 | 0.549100709 |
| 1.092542047 | 0.325454827 |
| 0.749335121 | 0.385627979 |
| 0.926658699 | 0.502993016 |
| 0.716004753 | 0.32694546  |
| 0.836293552 | 0.545742295 |
| 0.710276715 | 0.357000461 |
| 1.092868228 | 0.451899652 |
| 3.483861431 | 0.461142119 |
| 2.328471524 | 0.248036146 |
| 0.754044388 | 0.395903332 |
| 0.667039267 | 0.413116521 |
| 0.778337392 | 0.44310342  |
| 0.807379832 | 0.412264111 |
| 0.92032629  | 0.484759855 |
| 0.85283043  | 0.387807884 |
| 1.247722458 | 0.317807484 |
| 2.079537431 | 0.451679615 |
| 0.8857903   | 0.372572371 |
| 0.657943277 | 0.283864664 |
| 0.894193179 | 0.319864491 |
| 0.817716131 | 0.400478637 |
| 0.723590533 | 0.384549356 |
| 0.724621289 | 0.376219083 |
| 0.613561939 | 0.548202017 |
| 1.329313967 | 0.36065728  |
| 0.874393187 | 0.306558688 |
| 0.815312567 | 0.387706576 |
| 0.638983538 | 0.49590376  |
| 0.766520123 | 0.343753327 |
| 0.790288189 | 0.334707187 |
| 1.499542662 | 0.389625916 |
| 0.744892553 | 0.326198441 |
| 0.524404357 | 0.338048689 |
| 1.999192723 |             |

0.872549052  
0.776927238  
1.057816317  
1.01745208  
1.132806685  
0.805488696  
0.818700887  
0.704323558  
1.055011085  
2.086013707  
0.844132805  
0.77125803  
1.609317937  
0.674091664  
0.756371369  
1.084457617  
1.497176562  
2.227356934  
0.970923723  
1.528523959  
0.685158841  
0.526242056  
0.858223754  
0.865744639  
0.697578414  
0.722491929  
1.004281442  
0.792197162  
0.696595483  
2.497702723  
0.824610795  
1.022861434  
0.538330312  
0.849963532  
1.425206359  
0.510573266  
0.721184738  
1.046675195  
0.727566904  
1.005102202  
0.941082953  
1.814553639  
1.155925189

0.713929119

1.69799358

0.756047319

1.516834746

0.659592257

0.913064139

0.816334189
