# Supplementary material for: The O-GlcNAc transferase OGT is a conserved and essential regulator of the cellular and organismal response to hypertonic stress
Source: PubMed Central journal article supplement (PMC7556452; doi:10.1371/journal.pgen.1008821), 2020-10-02
Supplement: pgen.1008821.s026.pdf [file pgen.1008821.s026.pdf]

*gpdh-1* mRNA

|             | 50mM NaCl   |             |             | 250mM       |             |
|-------------|-------------|-------------|-------------|-------------|-------------|
| WT          | 0.92873141  | 0.872564288 | 1.23399225  | 78.97550398 | 77.88822487 |
| ogt-1(dr34) | 1.101905116 | 0.952637998 | 0.952637998 | 73.00887782 | 100.4267645 |

1 NaCl

81.1958076

96.33579183
