# Supplementary material for: The O-GlcNAc transferase OGT is a conserved and essential regulator of the cellular and organismal response to hypertonic stress
Source: PubMed Central journal article supplement (PMC7556452; doi:10.1371/journal.pgen.1008821), 2020-10-02
Supplement: pgen.1008821.s027.pdf [file pgen.1008821.s027.pdf]

| <i>gpdh-1(dr81)</i> |            | <i>gpdh-1(dr81);ogt-1(dr83)</i> |             |
|---------------------|------------|---------------------------------|-------------|
| 50mM                | 250mM      | 50mM                            | 250mM       |
| 0.007189001         | 1.34254366 | 0.005042003                     | 0.667210122 |
| 0.006721055         | 0.82259621 | 0.005901857                     | 0.431842437 |
| 0.002096393         | 0.83486013 | 0.003520223                     | 0.421250871 |
