# Supplementary material for: The O-GlcNAc transferase OGT is a conserved and essential regulator of the cellular and organismal response to hypertonic stress
Source: PubMed Central journal article supplement (PMC7556452; doi:10.1371/journal.pgen.1008821), 2020-10-02
Supplement: pgen.1008821.s028.pdf [file pgen.1008821.s028.pdf]

|                |   |   | Unadapted |   |   |
|----------------|---|---|-----------|---|---|
| WT(drls4)      | 0 | 0 | 0         | 0 | 0 |
| ogt-1(dr15)    | 0 | 0 | 0         | 0 | 0 |
| ogt-1(dr20)    | 0 | 0 | 0         | 0 | 0 |
| ogt-1(ok430)   | 0 | 0 | 0         | 0 | 0 |
| ogt-1(ok1474)  | 0 | 0 | 0         | 0 | 0 |
| WT(N2)         | 0 | 0 | 0         | 0 | 0 |
| gpdh-1(ok1558) | 0 | 0 | 0         | 0 | 0 |

Adapted

|             |             |    |    |    |
|-------------|-------------|----|----|----|
| 73.68421053 | 55          | 60 | 80 | 10 |
| 5           | 10          | 0  | 10 | 0  |
| 5           | 5.263157895 | 0  | 0  | 0  |
| 0           | 0           | 0  | 0  | 0  |
| 5           | 0           | 0  | 0  | 0  |
| 60          | 70          | 60 | 55 | 40 |
| 10          | 45          | 10 | 25 | 20 |
