# Supplementary material for: The O-GlcNAc transferase OGT is a conserved and essential regulator of the cellular and organismal response to hypertonic stress
Source: PubMed Central journal article supplement (PMC7556452; doi:10.1371/journal.pgen.1008821), 2020-10-02
Supplement: pgen.1008821.s029.pdf [file pgen.1008821.s029.pdf]

osm-8(dr9) -8(dr9);ogt-1(dr20)

|             |             |
|-------------|-------------|
| 1.781579314 | 0.532484438 |
| 0.835788784 | 0.29353005  |
| 1.099582967 | 0.235527407 |
| 1.006879664 | 0.263205235 |
| 1.454063909 | 0.355160375 |
| 0.955741299 | 0.216351198 |
| 0.502434962 | 0.332733222 |
| 1.323143148 | 0.322717841 |
| 1.994839204 | 0.331210416 |
| 0.862591613 | 0.372918394 |
| 0.69429789  | 0.335626555 |
| 0.888423233 | 0.295445911 |
| 0.8989997   | 0.440910681 |
| 0.535574289 | 0.209766597 |
| 0.804105287 | 0.278261812 |
| 0.614316462 | 0.29514898  |
| 0.517942214 | 0.263525875 |
| 0.686846379 | 1.194504231 |
| 0.915647843 | 0.375508105 |
| 1.136235732 | 0.34501085  |
| 0.937593122 | 0.370176347 |
| 0.788865834 | 0.234376086 |
| 1.198666267 | 0.328550091 |
| 0.971550553 | 0.215349738 |
| 0.677707466 | 0.239207523 |
| 1.273582909 | 0.349610995 |
| 0.747444195 | 0.553230585 |
| 0.977321644 | 0.415753615 |
| 0.985903004 | 0.223155954 |
| 1.165369982 | 0.786624738 |
| 0.715482965 | 0.288669628 |
| 1.242039059 | 0.215809256 |
| 1.064487207 | 0.291849178 |
| 0.885681186 | 0.367091544 |
| 0.65652141  | 0.770029279 |
| 1.92985269  | 0.398097191 |
| 0.738950511 | 0.5940293   |
| 2.200829867 | 0.384305215 |
| 1.369904305 | 0.450505443 |
| 1.398443978 | 0.466147993 |
| 0.815758987 | 0.425017287 |
| 1.242039059 | 0.192642793 |

|             |             |
|-------------|-------------|
| 0.973144005 | 0.200158966 |
| 0.76536461  | 0.414922939 |
| 1.221425753 | 0.675914589 |
| 1.040019261 | 0.585834639 |
| 2.20125441  | 0.444959448 |
| 1.02386077  | 0.346721647 |
| 1.25859958  | 0.572090718 |
| 0.942429637 | 0.235452302 |
| 0.845833051 | 0.508525083 |
| 0.922973025 | 0.240357559 |
| 0.561003689 | 0.252496829 |
| 0.882195967 | 0.408636227 |
| 0.705249765 | 0.37947726  |
| 0.60599239  | 0.279688796 |
| 1.214438191 | 0.161358921 |
| 0.760918047 | 0.394192262 |
| 0.603873536 | 0.559377591 |
| 0.729622945 | 0.466147993 |
| 0.722725249 | 0.232082192 |
| 0.86374481  | 0.464483178 |
| 0.997251033 | 0.240592512 |
| 0.786624738 | 0.265367381 |
| 0.859044158 | 0.364811473 |
| 1.275051862 | 0.30590962  |
| 0.68878584  | 0.514521841 |
| 0.83518182  | 0.670087739 |
| 1.885244097 | 0.404549865 |
| 0.557889885 | 0.82724855  |
| 1.314537339 | 0.362097101 |
| 0.788484371 | 0.520588634 |
| 0.471974843 | 0.351631867 |
| 0.750743609 | 0.308131724 |
| 0.846426618 | 0.922973025 |
| 0.939754353 | 0.38290728  |
| 0.744333085 | 0.30590962  |
| 1.482046607 | 0.200925859 |
| 0.951267125 | 0.354151397 |
| 1.514980976 | 0.264821617 |
| 0.974971506 | 0.450738142 |
| 0.770029279 | 0.572090718 |
| 0.786624738 | 0.360536338 |
| 0.902484195 | 0.243022277 |
| 0.865703415 | 0.556523624 |

|             |             |
|-------------|-------------|
| 0.864686734 | 0.355744521 |
| 1.56436106  | 0.30400956  |
| 0.599333133 | 0.386412152 |
| 3.43254431  | 0.529713628 |
| 1.685010367 | 0.8989997   |
| 0.624836671 | 0.471385611 |
| 0.44949985  | 0.361666546 |
| 1.176739445 | 0.494954891 |
| 1.34344899  | 0.299666567 |
| 1.000425307 | 0.401192945 |
| 1.610707796 | 0.437974213 |
| 0.772824304 | 0.416203565 |
| 1.830690298 | 0.402582357 |
| 0.578666474 | 0.43077069  |
| 0.632173305 | 0.328330325 |
| 1.002218184 | 0.343583219 |
| 1.357313273 | 0.204650338 |
| 1.066916311 | 0.462720434 |
| 0.672836254 | 0.44781633  |
| 1.012666329 | 0.524416492 |
| 0.545967854 | 1.207747072 |
| 0.699221989 | 0.248875623 |
| 0.889918895 | 0.287914937 |
| 1.265832911 | 0.360205267 |
| 0.620737888 |             |
| 0.908988586 |             |
| 0.495811956 |             |
| 0.762787624 |             |
| 0.839066387 |             |
| 1.304645906 |             |
| 1.445688707 |             |
| 1.225602587 |             |
| 0.649277561 |             |
| 0.610230099 |             |
| 0.867304198 |             |
| 1.198666267 |             |
| 1.007702278 |             |
| 0.754556103 |             |
| 1.20537522  |             |
| 0.553550741 |             |
| 1.198666267 |             |
| 1.28656846  |             |
| 0.653371367 |             |

1.191855663  
0.889918895  
0.874027486  
1.509296245  
1.000050054  
0.524416492  
0.746285007  
0.669467862  
0.829309801  
0.61531535  
1.075726137  
0.684952152  
0.801547158  
1.426412858  
0.653817964  
0.943949685  
0.84362653  
1.210191904  
1.915260231
