# Supplementary material for: The O-GlcNAc transferase OGT is a conserved and essential regulator of the cellular and organismal response to hypertonic stress
Source: PubMed Central journal article supplement (PMC7556452; doi:10.1371/journal.pgen.1008821), 2020-10-02
Supplement: pgen.1008821.s030.pdf [file pgen.1008821.s030.pdf]

osm-8(dr9)

|            |    |     |     |     |     |    |
|------------|----|-----|-----|-----|-----|----|
| 500mM NaCl | 80 | 100 | 100 | 100 | 100 | 20 |
| 700mM NaCl | 30 | 100 | 100 | 100 | 90  | 0  |

ogt-1(dr20);osm-8(dr9)

|    |    |    |    |
|----|----|----|----|
| 40 | 30 | 20 | 30 |
| 0  | 20 | 10 | 10 |
