# Supplementary material for: The O-GlcNAc transferase OGT is a conserved and essential regulator of the cellular and organismal response to hypertonic stress
Source: PubMed Central journal article supplement (PMC7556452; doi:10.1371/journal.pgen.1008821), 2020-10-02
Supplement: pgen.1008821.s031.pdf [file pgen.1008821.s031.pdf]

| WT         | <i>ogt-1(dr20)</i> | <i>ogt-1p</i> | <i>dpy-7p</i> | <i>nhx-2p</i> | <i>myo-3p</i> | <i>rab-3p</i> |
|------------|--------------------|---------------|---------------|---------------|---------------|---------------|
| 1.35735729 | -0.0406955         | 0.9090692     | 0.87080048    | 0.35701294    | 0.13292042    | 0.0371497     |
| 0.6031361  | -0.0614692         | 0.8199028     | 1.1995701     | 0.41719123    | 0.05301068    | -0.0436303    |
| 1.47184937 | -0.0396087         | 1.33743868    | 1.15276879    | 0.30290725    | 0.09419211    | 0.09294081    |
| 1.13397262 | -0.151664          | 0.96068288    | 0.77446036    | 0.22222978    | 0.16447455    | 0.24442125    |
| 0.9338797  | -0.1133232         | 0.85749219    | 0.41137734    | 0.2016192     | 0.17326728    | 0.03482622    |
| 0.69307164 | 0.01794558         | 1.08825022    | 1.19004483    | -0.0829995    | 0.16264072    | 0.05753739    |
| 1.48705646 | 0.11579361         | 0.78076284    | 1.11547907    | 0.36620061    | 0.13939278    | 0.01408001    |
| 0.85769565 | -0.0080054         | 0.84938914    | 0.70144382    | 0.19164704    | 0.30981295    | 0.09282946    |
| 1.10296627 | -0.0494189         | 0.6849885     | 0.38634908    | -0.1851008    | 0.194387      | 0.06024826    |
| 1.27901823 | -0.0072574         | 0.89991503    | 0.6742284     | 0.60318278    | 0.39466381    | -0.0322714    |
| 0.96120671 | 0.04393094         | 0.81400602    | 0.5017126     | 0.4357072     | 0.37688271    | 0.16072057    |
| 1.26702552 | 0.0314073          | 1.21909095    | 0.91359389    | 0.24756613    | 0.09855162    | -0.0300609    |
| 1.18631256 | 0.06730583         | 0.8507362     | 0.97511727    | 0.48356627    | 0.02081834    | 0.05728876    |
| 1.34850207 | 0.11393066         | 0.38184948    | 0.50229944    | 0.32589376    | 0.0500063     | 0.05820316    |
| 1.39516061 | 0.10924809         | 0.6941588     | 0.6243594     | 0.30400095    | 0.20807118    | -0.1294196    |
| 1.23743387 | 0.02906211         | 0.49076181    | 1.19335618    | 0.30869082    | 0.3434942     | 0.00817296    |
| 0.83474276 | -0.0345217         | 0.74182953    | 0.84411024    | 0.24921334    | 0.02472402    | 0.09651962    |
| 1.40000319 | -0.0465453         | 0.68671285    | 0.98049443    | 0.40153816    | 0.29574238    | -0.00008802   |
| 0.73936494 | 0.01658396         | 0.77000358    | 0.68610559    | 0.19200968    | 0.2826083     | 0.00952659    |
| 1.19431768 | -0.0065536         | 0.59745164    | 1.3453999     | 0.08169258    | 0.45198347    | 0.07906985    |
| 1.19967356 | 0.02746175         | 1.19089986    | 0.76666088    | 0.30101322    | 0.02000816    | 0.03669303    |
| 1.75512526 | -0.0015907         | 0.69687779    | 1.64452949    | 0.15840633    | 0.10792138    | -0.0366145    |
| 1.59826385 | 0.01806105         | 1.30258637    | 0.43071087    | 0.39666081    | 0.30240261    | 0.04687802    |
| 1.3752574  | 0.06069643         | 0.68075626    | 1.31685723    | 0.40004212    | 0.71576712    | 0.01643897    |
| 0.8470125  | -0.0322753         | 1.27569069    | 0.69345105    | 0.14232283    | -0.0169418    | 0.14731046    |
| 1.31019545 | 0.04786423         | 0.49153882    | 0.77376169    | 0.27831677    | 0.14170517    | -0.0650374    |
| 0.89478031 | -0.1357778         | 0.9870805     | 1.46597465    | 0.40981623    | 0.22744526    | 0.14379081    |
| 0.88790101 | -0.054691          | 1.12737875    | 0.85241654    | 0.19430044    | 0.00586909    | 0.06219903    |
| 0.91362816 | -0.0447254         | 0.89319059    | 0.65972332    | 0.16464716    | 0.20729459    | -0.0330389    |
| 0.47843291 | 0.24604927         | 0.67932358    | 0.90023152    | 0.11915429    | 0.17588877    | 0.0359956     |
| 1.31138409 | 0.08944951         | 1.05397857    | 1.09358813    | -0.0805801    | 0.16022128    | 0.04296152    |
| 0.67818298 | 0.08453765         | 0.85717139    | 1.29342718    | 0.1885661     | 0.03553331    | 0.02236061    |
| 0.38958206 | 0.04024536         | 0.59970774    | 0.40792921    | 0.10334382    | 0.22070726    | -0.0212973    |
| 0.80787703 | -0.0125801         | 0.73366336    | 0.62219493    | 0.15933797    | 0.04649041    | -0.0247985    |
| 1.01044503 | -0.0434982         | 0.688016      | 1.56192847    | 0.34221202    | 0.03015128    | -0.0995832    |
| 0.87162841 | 0.02504586         | 0.94520427    | 0.85341827    | 0.37323464    | 0.49132487    | -0.0172752    |
| 0.80419158 | -0.0361074         | 1.03237325    | 0.2546346     | 0.37034999    | 0.19928457    | 0.05332856    |
| 1.10063573 | 0.08453765         | 0.87297079    | 1.06381422    | 0.47291349    | 0.28018849    | 0.01202809    |
| 0.62846943 | 0.09552857         | 0.68247858    | 1.03532925    | 0.46208166    | 0.23038842    | 0.13831866    |
| 0.56666837 | 0.19946692         | 0.91749664    | 0.95990469    | 0.51504118    | -0.0867104    | 0.14903336    |
| 0.67483166 | -0.0748575         | 0.43495346    | 0.43195485    | 0.38618757    | 0.04063078    | 0.00100373    |
| 1.06296005 | 0.03663649         | 0.80152245    | 0.8834704     | 0.49069618    | -0.0751719    | 0.43666509    |

|            |            |            |            |            |            |            |
|------------|------------|------------|------------|------------|------------|------------|
| 1.2598534  | 0.15932188 | 1.27840287 | 1.29214399 | 0.27731973 | 0.23266153 | 0.00375013 |
| 1.29278451 | -0.0761505 | 0.83293045 | 0.64287431 | 0.41202672 | 0.05466033 | 0.02628541 |
| 0.84208881 | 0.06341587 | 0.87197357 | 0.94486227 | 0.28844804 | 0.17462271 | 0.00458441 |
| 1.06132568 | -0.0767599 | 0.82933218 | 0.6765236  | -0.1952601 | 0.30958462 | 0.0874904  |
| 1.14149662 | -0.1010279 | 1.00109473 | 0.69221537 | 0.55892457 | 0.23334914 | 0.20081002 |
| 0.82067324 | -0.0935797 | 1.0658166  | -0.0211619 | -0.227206  | 0.31698361 | 0.13359969 |
| 1.46439633 | 0.02447109 | 0.54993359 | 1.407132   | 0.35280944 | 0.05309836 | 0.16351935 |
| 1.86678519 | -0.0361074 | 0.65299652 | 0.48586792 | 0.36628571 | 0.13740057 | 0.10971425 |
| 1.10860351 | 0.02069561 | 0.62908133 | 1.69203404 | 0.10681906 | 0.32766471 | 0.06127765 |
| 0.70307893 | -0.1046594 | 0.91371332 | 1.29268568 | 0.43779038 | -0.1204309 | -0.1442765 |
| 0.80708694 | -0.0385589 | 0.61736237 | 1.03747283 | 0.15770454 | -0.2352277 | 0.0330127  |
| 0.61094038 | 0.00473729 | 1.02909972 | 0.93772285 | 0.13507273 | 0.39898173 | 0.10847959 |
| 0.93327549 | -0.0200843 | 0.75592017 | 1.22569267 | 0.19035941 | 0.14379149 | -0.0251342 |
| 0.98771449 | -0.0343939 | 0.84461275 | 0.92201943 | 0.18461961 | -0.0064238 | -0.0477689 |
| 0.81160285 | -0.1083219 | 0.74907192 | 1.02745924 | 0.45299202 | 0.05739889 | 0.16398433 |
| 1.13617977 | 0.0097312  | 0.57750003 | 0.43833387 | 0.18042816 | 0.37437771 | 0.17566889 |
| 0.85943681 | 0.05937322 | 0.97818552 | 1.08736791 | 0.58698587 | 0.42112763 | 0.14681373 |
| 0.80043558 | -0.068326  | 1.00305986 | 1.25950438 | 0.09578378 | -0.0546594 | 0.10678671 |
| 0.85541461 | 0.17821766 | 0.82097856 | 0.80577959 | 0.4238517  | 0.09508048 | 0.13243196 |
| 1.16076746 | -0.1274391 | 0.70343073 | 0.81932645 | 0.22744209 | 0.23438477 | 0.14731046 |
| 1.23864675 | 0.05252217 | 0.60452051 | 0.49117338 | 0.56230692 | 0.07257833 | -0.0010346 |
| 0.86614337 | -0.0168575 | 0.44227815 | 0.43101476 | 0.43423514 | 0.08730754 | -0.0136304 |
| 0.83328877 | 0.10220214 | 0.84473496 | 0.60536323 | 0.33606618 | 0.03135985 | -0.0105225 |
| 2.06467294 | 0.15348948 | 0.71556385 | 1.54799568 | 0.35081619 | 0.49451132 | 0.33884978 |
| 0.81825104 | -0.0906002 | 0.91231068 | 1.03582825 | 0.08999633 | -0.0074856 | 0.12006138 |
| 1.21295192 | 0.1887091  | 0.84948964 | 0.69761881 | 0.14093151 | -0.0064238 | 0.00528606 |
| 1.31472357 | -0.0244578 | 0.61963529 | 0.66151298 | 0.15401653 | 0.18854285 | 0.01786725 |
| 0.62998334 | -0.0182509 | 0.76079716 | 1.26968451 | 0.47951128 | 0.15014775 | 0.07747966 |
| 1.26968351 | 0.03174524 | 1.27340718 | 0.86201713 | 0.2939233  | 0.10447823 | -0.0559684 |
| 1.21985944 | -0.037636  | 0.44152625 | 0.63456416 | 0.3490385  | 0.06965233 | 0.04283044 |
| 0.40182001 | 0.04283631 | 1.21850404 | 1.44600236 | 0.1252907  | 0.20120995 | 0.00142649 |
| 1.36833138 | 0.02808904 | 0.5202262  | 0.57157808 | 0.4446552  | 0.07322413 | 0.12971871 |
| 1.5177815  | 0.00156005 | 0.62772091 | 0.58464434 | 0.25803388 | 0.52614628 | 0.39778419 |
| 0.72714031 | 0.00241385 | 0.48978297 | 0.63950116 | -0.0673899 | -0.0002837 | 0.18444356 |
| 1.18866719 | 0.00216954 | -0.1012431 | 0.75536772 | 0.58038684 | 0.06947345 | 0.00721302 |
| 0.84163338 | -0.1251787 | 0.78771562 | 1.30682048 | 0.32633663 | 0.24917126 | -0.0161069 |
| 0.6960041  | -0.057184  | 1.01743776 | 0.65487786 | 0.3020277  | 0.11006726 | 0.07563768 |
| 1.21892552 | 0.04319935 | 0.52310154 | 0.99358663 | 0.58365561 | 0.24107243 | 0.05646961 |
| 0.95429834 | 0.03763523 | 0.90202712 | 1.17602299 | -0.0769341 | 0.03674678 | 0.12602151 |
| -0.1589849 | -0.057698  | 0.95478627 | 1.34217263 | 0.29201821 | 0.0892955  | -0.0630268 |
| 0.24225555 | -0.1079684 | 0.76249955 | 0.7390885  | 0.44910756 | -0.1574572 | 0.02488535 |
| 1.3120067  | 0.07417758 | 0.56503467 | 0.9956237  | 0.2559134  | 0.39759837 | 0.08813738 |
| 1.17011085 | 0.08322454 | 0.95959406 | -0.1385732 | 0.27247134 | 0.14251461 | 0.01171628 |

|            |            |            |            |            |            |            |
|------------|------------|------------|------------|------------|------------|------------|
| 0.89572788 | 0.0981891  | 0.96805706 | 0.68832005 | 0.03732657 | 0.17462271 | 0.05011531 |
| 0.66681691 | 0.21867223 | 0.93616903 | 0.63720334 | 0.45835258 | 0.21200919 | 0.18458836 |
| 1.14576806 | -0.0356683 | 0.85087452 | 0.97376453 | 0.26932033 | 0.2898341  | 0.06875683 |
| 1.71460349 | -0.1759862 | 1.22718406 | 0.96498783 | -0.0043186 | 0.17422949 | 0.0322675  |
| 0.99023415 | -0.0063453 | 0.4484337  | 1.10940621 | 0.45106625 | 0.33520693 | 0.06580114 |
| 1.13767405 | 0.04445184 | 0.6186903  | 0.82476245 | 0.56516206 | 0.36664169 | 0.1632161  |
| 1.22208067 | 0.0390142  | 1.21532198 | 1.16502859 | 0.25658003 | 0.43016677 | 0.01838905 |
| 1.25698417 | -0.1574408 | 0.63576449 | 1.00540295 | 0.23226983 | 0.10130637 | -0.1640288 |
| 0.96376232 | -0.0290819 | 0.69819156 | 0.52283884 | 0.5951581  | 0.56086002 | -0.0388596 |
| 0.77653313 | -0.0320228 | 1.13290458 | 0.59290036 | 0.30704326 | 0.35727491 | -0.033766  |
| 1.25956855 | -0.0331801 | 1.55563059 | 0.78691687 | 0.48816129 | 0.23665961 | -0.0436303 |
| 1.39040226 | -0.1159584 | 0.78388891 | 0.34738974 | 0.6239381  | 0.42701187 | 0.08045659 |
| 0.72471462 | 0.29722529 | 0.89517922 | 0.82476245 | 0.18325078 | 0.08782807 | 0.03056002 |
| 1.50822804 | -0.0282037 | -0.0263023 | 1.09918432 | 0.41695333 | -0.1439578 | 0.02650403 |
| 0.89479994 | -0.1342474 | 0.56748281 | 1.0597975  | 0.26884483 | 0.04817118 | -0.0626048 |
| 1.41018757 | -0.1833378 | 1.17202586 | -0.1467876 | -0.043934  | 0.10723491 | 0.19695494 |
| 1.01086376 | -0.1996324 | 0.04638508 | 0.23964991 | 0.4929479  | -0.0528956 | 0.23543362 |
| 1.53925002 | -0.0243982 | 0.5995452  | 0.86091676 | -0.2244341 | -0.0216165 | 0.0335431  |
| 1.02795461 | -0.1139285 | 1.21351511 | 0.98765186 | 0.20101336 | -0.2178609 | 0.08058143 |
| 0.67519754 | 0.03714223 | 0.56321739 | -0.2564151 | 0.07853388 | 0.32087064 | -0.2558869 |
| 2.2694736  | 0.0042893  | 0.88136768 | 0.81631071 | 0.38419779 | 0.02287369 | 0.19268878 |
| 0.80120841 | 0.15243987 | 0.75023412 | 1.22963591 | 0.67641091 | 0.28143813 | 0.12218128 |
| 0.79579001 | -0.088312  | 0.57349621 | 1.002019   | 0.72917727 | 0.25345155 | 0.11112237 |
| 0.76968081 | -0.011825  | 0.97726878 | 1.13333657 | -0.1185366 | 0.21569807 | 0.24198513 |
| -0.2754106 | -0.0701745 | 0.27885994 | 0.88444113 | 0.40981623 | -0.2387829 | 0.37287098 |
| 0.69662483 |            | -0.2207613 | -0.1250735 | 0.28837154 | 0.34558155 | -0.0211595 |
| 1.02581253 |            | -0.0753956 | 0.16392448 | 0.12195315 | -0.0816639 | 0.25337036 |
| 1.2628615  |            |            | -0.1250735 | 0.08345109 | -0.1229376 | 0.05728876 |
| 0.88011038 |            |            | 0.90721908 | 0.6509988  |            | 0.11343846 |
| 1.1339165  |            |            |            | 0.2000783  |            | 0.06781683 |
| 0.71834562 |            |            |            | 0.19995606 |            | 0.2901789  |
| 1.39260725 |            |            |            | 0.44508799 |            | 0.05291997 |
| 1.74400266 |            |            |            | 0.47604076 |            | 0.3982817  |
| 1.48488425 |            |            |            |            |            | -0.0294057 |
| 1.2165907  |            |            |            |            |            |            |
| -0.2252067 |            |            |            |            |            |            |
| -0.2857712 |            |            |            |            |            |            |
| -0.1970442 |            |            |            |            |            |            |
| 0.88936924 |            |            |            |            |            |            |
| 1.38626789 |            |            |            |            |            |            |
| 1.44696952 |            |            |            |            |            |            |
| -0.2056085 |            |            |            |            |            |            |
| 0.81279879 |            |            |            |            |            |            |

1.19143092

-0.0643911
