# Supplementary material for: The O-GlcNAc transferase OGT is a conserved and essential regulator of the cellular and organismal response to hypertonic stress
Source: PubMed Central journal article supplement (PMC7556452; doi:10.1371/journal.pgen.1008821), 2020-10-02
Supplement: pgen.1008821.s032.pdf [file pgen.1008821.s032.pdf]

| WT         | <i>ogt-1(dr20)</i> | CeOGT      | <i>hsOGT</i> | <i>hsOGT H498A</i> |
|------------|--------------------|------------|--------------|--------------------|
| 0.63059554 | -0.0170701         | 0.89971849 | -0.1321337   | 0.31752395         |
| 0.85563988 | -0.1080803         | 1.5356763  | 0.11962123   | 0.22516553         |
| 1.03292592 | 0.02772431         | 0.62239014 | 0.07127747   | 0.07102873         |
| 1.17713058 | -0.0525086         | 1.47239997 | 0.04770674   | 0.06882475         |
| 0.9099938  | -0.0491342         | 0.44103953 | 0.50980851   | 0.23065091         |
| 1.26974688 | -0.0476583         | 0.31152187 | 0.16029209   | 0.36955988         |
| 1.26523219 | 0.05779264         | 0.58912502 | 0.08414383   | 0.214325           |
| 0.61169903 | -0.0686067         | 0.64718424 | 0.32100345   | 0.18083865         |
| 1.11061804 | -0.0485407         | 0.70716895 | 0.1197929    | 0.14353505         |
| 0.79223805 | 0.03764593         | 0.4516541  | 0.24931587   | 0.02744808         |
| 0.89462493 | 0.00825568         | 0.41855961 | 0.21534072   | 0.23765457         |
| 1.23790442 | -0.0545633         | 0.62512342 | 0.1614939    | 0.00537919         |
| 1.14619568 | 0.05805828         | 0.59464978 | 0.19749436   | 0.10022731         |
| 0.97470959 | 0.01876278         | 0.91021193 | -0.0401393   | 0.14818774         |
| 1.83118999 | -0.0236965         | 0.75395758 | 0.18564822   | 0.11376412         |
| 0.45854911 | -0.0644158         | 0.50558189 | 0.07580215   | 0.25949438         |
| 0.89262525 | 0.11208064         | 0.66554962 | 0.19565439   | 0.2153438          |
| 0.90234201 | 0.04570959         | 0.51992497 | 0.09584981   | 0.24121062         |
| 1.31590948 | 0.05838291         | 0.23648217 | 0.22797057   | 0.1290594          |
| 0.89464715 | 0.01464819         | 0.64853764 | 0.03079249   | 0.12245884         |
| 0.71908536 | 0.02649575         | 0.61592819 | -0.1810946   | 0.10953286         |
| 0.93340853 | -0.0125528         | 0.9750577  | 0.09166699   | 0.13176436         |
| 1.17977931 | 0.01030992         | 0.39758269 | 0.15676617   | 0.11944809         |
| 1.04038907 | -0.072438          | 0.34540365 | 0.12451026   | -0.0019637         |
| 0.78723821 | -0.0111154         | 0.78222821 | 0.07463148   | -0.0029562         |
| 2.87589355 | -0.0189595         | 0.24925657 | 0.19155214   | 0.1024844          |
| 1.35322408 | -0.0368637         | 0.56862077 | 0.16833632   | 0.16492854         |
| 0.67730674 | -0.0489306         | 1.17991618 | 0.21601311   | 0.21771209         |
| 1.05724108 | 0.18502067         | 0.58366567 | 0.25617096   | 0.21746145         |
| 1.06104105 | 0.04102403         | 1.47977206 | 0.10605488   | 0.22758765         |
| 0.55873807 | 0.01499104         | 0.6940983  | 0.21314697   | 0.1185924          |
| 0.89171068 | -0.0478451         | 0.35376326 | 0.19770017   | 0.2750029          |
| 1.01876205 | 0.06607742         | 0.34932474 | 0.12586932   | 0.30278937         |
| 0.98057341 |                    | 0.63407293 | 0.49676255   | 0.20232843         |
| 0.95487512 |                    | 0.44082177 | 0.13432829   | 0.32149125         |
| -0.2937839 |                    | 0.36989813 | 0.18174045   | 0.2038509          |
