# Supplementary material for: The O-GlcNAc transferase OGT is a conserved and essential regulator of the cellular and organismal response to hypertonic stress
Source: PubMed Central journal article supplement (PMC7556452; doi:10.1371/journal.pgen.1008821), 2020-10-02
Supplement: pgen.1008821.s033.pdf [file pgen.1008821.s033.pdf]

| rls4 50mM NaCl | s4 250mM NaI | r20 50mM NaCl | r20 250mM NaI | r86 50mM NaCl | r86 250mM NaI | r90 50mM NaCl |
|----------------|--------------|---------------|---------------|---------------|---------------|---------------|
| 0.996205094    | 7.437863669  | 1.418048806   | 2.222044516   | 0.762741066   | 5.402335326   | 0.805026255   |
| 1.000996967    | 6.853976377  | 1.160922744   | 2.124895169   | 1.242866495   | 3.962797583   | 1.125701721   |
| 1.109721588    | 7.966374508  | 1.344804124   | 2.633868177   | 1.166513784   | 4.774759072   | 1.005703496   |
| 0.990285023    | 5.130023103  | 1.208346058   | 2.485380367   | 0.80715228    | 3.255976481   | 1.093795765   |
| 1.136189086    | 4.928747553  | 1.256515981   | 1.108265974   | 1.006579228   | 3.80289366    | 1.036416315   |
| 0.886533188    | 5.30858094   | 0.939213524   | 1.779126048   | 1.181126974   | 5.049806379   | 1.07603841    |
| 1.173101326    | 5.765403658  | 1.128389751   | 1.25821798    | 1.073871433   | 3.721868844   | 1.227335109   |
| 0.652523753    | 8.764464546  | 0.966072296   | 1.282705816   | 0.908793678   | 4.422036373   | 0.81892999    |
| 1.046015349    | 5.357294828  | 0.922521741   | 1.498211409   | 1.056425488   | 7.099416776   | 0.798831839   |
| 1.110656747    | 4.65451806   | 1.009190221   | 1.940403602   | 1.178959769   | 5.251472238   | 1.433431871   |
| 1.409846775    | 6.713958984  | 0.748515857   | 1.995677392   | 0.861204003   | 6.500092182   | 0.633429102   |
| 0.979505703    | 7.525876667  | 0.793847513   | 2.382931077   | 1.004180486   | 3.69676563    | 1.031371712   |
| 1.112026026    | 7.210829215  | 1.196152657   | 1.900269222   | 1.105169167   | 5.221769341   | 1.105335781   |
| 1.134233511    | 6.983690713  | 0.875157145   | 1.003717475   | 0.879269809   | 2.684919836   | 1.113788068   |
| 1.070724373    | 6.866783115  | 0.767584593   | 1.90092613    | 0.945061326   | 4.336077995   | 1.357749262   |
| 1.129696577    | 7.534806943  | 1.229076417   | 2.31430445    | 1.086846118   | 5.748530657   | 1.306447522   |
| 0.802887457    | 6.88155039   | 1.052087948   | 2.236024063   | 0.87466689    | 7.556417067   | 1.247127329   |
| 0.698637339    | 7.574593907  | 1.058329571   | 1.47633971    | 0.903102708   | 3.826499695   | 1.235306217   |
| 1.018384755    | 6.485794455  | 1.063083971   | 3.150302319   | 0.838670041   | 3.859701428   | 0.986953092   |
| 0.781201337    | 4.984368442  | 1.196657256   | 2.138504328   | 1.134128982   | 4.84065361    | 0.759447981   |
| 1.009441386    | 6.342859031  | 0.975600017   | 1.483229295   | 0.956624924   | 4.24117857    | 0.905090514   |
| 1.118993164    | 6.643217258  | 1.143996268   | 1.929806255   | 0.759004053   | 4.41102959    | 1.031312387   |
| 1.004174735    | 5.489614388  | 0.936005317   | 1.893572753   | 0.823760351   | 3.403839941   | 0.789990943   |
| 1.021689411    | 6.713035215  | 1.046164863   | 1.320225458   | 0.956624924   | 4.703405876   | 0.907484142   |
| 0.824133305    | 4.912842582  | 0.798388975   | 2.2149995     | 0.791111313   | 5.516873901   | 1.031764915   |
| 1.070022259    | 4.879837898  | 0.904840838   | 1.430364366   | 1.400193139   | 3.932791354   | 0.771152698   |
| 0.682506469    | 6.339168397  | 0.809753942   | 2.438736823   | 1.00910643    | 4.533035532   | 0.910796127   |
| 1.035341723    | 5.471913163  | 1.257949457   | 2.608311491   | 0.945265003   | 1.390095592   | 0.930030331   |
| 0.904495625    | 7.135830737  | 1.052569954   | 1.594380385   | 0.915289279   | 4.085933512   | 0.893885147   |
| 0.945712507    | 5.475285091  | 0.929295996   | 2.712643951   | 1.363465409   | 4.116581377   | 0.729702161   |
| 1.126922614    | 6.102239128  | 0.978670356   | 0.909235639   | 1.032888366   | 4.682427259   | 1.027873561   |
| 0.784511512    | 7.258436944  | 1.175921745   | 0.974739953   | 0.802881633   | 4.334445826   | 1.063565889   |
| 0.961659272    | 3.258467679  | 1.043915046   | 2.308385513   | 1.121229367   | 2.64409791    | 0.99440791    |
| 1.142658071    | 5.683350063  | 0.883653816   | 1.935047537   | 0.939220023   | 5.093480034   | 0.814776441   |
| 0.847079915    | 7.77881837   | 0.936776397   | 1.789599771   | 0.66316487    | 3.869031853   |               |
| 1.113239986    | 5.617489837  | 1.148628747   | 1.351727868   | 0.804931543   | 4.062130282   |               |
| 0.972352296    | 5.187752425  | 1.054023379   | 0.922351649   | 0.794340339   | 3.906591829   |               |
| 0.931170934    | 4.509766774  | 0.927259783   | 1.595946294   | 1.042201594   | 3.547293378   |               |
| 0.919948353    | 5.809275327  | 0.783395754   | 2.392707315   | 1.010978613   | 4.957630893   |               |
| 0.999731484    | 6.898047167  | 1.000179594   | 1.822678705   | 1.030322614   | 2.757365313   |               |
| 0.994039431    | 9.209482964  | 1.00554672    | 2.564522161   | 1.040539391   | 3.111028132   |               |
| 0.841914793    | 4.86573432   | 1.008890581   | 1.257131811   | 0.845101293   | 3.276276932   |               |

|             |             |             |             |             |             |
|-------------|-------------|-------------|-------------|-------------|-------------|
| 1.148565873 | 6.406572179 | 0.91497911  | 1.49354616  | 0.840745101 | 4.521918523 |
| 0.78691063  | 5.306529694 | 0.939057508 | 1.072583168 | 1.080790435 | 5.01384906  |
| 1.169804148 | 5.68941392  | 0.942302683 | 1.560120971 | 1.153264492 | 4.186640843 |
| 0.863187451 | 6.802757165 | 1.267486852 | 2.347197874 | 1.045839944 | 3.578631033 |
| 1.042395919 | 5.626106326 | 0.942198169 | 1.439339859 | 1.258438322 | 3.786545194 |
| 0.995906829 | 7.406227559 | 0.730175235 | 1.551718959 | 0.994034837 | 4.297880093 |
| 0.945194593 | 7.500274893 | 0.860985128 | 1.8086581   | 1.445071124 | 3.825733169 |
| 1.12903244  | 7.410752812 | 0.910488605 | 1.582294702 | 1.116241554 | 3.355316552 |
| 1.093997704 | 4.613335228 | 0.844503299 | 1.818054294 |             | 4.757636313 |
| 1.011571169 | 4.885174387 | 0.713488715 | 1.528052158 |             | 4.322647537 |
| 1.182098899 | 3.848547039 | 0.798388975 | 1.606864496 |             | 3.836232798 |
| 1.125459553 | 5.423031033 |             | 1.280970755 |             | 3.366583867 |
| 1.014763572 | 6.868994804 |             | 2.057457564 |             | 3.831619248 |
|             | 7.612178927 |             | 1.653535459 |             | 3.644695079 |
|             | 7.143519457 |             | 1.172513277 |             | 3.826499695 |
|             | 7.215371183 |             | 1.10052441  |             | 2.958232985 |
|             | 6.146497272 |             | 1.160822361 |             | 4.567577961 |
|             | 6.48935736  |             | 1.900132424 |             | 3.266830433 |
|             | 5.413501238 |             | 1.625291841 |             | 3.70692158  |
|             | 5.954674979 |             | 1.382342541 |             | 4.131673011 |
|             | 7.043340516 |             | 2.022585402 |             | 2.762020001 |
|             | 6.862978569 |             | 1.448040357 |             | 3.823604342 |
|             | 8.158919722 |             | 0.90143082  |             | 4.135912505 |
|             | 6.567646495 |             | 1.34704992  |             | 3.816195912 |
|             | 6.748948348 |             | 0.797190192 |             | 3.377904872 |
|             | 6.256899152 |             | 1.984780067 |             | 2.430768249 |
|             | 8.480725011 |             | 2.01673978  |             | 4.40682985  |
|             | 7.108039186 |             | 1.756906811 |             | 3.373835873 |
|             | 4.68184362  |             | 1.358452882 |             | 4.241407947 |
|             | 2.784756095 |             | 3.47523265  |             | 4.499596635 |
|             | 5.858756047 |             | 1.116950147 |             | 3.338277445 |
|             | 7.764728739 |             | 1.165083757 |             | 4.593853737 |
|             | 8.759983527 |             |             |             | 3.27547465  |
|             | 5.824213463 |             |             |             | 5.56038237  |
|             | 7.759532044 |             |             |             | 3.265302764 |
|             | 5.957253191 |             |             |             | 4.133253691 |
|             | 6.36230215  |             |             |             | 4.335213373 |
|             | 8.706972835 |             |             |             | 2.695942967 |
|             | 6.71651961  |             |             |             | 5.941977238 |
|             | 5.245925463 |             |             |             | 3.778800946 |
|             | 8.513655363 |             |             |             | 2.941621641 |
|             | 6.838325344 |             |             |             | 7.917045184 |
|             | 9.090371486 |             |             |             |             |

7.714797591  
5.780611139  
9.885658014  
6.728423056  
5.096375535  
6.725454297  
5.052786008  
5.0274455  
6.25524129  
5.105515376

r90 250mM NaCl

5.106470169

4.838255642

4.75348836

5.31637066

3.619594866

4.783473845

3.651768402

6.759449778

4.420514538

5.675714618

6.541125009

6.906962633

5.659578517

4.472855533

5.373261364

4.067745346

4.026356579

3.171842053

3.449501123

4.087056369

6.599750652

4.00635051

4.680318954

4.583388042

6.016360841

5.509841686

4.364514584

6.250194831

5.065952608

6.18056154

4.522891663

5.564408934

4.280919342

4.151808077

3.875887609

5.770012526

7.744046353

4.590115173

4.008669785

4.845065421

4.808761481

3.817195198

3.640210873  
3.140356768  
4.797232118  
7.449722221  
2.834831746  
4.676498737  
3.468403714  
5.565542622  
6.092915747  
5.651035213  
4.495146602  
4.244305675  
6.006459138  
6.797999483  
5.508764844  
5.488088433  
4.603323695  
3.715924911  
6.305426341  
4.833895626  
5.414390031  
4.07666717  
10.12419323  
3.639389526
