# Supplementary material for: The O-GlcNAc transferase OGT is a conserved and essential regulator of the cellular and organismal response to hypertonic stress
Source: PubMed Central journal article supplement (PMC7556452; doi:10.1371/journal.pgen.1008821), 2020-10-02
Supplement: pgen.1008821.s034.pdf [file pgen.1008821.s034.pdf]

|             | Unadapted |   |   |   |   |  | Adapted |      |      |      |      |
|-------------|-----------|---|---|---|---|--|---------|------|------|------|------|
| WT(drls4)   | 0         | 0 | 0 | 0 | 0 |  | 20.0    | 25.0 | 65.0 | 50.0 | 70.0 |
| ogt-1(dr20) | 0         | 0 | 0 | 0 | 0 |  | 5.0     | 5.0  | 25.0 | 0.0  | 10.0 |
| ogt-1(dr86) | 0         | 0 | 0 | 0 | 0 |  | 40.0    | 65.0 | 40.0 | 35.0 | 55.0 |
| ogt-1(dr90) | 0         | 0 | 0 | 0 | 0 |  | 78.9    | 80.0 | 86.7 | 73.7 | 71.4 |
