# Supplementary material for: The O-GlcNAc transferase OGT is a conserved and essential regulator of the cellular and organismal response to hypertonic stress
Source: PubMed Central journal article supplement (PMC7556452; doi:10.1371/journal.pgen.1008821), 2020-10-02
Supplement: pgen.1008821.s035.pdf [file pgen.1008821.s035.pdf]

| <i>ev(RNAi)</i> | <i>ogt-1(RNAi)</i> |
|-----------------|--------------------|
| 0.846364794     | 0.349242811        |
| 0.771397344     | 0.376181128        |
| 0.714720603     | 0.37585543         |
| 1.101702575     | 0.613454595        |
| 1.146974969     | 0.441437982        |
| 0.992552413     | 0.362225243        |
| 0.64283112      | 0.402686005        |
| 0.607854422     | 0.522065745        |
| 1.336465379     | 0.367624395        |
| 0.859297853     | 0.506362273        |
| 1.711609544     | 0.354408755        |
| 0.599528303     | 0.436587015        |
| 0.801730068     | 0.344690466        |
| 1.092040102     | 0.508912567        |
| 0.63984676      | 0.350161744        |
| 0.80428917      | 0.319795694        |
| 1.064109541     | 0.460329339        |
| 1.154053334     | 0.332335328        |
| 0.900470733     | 0.380800896        |
| 0.79713487      | 0.2991149          |
| 1.370667618     | 0.631743422        |
| 0.829329508     | 0.543025493        |
| 0.677171155     | 0.400762234        |
| 0.693075392     | 0.661261168        |
| 0.694786689     | 0.601519887        |
| 0.69857599      | 0.296096635        |
| 0.965378788     | 0.35790464         |
| 0.861869872     | 0.462625882        |
| 0.847166478     | 0.36556886         |
| 0.838972874     | 0.449641333        |
| 0.80349481      | 0.38468662         |
| 0.913778412     | 0.568685039        |
| 0.954046272     | 0.618481993        |
| 0.75346494      | 0.43371061         |
| 0.710198994     | 0.563934152        |
| 1.137153401     | 0.502215675        |
| 0.802939692     | 0.609281434        |
| 0.783085183     | 0.572539052        |
| 0.745650878     | 0.519823446        |
| 0.953379972     | 0.705335697        |
| 0.871817607     | 0.478465126        |
| 1.173224396     | 0.729314435        |

|             |             |
|-------------|-------------|
| 0.869481905 | 0.422134943 |
| 0.82584412  | 0.492694999 |
| 1.158278862 | 0.402215128 |
| 0.893297172 | 0.381937615 |
| 0.626361713 | 0.379967634 |
| 1.086776283 | 0.357514511 |
| 0.673517709 | 0.537026905 |
| 0.938459227 | 0.448652692 |
| 0.787616926 | 0.333622024 |
| 0.97438036  | 0.47672784  |
| 1.177974292 | 0.387600912 |
| 1.30934689  | 0.51037211  |
| 0.752778515 | 0.366546317 |
| 0.709352367 | 0.455936499 |
| 0.940771278 | 0.39967441  |
| 0.639832031 | 0.581586823 |
| 0.83708141  | 0.409044441 |
| 0.741755687 | 0.438849813 |
| 0.647056301 | 0.873250223 |
| 0.601458868 | 0.567899603 |
| 0.477456971 | 0.359537902 |
| 0.891994989 | 0.398068717 |
| 1.260946688 | 0.417284814 |
| 0.751676888 | 0.610020853 |
| 1.329533746 | 0.773652454 |
| 0.774084204 | 0.491256329 |
| 0.633342968 | 0.349067488 |
| 0.988145327 | 0.591173419 |
| 0.808545968 | 0.516511854 |
| 1.283389605 | 0.771181689 |
| 0.684580162 | 0.569732961 |
| 0.818442386 | 0.371345344 |
| 0.847068282 | 0.3294873   |
| 0.752594687 | 0.617514967 |
| 0.741581879 | 0.696507622 |
| 0.541392225 | 0.580080122 |
| 1.182937667 | 0.436550903 |
| 0.764460154 | 0.316220627 |
| 0.573337729 | 0.465834106 |
| 0.939426728 | 0.612369009 |
| 0.742926968 | 0.400189944 |
| 0.768909484 | 0.375704135 |
| 1.101905842 | 0.948007826 |

|             |             |
|-------------|-------------|
| 1.376886618 | 0.589627194 |
| 1.135840423 | 0.497112467 |
| 0.776392147 | 0.298373511 |
| 1.091098688 | 0.359969337 |
| 1.514841041 | 0.719151857 |
| 0.766890992 | 0.357514511 |
| 0.678876173 | 0.411130171 |
| 1.923111519 | 0.730747989 |
| 0.987798413 | 0.468353457 |
| 0.796268435 | 0.560186442 |
| 0.904447899 | 0.707201665 |
| 0.860566234 | 0.392928313 |
| 1.035007936 | 0.498301657 |
| 1.563040529 | 0.382414459 |
| 1.112231079 | 0.608879533 |
| 1.324661205 | 0.525914281 |
| 0.820374954 | 0.435501578 |
| 0.928246702 | 0.454000205 |
| 0.845360993 | 0.313703256 |
| 0.616854824 | 0.665857567 |
| 0.769483207 | 0.966022226 |
| 0.7606459   | 0.884039138 |
| 0.725647562 | 0.323964942 |
| 0.914842372 | 0.785401849 |
| 0.57266062  | 0.799681882 |
| 0.868483361 | 0.441437982 |
| 0.828893904 | 0.656493853 |
| 0.606944071 | 0.371690827 |
| 1.008684574 | 0.537282025 |
| 0.688080254 | 0.657644278 |
| 1.015422284 | 0.450459597 |
| 0.837783441 | 0.55035458  |
| 1.01047423  | 0.434246636 |
| 0.859674352 | 0.583957702 |
| 0.919739688 | 0.616337145 |
| 1.461141189 | 0.379523041 |
| 0.796350192 | 0.532693389 |
| 0.708601502 | 0.375360883 |
| 1.435656169 | 0.424739461 |
| 0.604205389 | 0.391826312 |
| 1.248396668 | 0.656811374 |
| 1.643967064 | 0.318332435 |
| 0.651283863 | 0.349826661 |

|             |             |
|-------------|-------------|
| 0.783812281 | 0.33834226  |
| 0.801730068 | 0.341906743 |
| 0.938768785 | 0.424159414 |
| 1.076742126 | 0.508225568 |
| 0.896688903 | 0.354179557 |
| 1.062152125 | 0.34185535  |
| 0.832510678 | 0.392340317 |
| 0.76285789  | 0.565719566 |
| 0.835680456 | 0.415967206 |
| 0.736233933 | 0.472948052 |
| 1.131401027 | 0.300311897 |
| 0.978563846 | 0.459316545 |
| 0.936361918 | 0.375704135 |
| 0.702032356 | 0.306756278 |
| 1.085670336 | 0.331581733 |
| 0.581211738 | 0.569882173 |
| 0.715361321 | 0.374890461 |
| 1.165170224 | 0.359811871 |
| 0.807130534 | 0.987842325 |
| 0.615105471 | 0.564543986 |
| 0.802732481 | 0.401604746 |
| 1.305679067 | 0.327206696 |
| 0.67876261  | 0.6629771   |
| 0.899292455 | 0.321480154 |
| 0.754082028 | 0.298608228 |
| 1.108565033 | 0.45605799  |
| 0.710577296 | 0.35150852  |
| 0.847720785 | 0.456961076 |
| 0.557640491 | 0.370196314 |
| 0.960771178 | 0.35253833  |
| 0.810275641 | 0.463427506 |
| 1.485298498 | 0.596980027 |
| 0.719150051 | 0.392428405 |
| 0.569225077 | 0.314336674 |
| 1.680768197 | 0.488309329 |
| 0.658218969 | 0.461302748 |
| 1.075473879 | 0.670884682 |
| 0.724295004 | 0.411924046 |
| 1.006186375 | 0.916928474 |
| 1.237398888 | 0.778401832 |
| 0.864853114 | 0.37050898  |
| 1.178993301 | 0.363351799 |
| 1.023715754 | 0.499036721 |

|             |             |
|-------------|-------------|
| 1.414543578 | 0.464563016 |
| 1.240690516 | 0.429156566 |
| 1.046227167 | 0.565812652 |
| 0.541757045 | 0.450743918 |
| 1.085670336 | 0.485009837 |
| 0.578469519 | 1.745825648 |
| 1.10759218  | 0.389867584 |
| 1.200435666 | 0.421405026 |
| 0.736233933 | 0.446388711 |
| 0.607340853 | 0.647465284 |
| 0.712131036 | 0.645457519 |
| 1.390509748 | 0.865341572 |
| 0.839668025 | 0.618394618 |
| 1.366007747 | 0.41044408  |
| 0.747935664 | 0.398763203 |
| 1.102423585 | 0.668723525 |
| 0.729222181 | 0.650534864 |
| 1.248986927 | 0.368663816 |
| 0.982773571 | 0.34498299  |
| 1.606174717 | 0.556757172 |
| 1.619101124 | 0.306314567 |
| 0.7142568   | 0.996246731 |
| 0.735055958 | 0.316705696 |
| 0.950503394 | 0.616366102 |
| 0.737049704 | 0.452650122 |
| 0.893297172 | 0.481011658 |
| 0.773549899 | 0.385596877 |
| 1.498076002 | 0.292800689 |
| 1.259511601 | 0.336000791 |
| 1.169793915 | 0.607661005 |
| 1.414849558 | 0.555890793 |
| 1.346804484 | 0.449232347 |
| 0.925047994 | 0.424035933 |
| 0.835057279 | 0.675056134 |
| 1.270638218 | 0.527262779 |
| 0.742827072 | 0.372522616 |
| 0.865616219 | 0.465100331 |
| 0.7646139   | 0.569303666 |
| 0.805593423 | 0.496222648 |
| 0.788922879 | 0.587117171 |
| 0.817594021 | 0.421894518 |
| 0.504006953 | 0.454845515 |
| 0.594891779 | 0.467588077 |

|             |             |
|-------------|-------------|
| 0.84119185  | 0.476224072 |
| 1.086962459 | 0.409965079 |
| 0.9995373   | 0.610735566 |
| 0.729994662 | 0.479072095 |
| 0.701876349 | 0.441813195 |
| 0.809023854 | 0.511610364 |
| 1.133800256 | 0.488355348 |
| 0.85652707  | 0.40768096  |
| 0.820374954 | 0.544286098 |
| 0.801450502 | 0.808130519 |
| 1.421825184 | 0.574465352 |
| 1.179991371 | 0.624584648 |
| 0.897285105 | 0.958659599 |
| 0.777463033 | 0.384410383 |
| 1.346170825 | 0.361665173 |
| 1.814415379 | 0.50560119  |
| 0.786289497 | 0.441245483 |
| 0.849212376 | 0.333594174 |
| 1.184612467 | 0.463449367 |
| 1.438825388 | 0.348293503 |
| 1.401344889 | 0.298443529 |
| 0.770083769 | 0.518744078 |
| 0.743425055 | 0.423382466 |
| 0.563002419 | 0.363491765 |
| 1.158792719 | 0.404234798 |
| 0.853148984 | 0.350609521 |
| 0.684139402 | 0.580774551 |
| 0.851776866 | 0.331740658 |
| 1.642964144 | 0.453077554 |
| 0.949853324 | 0.461105847 |
| 1.206312353 | 0.57702993  |
| 1.835676605 | 0.665196502 |
| 0.594440731 | 0.389297468 |
| 1.205242216 | 0.515071733 |
| 0.783352904 | 0.604410725 |
| 0.531463217 | 0.47925186  |
| 0.678673825 | 0.496696821 |
| 0.909064138 | 0.470712219 |
| 0.531724507 | 1.005587996 |
| 1.422238821 | 0.514243945 |
| 0.682734267 | 0.684835564 |
| 0.83786892  | 0.419188083 |
| 1.00969225  | 0.464706179 |

|             |             |
|-------------|-------------|
| 0.785316195 | 0.633411392 |
| 1.068574069 | 0.463884728 |
| 1.218132507 | 0.4060789   |
| 0.607340853 | 1.560747335 |
| 0.677835774 | 0.4511026   |
| 1.491762272 | 0.316220627 |
| 0.628283068 | 0.607194854 |
| 1.894969951 | 0.738799344 |
| 0.658487629 | 0.536583081 |
| 1.529694782 | 0.48731863  |
| 0.682351828 | 0.441158387 |
| 1.188824055 | 0.758319026 |
| 1.304751795 | 0.393374511 |
| 1.049355111 | 0.483841139 |
| 1.463264941 | 0.883202079 |
| 1.153433161 | 0.539627401 |
| 0.744061004 | 0.422069959 |
| 0.620824289 | 0.712906026 |
| 0.59632655  | 0.352976196 |
| 0.616217716 | 0.424609849 |
| 0.835156484 | 0.508508514 |
| 0.831913279 | 0.498071761 |
| 1.019796522 | 0.63466816  |
| 0.706212743 | 0.452007568 |
| 1.166995365 | 0.645705868 |
| 1.020911053 | 0.391513965 |
| 1.159061861 | 0.429664728 |
| 1.20972267  | 0.308063646 |
| 1.371986153 | 0.898518969 |
| 0.717196749 | 0.534457398 |
| 1.63163463  | 0.894320604 |
| 0.897034817 | 0.933991387 |
| 1.003415602 | 0.853917161 |
| 0.856708576 | 0.536899436 |
| 0.662610539 | 0.355071106 |
| 0.747636882 | 0.532877932 |
| 1.352797332 | 0.576001356 |
| 1.204746435 | 0.737248247 |
| 1.129555304 | 0.35406185  |
| 0.900803871 | 0.465169957 |
| 1.249826676 | 0.422255171 |
| 0.660071802 | 0.529809943 |
| 0.613234371 | 0.527868829 |

0.867174867 0.902091444  
0.81122579 0.718815175  
1.030238314 0.596036185  
0.830694135 0.525818224  
0.585445127 0.739685194  
0.848834416 0.610020853  
1.345119293 1.011593221  
0.641725967 0.435201024  
3.533922877 0.345434938  
0.683206151 0.403486907  
1.475106697 0.643353093  
1.30400211 0.780523576  
0.592493022 0.758319026  
0.796175102 0.769068477  
0.699544534 0.503296289  
0.871916835 0.811271475  
0.888481553 0.845065003  
1.368569432 0.569352796  
0.770655259 0.579069132  
0.849965592 0.562520473  
1.321919581 0.609281434  
0.712588463 0.626085459  
0.819501285 0.503319446  
1.213230565 0.877138907  
0.863401612 0.74315469  
0.661157446 0.973157846  
0.665811556 0.516890397  
1.016459406 0.703017039  
0.620978263 0.414177867  
1.490638745 0.533373441  
1.018852765 0.668595122  
0.661527842 1.569832266  
0.912099217 1.322782061  
0.702076371 0.380800896  
0.904898434  
1.285254094  
1.023685268  
0.926959101  
1.185287874  
2.412535159  
0.950218471  
0.874645912  
1.512691378



1.519349129  
0.804522297  
0.665811556  
1.010874006  
0.963239395  
1.222148328  
0.640523521  
1.007102088  
1.355259423  
0.907676201  
0.600809881  
1.232634084  
0.886207512  
0.773686948  
0.960348533  
1.648653327  
1.05664294  
1.359624534  
1.446615376  
1.415989646  
1.455056928  
0.86045842  
0.669043651  
1.563948848  
0.735684504  
0.835951693  
0.969642594  
1.312841924  
1.267023539  
1.752563975  
0.727857618  
1.054079419  
0.972058864  
0.662610539  
1.0505887  
0.723145329  
1.311232634  
1.721871513  
1.240492481  
1.399817468  
0.950117951  
0.810394723  
1.1370109

0.907841401  
0.861393701  
1.394774837  
1.378581153  
1.276138817  
1.283228477  
1.131123042  
0.887189706  
1.799355731  
1.177418644  
1.347035418  
1.533541817  
0.764865252  
0.897285105  
1.16885281  
1.607934909  
1.101029543  
1.134345615  
0.768955441  
0.876222075  
1.358790294  
0.953815095  
1.388585475  
0.776582696  
1.290640394  
1.329311267  
1.188129243  
1.035151229  
0.95340873  
0.656043194  
1.326981001  
0.974195257  
0.963844282  
1.138623858  
0.866973232  
1.023640762  
1.900235902  
1.516722364  
0.610608193  
1.152755229  
0.786745775  
0.945479366  
1.258657463

1.134009612  
1.6635381  
1.438242937  
1.30623643  
1.393430987  
1.376112825  
1.418651781  
1.06947666  
1.404446252  
0.787616926  
1.558712412  
1.628860415  
1.546091259  
1.212331876  
1.417390823  
0.690430066  
0.913053296  
0.710991626  
1.132898745  
1.004833714  
1.070054287  
0.308743262  
2.729519135
