# Supplementary material for: The O-GlcNAc transferase OGT is a conserved and essential regulator of the cellular and organismal response to hypertonic stress
Source: PubMed Central journal article supplement (PMC7556452; doi:10.1371/journal.pgen.1008821), 2020-10-02
Supplement: pgen.1008821.s036.pdf [file pgen.1008821.s036.pdf]

| WT          | ogt-1(dr20) | t-1(dr20);drEx465 |
|-------------|-------------|-------------------|
| 4.240545033 | 2.29867815  | 8.02806254        |
| 4.680052451 | 1.55216012  | 8.8365011         |
| 4.498712087 | 2.42556167  | 9.82418752        |
| 4.582477235 | 2.85875673  | 8.88155153        |
| 1.937799281 | 2.71116481  | 7.59607689        |
| 2.598784327 | 2.09614679  | 6.05480874        |
| 4.670601114 | 1.87780634  | 9.08450088        |
| 5.093869575 | 2.78862666  | 10.2215649        |
| 7.566510101 | 2.73537881  | 9.16803552        |
| 7.32222084  | 2.32356598  | 7.57099997        |
| 6.076803742 | 2.01566889  | 8.24647678        |
| 7.816038582 | 2.32961378  | 7.30881583        |
| 3.188313219 | 2.16029619  | 9.68435159        |
| 3.271279057 | 2.39243225  | 1.95923968        |
| 5.519273926 | 1.3110614   | 5.19987299        |
| 9.727308544 | 3.20719246  | 11.8603973        |
| 7.121024865 | 1.35879337  | 12.2234724        |
| 3.292919429 | 1.88890698  | 9.65751671        |
| 6.591080584 | 2.22114597  | 10.5932527        |
| 3.338895728 | 2.2834052   | 8.30942752        |
| 3.508932622 | 1.58331142  | 2.68102827        |
| 7.557513062 | 2.53547628  | 5.70296819        |
| 5.95118772  | 2.49415153  | 10.0283175        |
| 7.656272466 | 1.70919891  | 9.67730401        |
| 5.827836602 | 1.95908504  | 12.8266045        |
| 3.576669808 | 2.58881221  | 8.74906705        |
| 3.515638349 | 1.93773469  | 1.97540115        |
| 2.894897683 | 2.12703424  | 10.8301501        |
| 4.326593241 | 2.23741504  | 4.56077127        |
| 3.624590782 | 2.71895844  | 8.99382493        |
| 4.887083729 | 2.09610121  | 9.09379449        |
| 3.536084447 | 1.77889619  | 9.52739289        |
| 9.070053546 | 2.76611341  | 7.87557376        |
| 4.365471964 | 2.09071375  | 7.46402235        |
| 1.521065573 | 2.12982489  | 0.37719394        |
| 5.699379493 | 2.60113307  | 9.99745361        |
| 4.534681773 | 3.12114583  | 0.98738775        |
| 4.139004169 | 2.25634472  |                   |
| 2.877685613 | 1.99153549  |                   |
| 6.614509297 | 2.32791722  |                   |
| 5.734704165 | 2.45263722  |                   |
| 6.599744768 | 2.33729642  |                   |

|             |            |
|-------------|------------|
| 3.849059778 | 2.46996582 |
| 5.203108212 | 2.23554599 |
| 2.153607423 | 2.46240198 |
| 6.231977835 | 1.69155268 |
| 7.905309061 | 2.1570498  |
| 7.041672966 | 2.20844259 |
| 3.904610902 | 2.40053496 |
| 5.337383372 | 1.39678483 |
| 3.118107693 | 2.35363806 |
| 6.474236157 | 2.64531223 |
| 6.539853736 | 1.95249236 |
| 4.48900089  | 2.60038175 |
| 5.396306988 | 2.29949648 |
| 5.607182948 | 1.91591235 |
| 6.975339998 | 1.90427052 |
| 2.022483724 | 1.12787642 |
