# Supplementary material for: The O-GlcNAc transferase OGT is a conserved and essential regulator of the cellular and organismal response to hypertonic stress
Source: PubMed Central journal article supplement (PMC7556452; doi:10.1371/journal.pgen.1008821), 2020-10-02
Supplement: pgen.1008821.s037.pdf [file pgen.1008821.s037.pdf]

| <i>ev(RNAi)</i> | <i>hsf-1(RNAi)</i> | <i>ogt-1(RNAi)</i> |
|-----------------|--------------------|--------------------|
| 1.115874503     | 0.193101743        | 0.60513166         |
| 0.903531414     | 0.144504196        | 1.037508795        |
| 1.11279179      | 0.392176563        | 1.595264587        |
| 0.898626698     | 0.554974194        | 1.438394482        |
| 1.32826209      | 0.25378366         | 1.127667151        |
| 0.710630979     | 0.451615381        | 1.379231107        |
| 0.945155668     | 0.377843549        | 0.682318484        |
| 0.874678996     | 0.374391411        | 1.678727606        |
| 0.867201172     | 0.410882664        | 1.918100081        |
| 1.069433857     | 0.427678083        | 1.265082659        |
| 0.573721765     | 0.381720767        | 1.495097688        |
| 0.82510168      | 0.360447597        | 2.628134683        |
| 1.355273397     | 0.361457254        | 1.845476923        |
| 0.76283042      | 0.178631687        | 1.74069123         |
| 1.434153438     | 0.141223085        | 1.173606094        |
| 0.732240805     | 0.260004513        | 1.337714645        |
| 0.846541809     | 0.321263997        | 1.270818983        |
| 1.092620803     | 0.434657793        | 1.47059983         |
| 0.744100965     | 0.497631504        | 1.701800611        |
| 1.158070452     | 0.239406753        | 1.420052997        |
| 0.886912448     | 0.338109537        | 0.727082563        |
| 0.874575862     | 0.309614012        | 1.660877522        |
| 1.039871805     | 0.37515285         | 1.350519263        |
| 0.951017798     | 0.425214979        | 1.145253027        |
| 1.03393801      | 0.30015175         | 1.435591832        |
| 0.745762363     | 0.220111283        | 2.134863983        |
| 0.723389492     | 0.532653105        | 1.522129369        |
| 0.739259855     | 0.267127535        | 1.820952313        |
| 0.940876179     | 0.300531881        | 1.090899255        |
| 1.179146055     | 0.163497295        | 1.162730378        |
| 1.051873147     | 0.251891154        | 1.439347685        |
| 1.047102726     | 0.202034138        | 1.336202249        |
| 1.112940655     | 0.56121397         | 0.961745687        |
| 1.001068837     | 0.304699504        | 1.409966428        |
| 0.725302704     | 0.278869404        | 1.432958552        |
| 0.680862466     | 0.299916152        | 1.332984699        |
| 0.81703496      | 0.42093495         | 1.150615848        |
| 0.844619917     | 0.441981698        | 1.2608832          |
| 0.98226017      | 0.495376237        | 1.329878167        |
| 0.821340809     | 0.389977038        | 1.925841917        |
| 0.722475712     | 0.395246998        | 1.258394279        |
| 0.663383699     | 0.375347496        | 1.447769493        |

|             |             |             |
|-------------|-------------|-------------|
| 1.429706247 | 0.254962501 | 1.990077798 |
| 1.057473274 | 0.37833118  | 1.653490507 |
| 0.782606575 | 0.208146635 | 1.306229792 |
| 0.863918778 | 0.246290653 | 1.134660257 |
| 0.876547717 | 0.225956935 | 1.875878252 |
| 1.096181538 | 0.328175549 | 1.684819461 |
| 0.752228281 | 0.366423197 | 1.571843229 |
| 0.844337867 | 0.46880615  | 2.048308208 |
| 0.888918906 | 0.318437968 | 1.362595865 |
| 1.00436292  | 0.178396645 | 1.23469878  |
| 1.001850587 | 0.551407812 | 1.960646625 |
| 0.740817201 | 0.314052154 | 1.25619319  |
| 0.842262215 | 0.465663539 | 1.336950764 |
| 0.618174103 | 0.260747711 | 1.778604584 |
| 1.058623152 | 0.440011763 | 0.920283323 |
| 0.982666873 | 0.369392591 | 1.588230896 |
| 1.053717173 | 0.299258441 | 2.398206583 |
| 1.154440138 | 0.306691004 | 1.540996379 |
| 1.071089871 | 0.366933879 | 1.38151002  |
| 1.15209689  | 0.235494878 | 1.313858418 |
| 0.663920241 | 0.39979363  | 1.789268098 |
| 1.351272962 | 0.219423538 | 1.069720221 |
| 0.711748323 | 0.346158616 | 1.388012533 |
| 0.693134004 | 0.209136934 | 1.365759736 |
| 0.878378366 | 0.264172969 | 1.344310058 |
| 0.801040095 | 0.20363333  | 1.107402673 |
| 1.20548681  | 0.44101244  | 1.045484136 |
| 1.321157651 | 0.154608644 | 1.266941367 |
| 0.986936221 | 0.585304154 | 0.99033279  |
| 1.098529326 | 0.149827405 | 0.938752958 |
| 0.622106213 | 0.233451361 | 1.124440356 |
| 1.319022667 | 0.262549406 | 1.497474199 |
| 1.279648856 | 0.269032338 | 1.479002489 |
| 0.809371505 | 0.257822657 | 1.509559242 |
| 0.884386425 | 0.337418913 | 1.098334483 |
| 0.789630737 | 0.227233528 | 1.871596385 |
| 1.30683887  | 0.426786232 | 1.490379431 |
| 0.893505038 | 0.401057466 | 1.134780128 |
| 0.901412162 | 0.32713457  | 1.171385939 |
| 0.933040659 | 0.33344474  | 1.288414949 |
| 1.013500258 | 0.402433307 | 1.568416951 |
| 0.756166208 | 0.523163299 | 1.092759018 |
| 0.803674033 | 0.236115938 | 1.328024756 |

|             |             |             |
|-------------|-------------|-------------|
| 0.935603958 | 0.259597684 | 0.987008935 |
| 0.86027991  | 0.283160401 | 1.32686914  |
| 0.903888569 | 0.289438216 | 1.230712597 |
| 0.917041512 | 0.2261524   | 1.166779476 |
| 1.086766061 | 0.371121887 | 2.289306609 |
| 0.741456718 | 0.348529762 | 0.964248599 |
| 0.920841408 | 0.267206151 | 2.181679791 |
| 1.044417528 | 0.17487102  | 1.450576025 |
| 0.914131368 | 0.554722964 | 1.07683836  |
| 0.822319047 | 0.175788175 | 2.195259177 |
| 0.945999557 | 0.363931807 | 1.287624706 |
| 0.937982612 | 0.320338947 | 1.366202164 |
| 0.931259082 | 0.302542339 | 1.162276659 |
| 0.838935983 | 0.142372865 | 2.516438615 |
| 0.830907888 | 0.349999961 | 0.010982588 |
| 1.127068475 | 0.278813528 | 1.262997619 |
| 1.203548121 | 0.261944156 | 0.863528195 |
| 1.101965586 | 0.392916234 | 1.110928956 |
| 1.115635427 | 0.430164005 | 0.918977888 |
| 0.699293221 | 0.275317766 | 1.085058229 |
| 0.935047937 | 0.197510571 | 1.577763242 |
| 0.752895742 | 0.335769042 | 1.774413564 |
| 0.572349013 | 0.282311189 | 1.955044226 |
| 0.792661362 | 0.181172678 | 1.077495965 |
| 1.024362376 | 0.241999606 | 1.270487384 |
| 1.03540888  | 0.339412105 | 1.905731076 |
| 0.758212802 | 0.389307533 | 1.89458645  |
| 0.762289215 | 0.389307533 | 1.911999928 |
| 0.904963667 | 0.324752853 | 1.431204625 |
| 0.697066608 | 0.238969081 | 0.940775363 |
| 0.853175349 | 0.332704973 | 2.277292177 |
| 0.933377132 | 0.376525538 | 1.093773336 |
| 0.95110125  | 0.445243555 | 1.798531269 |
| 1.381556557 | 0.346940655 | 1.289512985 |
| 0.862135238 | 0.235859986 | 0.93475552  |
| 0.900364637 | 0.15545893  | 1.600249244 |
| 1.508830237 | 0.342645353 | 0.710775315 |
| 0.666023156 | 0.255426536 | 0.96049329  |
| 1.140441933 | 0.267886367 | 1.820540798 |
| 0.890568106 | 0.274116282 | 0.646350476 |
| 0.93446802  | 0.330800392 | 0.957087564 |
| 1.200816499 | 0.199728539 | 1.325770092 |
| 0.771285437 | 0.363361277 | 1.521116791 |

|             |             |             |
|-------------|-------------|-------------|
| 0.87909953  | 0.294447932 | 2.062908735 |
| 1.08799754  | 0.257339843 | 0.868857384 |
| 0.887069803 | 0.251534299 | 1.290130512 |
| 1.380490193 | 0.628835749 | 1.86268909  |
| 0.863327704 | 0.365410307 | 1.379955426 |
| 0.763231738 | 0.517587481 | 1.526009332 |
| 0.739276065 | 0.297225742 | 1.125057861 |
| 1.083333317 | 0.335169454 | 1.181509165 |
| 0.936936923 | 0.272959972 | 1.267052123 |
| 1.079150563 | 0.171718696 | 0.926472488 |
| 1.101660944 | 0.178757042 | 2.171995105 |
| 0.666023156 | 0.651186368 | 1.215290134 |
| 0.984373847 | 0.243061818 | 1.161877936 |
| 1.022073271 | 0.217476363 | 1.554056206 |
| 0.910296184 | 0.217476363 | 1.089217884 |
| 0.613348836 | 0.269160938 | 1.574127042 |
| 0.684766166 | 0.25041396  | 1.013438645 |
| 1.068614413 | 0.288939185 | 1.563969432 |
| 1.009714406 | 0.30236016  | 1.288882232 |
| 0.883155156 | 0.353825719 | 1.160672043 |
| 0.939463748 | 0.309387188 | 1.184247706 |
| 0.859059193 | 0.322899281 | 1.371343055 |
| 0.795581913 | 0.355189209 | 1.595368182 |
| 1.172213776 | 0.297067339 | 2.137517868 |
| 0.86032066  | 0.213937949 | 1.126487648 |
| 1.065310568 | 0.427875899 | 1.870828526 |
| 0.636639782 | 0.307675085 | 1.308891459 |
| 0.789433329 | 0.275481743 | 1.336804517 |
| 0.926612482 | 0.537845308 | 1.692811224 |
| 1.064196292 | 0.460036506 | 1.781134155 |
| 0.724722391 | 0.164298752 |             |
| 0.726869716 | 0.467525172 |             |
| 0.869255742 | 0.502423639 |             |
| 0.61661491  | 0.344442917 |             |
| 0.740794302 | 0.172562491 |             |
| 1.310306684 | 0.285391812 |             |
| 0.840528481 | 0.186205252 |             |
| 0.934873514 | 0.106403001 |             |
| 0.944777243 | 0.414780562 |             |
| 0.996545859 | 0.14049019  |             |
| 0.789471395 | 0.241322007 |             |
| 0.638479598 |             |             |
| 0.695602029 |             |             |

0.998037694  
1.33703899  
1.117059922  
0.822734487  
0.921281653  
0.810210263  
1.188652269  
0.874176512  
0.80828381  
0.834640891  
0.773141036  
1.033892654  
0.947345914  
0.887012491  
0.534790416  
1.221723458  
1.009249813  
0.935433445  
1.378766831  
0.969445108  
0.797240681  
1.130314841  
1.099041307  
0.680135275  
0.715931868  
1.293151937  
1.856948283  
0.993355467  
0.800948778  
1.169677313  
0.747414442  
0.877986844  
0.775639467  
0.739563213  
1.017825356  
0.909257318  
0.829130868  
0.679615466  
1.148087086  
0.877192703  
0.819397574  
1.136115691  
1.04781987

1.056229339  
0.677444775  
1.264121246  
0.796005095  
1.067717252  
0.940204488  
1.038434808  
0.958915025  
1.049491034  
1.285839828  
0.838051976  
1.059335363  
1.122372356  
2.053389425  
1.367100163  
0.860599938  
0.893882808  
1.062046826  
1.232804452  
1.739305505  
1.249207612  
0.933316032  
1.483733178  
0.710720218  
0.758741854  
1.322795991  
1.113003638  
1.169910022  
1.163200644  
1.095063368  
1.03179304  
1.184666188  
1.090848096  
1.124839108  
0.835189997  
1.10205544  
1.024738887  
0.789827805  
0.756599222  
1.586100363  
0.992254394  
0.748248237  
1.471244758

1.181144269  
0.84242929  
0.97243381  
0.998632547  
1.286196892  
1.343348524  
1.08622322  
1.308996331  
1.018313284  
1.213533965  
1.543851471  
2.08919204  
1.291150154  
1.779853153  
1.097376557  
1.627915108  
2.559267483  
1.246658728  
2.356697322  
1.229581212  
1.500314068  
1.858648621
