# Supplementary material for: The O-GlcNAc transferase OGT is a conserved and essential regulator of the cellular and organismal response to hypertonic stress
Source: PubMed Central journal article supplement (PMC7556452; doi:10.1371/journal.pgen.1008821), 2020-10-02
Supplement: pgen.1008821.s038.pdf [file pgen.1008821.s038.pdf]

| zcls4 no DTT | zcls4 Dtt   | (dr50);zcls4 no-1(dr50);zcls4 Dtt |             |
|--------------|-------------|-----------------------------------|-------------|
| 1.135247819  | 10.16952401 | 1.054920557                       | 4.437989055 |
| 1.823962338  | 2.478004606 | 0.960917216                       | 0.775941456 |
| 1.009121984  | 13.92920838 | 0.971486425                       | 1.216712398 |
| 1.014764791  | 2.466727686 | 1.072509447                       | 1.029202735 |
| 0.76178355   | 4.110836748 | 0.997448262                       | 7.717430191 |
| 1.072325605  | 3.723420157 | 0.9808968                         | 9.717297426 |
| 0.451962663  | 1.930253656 | 0.927405228                       | 1.008905072 |
| 0.855500755  | 2.248436028 | 0.815557361                       | 1.31790211  |
| 0.984632944  | 2.024449953 | 1.053869577                       | 2.847559685 |
| 0.905643815  | 2.054730187 | 0.586075094                       | 1.252708596 |
| 0.749622254  | 2.466909063 | 1.057072828                       | 1.088860441 |
| 1.047971724  | 3.196412996 | 0.859207721                       | 9.863803925 |
| 1.181241995  | 2.064704605 | 0.979130319                       | 1.353527548 |
| 0.954316852  | 2.131770191 | 1.255635006                       | 6.277080316 |
| 0.790544013  | 3.192494323 | 1.27390828                        | 9.690125464 |
| 1.055080059  | 2.61400206  | 0.93154543                        | 2.330577235 |
| 1.653368897  | 1.934313441 | 1.158219324                       | 9.804657261 |
| 0.942420271  | 2.111122782 | 1.072904988                       | 5.969593453 |
| 0.862265721  | 2.424267921 | 0.736815594                       | 0.998641667 |
| 1.078883694  | 2.600738744 | 0.73995098                        | 13.03007708 |
| 1.08417234   | 2.115150361 | 0.811285571                       | 7.786682981 |
| 1.021459767  | 1.932243224 | 1.000437139                       | 8.492721868 |
| 0.870752588  | 15.01943556 | 0.769853761                       | 12.19374535 |
| 1.08951309   | 2.085179114 | 0.916053351                       | 8.166583838 |
| 0.988942651  | 3.051274328 | 1.116054428                       | 4.661346207 |
| 0.839741656  | 1.950289755 | 1.260061451                       | 1.392151956 |
| 1.041279653  | 1.877314863 | 0.766028547                       | 11.44729511 |
| 1.043339554  | 3.320751642 | 0.900643257                       | 7.741959285 |
| 1.04540762   | 2.185570437 | 0.915891168                       | 1.967329986 |
| 0.828673093  | 3.321442376 | 0.881492593                       | 1.117780978 |
| 1.101449987  | 4.078216535 | 1.013926999                       | 12.81841873 |
| 1.000774468  | 2.158118302 | 1.184257527                       | 4.289130037 |
| 1.154586112  | 1.814737701 | 0.870625316                       | 13.62942381 |
| 1.158053338  | 2.458324438 | 0.854628835                       | 1.850200121 |
| 0.923327599  | 3.507869268 | 1.063538106                       | 3.464095544 |
| 0.929869394  | 2.115150361 | 0.970805965                       | 2.02035731  |
| 0.723231751  | 2.314440236 | 0.956166723                       | 15.57025466 |
| 1.000774468  | 2.279679805 | 0.900877268                       | 8.044718703 |
| 0.949010271  | 2.251742552 | 0.843374463                       | 11.70297073 |
| 0.984518233  | 3.517144884 | 1.386486221                       | 1.176103422 |
| 0.986521322  | 23.78326299 | 1.039864666                       | 16.33787369 |
| 1.124980454  | 1.659821068 | 0.906121024                       | 15.11655116 |

|             |             |             |             |
|-------------|-------------|-------------|-------------|
| 0.747258566 | 3.060779855 | 0.889949943 | 14.76002079 |
| 0.800210259 | 2.372027945 | 0.75628981  | 1.458388149 |
| 0.940338753 | 1.746219379 | 1.049628653 | 6.487402994 |
| 0.907368851 | 2.024351391 | 1.00071231  | 1.669172312 |
| 1.035889361 | 1.615775537 | 0.989295558 | 1.380067304 |
| 0.861203648 | 2.166132535 | 1.188574711 | 1.053570268 |
| 1.039106409 | 1.453386036 | 0.897875113 |             |
| 1.08104492  | 1.875467112 | 0.720035115 |             |
| 0.835547335 | 2.328117446 | 0.866319621 |             |
| 0.928315456 | 14.77112082 | 0.847203314 |             |
| 0.950155738 | 2.451359395 | 1.071700617 |             |
| 1.004997145 | 2.005617124 | 1.09325625  |             |
| 1.022943522 | 1.605015656 | 1.684493915 |             |
| 0.897318879 | 2.450649943 | 0.874833819 |             |
| 0.900167511 | 1.522917668 | 0.77405989  |             |
| 1.026190962 | 2.070385274 | 0.957389864 |             |
| 0.703619801 | 2.996637184 | 1.18437342  |             |
| 0.847952067 | 2.482026863 | 0.736035895 |             |
| 1.030553091 | 1.788446016 | 1.022272077 |             |
| 0.892553674 | 2.360465433 | 0.86190077  |             |
| 1.168286074 | 1.896045603 | 0.964508004 |             |
| 0.949232435 | 1.796421249 | 0.946331865 |             |
| 0.876214555 | 2.047038684 | 0.989936198 |             |
| 0.844234772 | 1.885115341 | 0.977836632 |             |
| 0.809274921 | 2.05763954  | 1.126301779 |             |
| 0.905152151 | 16.36592594 | 0.840650134 |             |
| 1.108349573 | 2.149512902 | 0.945731401 |             |
| 0.998598871 | 1.957679369 | 0.979173717 |             |
| 0.968986451 | 22.16597861 | 0.982964067 |             |
| 0.913083386 | 4.975995612 | 0.769276226 |             |
| 1.070364745 | 6.793653297 | 1.027026831 |             |
| 0.959813566 | 1.734351869 | 0.941441261 |             |
| 1.09276149  | 2.378740528 | 0.646065318 |             |
| 1.281168643 | 2.199978355 | 0.842074965 |             |
| 0.759516337 | 2.471186115 | 0.951273546 |             |
| 0.836401454 | 1.947010817 | 0.952517041 |             |
| 0.894428187 | 1.770155995 | 0.934533765 |             |
| 0.879332173 | 1.973176463 | 0.782400361 |             |
| 0.86215368  | 6.561391646 | 0.935761799 |             |
| 0.938789562 | 1.812878339 | 0.892237994 |             |
| 0.866054828 | 2.291171346 | 0.699136998 |             |
| 0.771572152 | 2.820117182 | 0.814826972 |             |
| 1.180663394 | 15.16892032 | 0.771808612 |             |

|             |             |             |
|-------------|-------------|-------------|
| 0.799014667 | 2.453309196 | 0.892765911 |
| 0.956015059 | 3.3578617   | 0.873980376 |
| 0.88100399  | 2.475460654 | 1.063330545 |
| 1.018049056 | 2.585039349 | 0.998185666 |
| 1.234826561 | 2.054221276 | 1.091921383 |
| 1.632477195 | 2.05763954  | 0.754908611 |
| 0.866411229 | 1.733825829 | 0.816039797 |
| 1.202552865 | 2.556891992 | 0.888043308 |
| 0.631579246 | 1.747928008 | 0.723179373 |
| 0.812983454 | 13.47966225 | 1.013926999 |
| 0.734524084 | 9.340561697 | 0.780479889 |
| 1.096980219 | 3.956550221 | 0.928186859 |
| 1.077035125 | 2.074776335 | 0.905095839 |
| 0.958488222 | 2.132198343 | 7.918214213 |
| 0.800619574 | 3.968218331 | 1.842933772 |
| 0.780604085 | 9.208156828 | 0.879792906 |
| 0.841640718 | 3.83996222  | 0.025957379 |
| 1.342617336 | 3.508965477 | 0.85793823  |
| 1.042031366 | 4.359919965 | 0.768421475 |
| 0.744074634 | 6.268008508 | 0.996341273 |
| 0.906026589 | 14.22827271 | 1.087325754 |
| 1.087231907 | 1.917668994 | 0.411083878 |
| 0.889049052 | 8.637453482 | 0.487979599 |
| 0.949666033 | 23.96220556 |             |
| 0.929460373 | 3.79460319  |             |
| 1.203569294 | 2.195247219 |             |
| 0.856778141 | 1.896372001 |             |
| 0.958775539 | 2.873537412 |             |
| 1.027365094 | 3.552199484 |             |
| 0.824880773 | 3.167968832 |             |
| 0.824880773 | 4.627581138 |             |
| 0.88782298  | 2.695592527 |             |
| 1.095623081 | 1.763559885 |             |
| 0.895429787 | 3.351078141 |             |
| 0.959075531 | 15.67002127 |             |
| 1.045034763 | 2.423527913 |             |
| 0.945175886 | 2.549657022 |             |
| 0.906525571 | 3.654236348 |             |
| 0.994550746 | 2.381843233 |             |
| 0.854932962 | 2.249336844 |             |
| 0.816288265 | 4.995144654 |             |
| 0.84739907  | 44.67871959 |             |
| 1.434575258 | 1.986567281 |             |

0.786606087 16.02073127  
1.61057971  
1.575716041  
0.867785646  
1.530043112  
1.496421903  
1.335268775  
1.23014706  
0.937364515  
1.127944704  
1.088464025  
1.561943202  
0.608518603  
1.752102165  
2.075401268  
0.662102905  
0.840156343  
0.711577283
