# Supplementary material for: The O-GlcNAc transferase OGT is a conserved and essential regulator of the cellular and organismal response to hypertonic stress
Source: PubMed Central journal article supplement (PMC7556452; doi:10.1371/journal.pgen.1008821), 2020-10-02
Supplement: pgen.1008821.s039.pdf [file pgen.1008821.s039.pdf]

| drls4           |                    | frls7           |                    |
|-----------------|--------------------|-----------------|--------------------|
| <i>ev(RNAi)</i> | <i>ogt-1(RNAi)</i> | <i>ev(RNAi)</i> | <i>ogt-1(RNAi)</i> |
| 4.277312621     | 0.889041153        | 0.766102825     | 4.063554451        |
| 4.069411746     | 1.420946116        | 1.544562148     | 2.692059286        |
| 5.637443913     | 0.956601224        | 1.149154238     | 0.920738729        |
| 2.450352731     | 1.125744306        | 0.851225362     | 0.823275166        |
| 4.484035848     | 1.281571018        | 0.909747105     | 1.408944381        |
| 4.207670002     | 1.178039266        | 1.625066599     | 2.179191271        |
| 2.479199546     | 1.065682919        | 0.840844565     | 0.872588622        |
| 3.940516351     | 1.336951566        | 1.044685671     | 1.603710222        |
| 3.705600953     | 1.304456215        | 1.419931961     | 0.908769126        |
| 3.972423366     | 1.027961978        | 0.685275463     | 1.024927586        |
| 4.072970682     | 1.051869203        | 1.266540961     | 1.246311944        |
| 4.479258821     | 1.133584954        | 0.919323391     | 1.133675771        |
| 5.313726595     | 0.969630636        | 1.079508527     | 0.912277887        |
| 3.354763921     | 1.477933121        | 1.266017381     | 2.161144713        |
| 3.959103693     | 1.420669031        | 0.985794077     | 1.153992541        |
| 5.204307452     | 1.224123134        | 0.970746731     | 1.483704695        |
| 3.659922308     | 1.159516636        | 0.935358101     | 1.115844027        |
| 5.211408075     | 1.221042008        | 0.649521961     | 1.298241608        |
| 4.965791766     | 0.93194795         | 0.61090096      | 1.298241608        |
| 2.131095578     | 1.11313597         | 1.070290712     | 0.712760099        |
| 3.25267474      | 1.254558983        | 0.957628532     | 0.809049118        |
| 3.392891722     | 1.138044105        | 1.064031702     | 0.810102764        |
| 6.556203929     | 1.166337322        | 0.978446543     | 1.357793976        |
| 4.433080895     | 1.125075547        | 0.864954803     | 1.517425257        |
| 6.254424209     | 1.194921724        | 0.78494142      | 0.906708425        |
| 4.556222031     | 1.079549971        | 0.718221399     | 0.713023889        |
| 4.474511558     | 1.396319329        | 1.169053013     | 1.157468422        |
| 5.715377022     | 1.178777709        | 1.316739231     | 0.846045093        |
| 4.794294894     | 1.458746735        | 0.864954803     | 1.347231858        |
| 3.643362659     | 1.29385088         | 1.36804076      | 1.117930274        |
| 6.104570413     | 1.201225867        | 0.757684113     | 2.131075848        |
| 4.003313425     | 1.176128622        | 1.028563979     | 0.896966929        |
| 2.674558609     | 1.546022181        | 1.395401575     | 1.171583891        |
| 4.083209144     | 0.88738518         | 0.337085243     | 0.865494406        |
| 4.196394036     | 1.147181352        | 1.363403333     | 1.143689036        |
| 4.186798623     | 1.27264021         | 1.197035665     | 0.723610077        |
| 2.884457969     | 1.039047375        | 1.461643549     | 0.865494406        |
| 5.599681131     | 0.973020953        | 1.033630796     | 1.591392939        |
| 3.904952124     | 1.114126305        | 1.523499937     | 1.382543012        |
| 5.014353746     | 1.183745341        | 0.605846622     | 3.977152864        |
| 5.176756775     | 1.284028489        | 1.102723764     | 0.920272533        |

|             |             |             |             |
|-------------|-------------|-------------|-------------|
| 3.870977827 | 1.127603334 | 1.171467913 | 0.998647391 |
| 4.0701386   | 1.079983004 | 4.266901813 | 0.700638328 |
| 4.883725052 | 1.172844413 | 0.851225362 | 1.048579761 |
| 3.389395183 | 1.36822963  | 1.407127639 | 1.122208848 |
| 4.49015919  | 0.983651645 | 0.922805676 | 3.806708445 |
| 2.482895883 | 1.220168275 | 0.644385554 | 1.298241608 |
| 3.489872194 | 1.019420795 | 0.903829176 | 1.116766975 |
| 3.17972359  | 0.891301044 | 0.909747105 | 0.944175715 |
| 3.77232358  | 1.104301558 | 0.914749642 | 1.217101508 |
| 4.943556877 | 0.974383727 | 0.843625135 | 0.971203646 |
| 4.845226738 | 1.038373107 | 1.099499425 | 1.180219644 |
| 4.381231996 | 0.969431941 | 1.498896832 | 2.865084929 |
| 5.099491749 | 1.055988365 | 0.685709319 | 1.353880534 |
| 4.752745232 | 1.023787264 | 1.074412499 | 1.017821421 |
| 4.271877954 | 1.004635352 | 0.995933673 | 1.892763466 |
| 2.223318859 | 1.267186038 | 0.881844979 | 1.20932095  |
| 5.030446406 | 1.184187202 | 1.009392236 | 1.324206441 |
| 4.628543016 | 1.256143022 | 1.234276774 | 0.877684468 |
| 2.798871427 | 1.349885039 | 1.312305766 | 5.808429122 |
| 4.066814952 | 1.326269864 | 1.307238948 | 1.162604425 |
| 4.499643671 | 1.155664421 | 1.036122674 | 0.933822911 |
| 2.344216526 | 0.802742286 | 1.006321508 | 1.259679976 |
| 4.645917426 | 1.186128493 | 1.5808471   | 1.123478315 |
| 5.460429801 | 1.226251406 | 0.823766479 | 4.874100074 |
| 2.67392181  | 0.951531589 | 1.142434038 | 0.710358616 |
| 2.163000823 | 1.07193985  | 1.035274088 | 0.858986929 |
| 3.551765859 | 0.979147381 | 1.582168879 | 0.643376372 |
| 3.400475707 | 1.15265559  | 0.502996805 | 1.04368443  |
| 3.232965073 | 1.226251406 | 0.905864827 | 1.01754072  |
| 6.008204876 | 1.053503686 | 1.276838042 | 0.798917913 |
| 3.643628133 | 1.365652926 | 1.157134476 | 1.369054787 |
| 4.723342144 | 1.201890998 | 1.205902596 | 3.491822257 |
| 2.506663543 | 0.952561344 | 1.047406207 | 2.050725598 |
| 3.608683395 | 1.034437582 | 0.985794077 | 8.129176426 |
| 7.644222826 | 1.125075547 | 0.93174668  | 0.649120804 |
| 4.935801409 | 0.980209939 | 0.740566065 | 0.806674397 |
| 2.678020821 | 0.913362266 | 0.66043347  | 1.146195294 |
| 3.855955915 | 0.970758114 | 0.915067264 | 4.528013415 |
| 3.644977625 | 1.162858182 | 1.276838042 | 1.266577179 |
| 3.733120754 | 1.185869286 | 0.760022644 | 1.127420344 |
| 3.403173212 | 0.91540787  | 1.049455925 | 1.697142661 |
| 6.504979374 | 0.946370195 | 0.544533871 | 0.865494406 |
| 5.965001816 | 1.123506802 | 0.872775371 | 0.963474904 |

|             |             |             |             |
|-------------|-------------|-------------|-------------|
| 2.584468214 | 1.396407131 | 1.040386553 | 5.818904352 |
| 4.883902681 | 1.014577056 | 0.883964799 | 1.006799615 |
| 5.566761195 | 1.262761268 | 0.803935064 | 8.483559025 |
| 5.683437045 | 1.00744888  | 0.766102825 | 2.396753739 |
| 4.053102533 | 1.001400731 | 0.995933673 | 4.021620622 |
| 5.371470282 | 1.204113429 | 0.766102825 | 4.147160694 |
| 5.137635243 | 1.216542044 | 1.276838042 | 0.841452894 |
| 3.384802507 | 1.260153929 | 1.154787347 | 2.409536425 |
| 5.522808631 | 0.975801013 | 1.149154238 | 8.839712525 |
| 3.222118966 | 1.189689931 | 0.630337768 | 0.889535917 |
| 5.024158348 | 1.594335374 | 1.264069662 | 3.894724825 |
| 5.636563338 | 1.205333402 | 1.222995474 | 1.074406848 |
| 6.596424372 | 1.173831656 | 1.11029395  | 0.676548444 |
| 3.377585444 | 0.942107266 | 0.908935556 | 3.573982781 |
| 7.010453509 | 0.882168276 | 1.360840545 | 2.596483217 |
| 4.508583489 | 1.000845938 | 1.121793423 | 7.257639835 |
| 4.855279076 | 1.290683676 | 1.124833514 | 3.644186971 |
| 7.982307655 | 1.102357365 | 1.001826772 | 1.008046425 |
| 5.340699826 | 0.986822669 | 0.713527141 | 1.221874455 |
| 3.799783624 | 1.137964282 | 5.703209923 | 0.900114182 |
| 5.183294585 | 1.019068142 | 1.14383408  | 9.683355056 |
| 2.970090683 | 0.98040431  | 1.130315644 | 3.916362185 |
| 4.728619622 | 1.227723497 | 1.35921469  | 4.247227514 |
| 3.639504686 | 0.984063461 | 0.721037953 | 3.318982895 |
| 3.315800344 | 1.227723497 | 1.305857089 | 4.285252789 |
| 2.62002417  | 1.133460082 | 1.165808647 | 0.919587806 |
| 3.584193064 | 1.236279061 | 1.350099242 | 1.983140725 |
| 5.910774527 | 1.034758517 | 0.957628532 | 1.231665116 |
| 3.655347405 | 1.079908031 | 1.318701585 | 4.710762408 |
| 3.968266466 | 1.108419292 | 1.185635325 | 4.85429471  |
| 6.139368017 | 0.911048785 | 1.149154238 | 0.876313086 |
| 4.237913812 | 0.855191671 | 1.155758573 | 3.051341591 |
| 6.244202834 | 0.996901498 | 1.029093348 | 4.678568815 |
| 3.932272593 | 0.961408266 | 0.840367895 | 2.540037929 |
| 5.343578991 | 1.182431984 | 1.485975308 | 0.941225166 |
| 3.755464478 | 1.092102878 | 1.641648912 | 0.857091547 |
| 4.153517235 | 0.971785371 | 4.935470126 | 4.679708123 |
| 4.349437859 | 1.279208675 | 0.957628532 | 0.830874629 |
| 3.341860983 | 0.956601224 | 0.780289915 | 4.18322296  |
| 3.329056917 | 1.227723497 | 0.901297442 | 4.909713719 |
| 4.21246748  | 1.039851218 | 0.771077519 | 4.989320691 |
| 3.297332897 | 1.204113429 | 1.042125167 | 6.075770727 |
| 3.958427789 | 1.118105327 | 0.943335569 | 0.699053174 |

|             |             |             |             |
|-------------|-------------|-------------|-------------|
| 4.293675836 | 1.278878642 | 1.34475496  | 3.917907711 |
| 5.556835932 | 1.320968319 | 7.394346891 | 5.159245872 |
| 3.997040151 | 0.849722115 | 0.796230465 | 6.086380014 |
| 3.484965328 | 0.993871402 | 1.185635325 | 1.808786061 |
| 3.621798117 | 1.066755305 | 0.766102825 | 3.864057701 |
| 5.181692206 | 1.240601715 | 0.659699655 | 6.040797688 |
| 3.770247126 | 1.183842159 | 0.870571393 | 5.802746583 |
| 3.96454389  | 1.059945955 | 0.877080338 | 4.956922505 |
| 3.628396244 | 1.185121104 | 0.919323391 | 0.927315435 |
| 4.067629782 | 1.251057423 | 0.754495207 | 4.321289925 |
| 4.096304207 | 1.097177032 | 1.485975308 | 4.268461046 |
| 6.612052861 | 0.909424812 | 1.200608906 | 5.352399614 |
| 4.336182952 | 0.878541615 | 1.072543956 | 8.463536639 |
| 3.127545745 | 1.149433882 | 0.957628532 | 4.057005026 |
| 4.100776586 | 1.063312199 | 0.957628532 | 5.855156784 |
| 5.520827596 | 1.142589385 | 2.41927208  | 2.88233458  |
| 4.152196982 | 1.048024651 | 0.790043539 | 4.447679584 |
| 4.513682366 | 0.91717393  | 0.897019131 | 2.737596435 |
| 5.309078916 | 0.885074828 | 0.904426947 | 3.516496955 |
| 4.92953923  | 0.89843342  | 0.725194422 | 3.404822331 |
| 7.979545611 | 0.993871402 | 1.316739231 | 5.261294939 |
| 4.515684887 | 1.065093457 | 0.794130978 | 3.071109181 |
| 4.539075797 | 0.701556284 | 1.006321508 | 6.104314847 |
| 4.619915722 | 1.019068142 | 0.731671238 | 4.529203807 |
| 4.207080693 | 0.783898571 | 0.744822191 | 6.026699577 |
| 6.592786972 | 0.826395834 | 0.710498588 | 2.332026593 |
| 4.306039361 | 0.997184307 | 1.068124132 | 7.78944965  |
| 5.431522538 | 0.971283416 | 1.197035665 | 6.690208581 |
| 4.761457258 | 1.057667201 | 1.860535433 | 5.717256314 |
| 3.402299484 | 1.467513242 | 0.700703804 | 5.304643131 |
| 3.734326542 | 0.77301109  | 1.255906271 | 4.763795654 |
| 3.979300961 | 1.086129507 | 1.399610931 | 6.272692128 |
| 5.910774527 | 0.978674592 | 1.159944419 | 4.691890725 |
| 3.885568912 | 2.029154112 | 4.300294162 | 9.866636224 |
| 4.082261544 | 0.895990128 | 0.718221399 | 4.609260904 |
| 3.739469599 | 0.99103986  | 1.054779252 | 5.211646169 |
| 3.425836665 | 1.519366626 | 1.347773489 | 3.599085647 |
| 3.808488742 | 0.749586512 | 0.870571393 | 5.484706121 |
| 5.803305899 | 1.520985384 | 0.845697924 | 5.413943729 |
| 5.197089677 | 0.661414419 | 0.712082754 | 3.573982781 |
| 2.987627852 | 1.303437904 | 1.097769293 | 4.828973459 |
| 2.336817836 | 1.024929883 | 0.912027173 | 5.460645116 |
| 3.659050898 | 1.209930402 | 1.154787347 | 3.978783634 |

|             |             |             |             |
|-------------|-------------|-------------|-------------|
| 3.661541742 | 0.446570596 | 0.748491266 | 4.841359331 |
| 5.554089857 | 0.85814447  | 0.882520412 | 3.955108156 |
| 3.070532222 | 0.650825466 | 1.316739231 | 5.292831173 |
| 4.359530533 |             | 1.165808647 | 7.181762089 |
| 3.228192242 |             | 0.957628532 | 7.23132709  |
| 3.64899856  |             | 0.990650205 | 5.027872125 |
| 6.445906377 |             | 0.972828985 | 5.52920167  |
| 3.931601156 |             | 0.722146106 | 7.956196279 |
| 3.058183342 |             | 1.064031702 | 2.967409391 |
| 4.728619622 |             | 1.01625885  | 14.48564321 |
| 4.766148349 |             | 0.925707581 | 5.088058021 |
| 3.646705922 |             | 1.006321508 | 9.429333787 |
| 2.551645834 |             | 0.679607345 | 24.66659056 |
| 1.91126841  |             | 0.972828985 | 2.959990867 |
| 3.089170226 |             | 0.849217755 | 7.052176638 |
| 3.17229642  |             | 0.825033812 | 7.70290021  |
| 6.09664794  |             | 0.807999074 | 6.715042802 |
| 2.72956033  |             | 0.770774184 | 7.547916328 |
| 3.450614318 |             | 1.172022979 | 4.81370484  |
| 3.208706172 |             | 0.976781102 | 6.95379988  |
| 5.153363721 |             | 1.004725017 | 3.0941425   |
| 3.673257356 |             | 0.863214451 | 6.191613825 |
| 4.426898077 |             | 0.809263548 | 5.374116426 |
| 0.756438407 |             | 0.735149176 | 8.160375824 |
| 1.426738679 |             | 1.404521847 | 5.810163264 |
| 5.069383135 |             | 0.974429032 | 4.363162519 |
| 1.555466981 |             | 26.12084634 | 4.793507477 |
| 2.835977677 |             | 0.722738515 | 4.956922505 |
| 1.370225004 |             | 0.589309866 | 7.810221516 |
| 4.252228839 |             | 0.978003607 | 6.750856364 |
| 3.456907526 |             | 0.976781102 | 5.243877869 |
| 4.601676813 |             | 2.058186695 | 3.437936111 |
| 1.709488711 |             | 0.678825288 | 5.977949732 |
| 6.133822622 |             | 4.929705138 | 7.587500956 |
| 1.394050596 |             | 0.844011587 | 5.726490382 |
| 3.399806401 |             | 0.97503996  | 5.321187827 |
| 4.095046404 |             | 0.986647578 | 8.425323091 |
| 1.703104525 |             | 0.772281074 | 3.617766615 |
| 8.607924068 |             | 0.866425815 | 7.820360165 |
|             |             | 0.721330582 |             |
|             |             | 0.957628532 |             |
|             |             | 1.266017381 |             |
|             |             | 1.585040329 |             |

1.231236684  
0.736637332  
1.044685671  
0.618468427  
0.585217436  
0.845697924  
1.828199924  
0.688631753  
0.780289915  
0.700703804  
0.766102825  
1.276838042  
0.994460398  
1.120244698  
9.786496459  
1.20963604  
0.595031321  
1.354694021  
0.957628532  
0.646710177  
1.42276239  
3.412639859  
0.859911335  
0.732304171  
0.655909953  
1.340679945  
1.077332098  
0.844011587  
0.940217104  
1.021470434  
1.330941349  
1.197035665  
0.739985684  
0.745942225  
0.985794077  
1.00322989  
1.362779065  
0.743570389  
0.874356486  
1.249080694  
0.661017925  
1.735701714  
2.340869744

0.753543763  
1.824054346  
0.734181874  
1.56057983  
3.075201482  
0.980985325  
1.993430821  
0.820824456  
4.015861585  
0.90722703  
1.17527138  
0.831624778  
1.444843048  
5.453613334  
0.97332736  
1.723731357  
17.23731357  
1.454176659  
6.824479192  
0.696457114  
1.915257064  
0.868959223  
0.810301065  
0.940828031  
6.478075362  
1.144179545  
2.698771317  
16.16162125  
4.305728286  
9.132506243  
0.616404572  
0.446413301  
7.531180318  
5.366709897  
4.259303022  
6.36454655  
4.259303022  
1.297432204  
6.396235854  
0.74194643  
6.027426641  
1.031292265  
2.944707735

4.095703567  
7.49002316  
9.659557364  
10.10830117  
0.749448416  
0.993096255  
9.427044508  
6.52485881  
1.053391385  
1.154401518  
8.485316105  
0.658369616  
6.303377678  
9.547699392  
0.702260923  
0.68402038  
0.876473571  
1.033230784  
6.296407597  
10.33078053  
5.918144327  
6.874764828  
7.011506294  
4.964792582
