# Supplementary material for: The O-GlcNAc transferase OGT is a conserved and essential regulator of the cellular and organismal response to hypertonic stress
Source: PubMed Central journal article supplement (PMC7556452; doi:10.1371/journal.pgen.1008821), 2020-10-02
Supplement: pgen.1008821.s040.pdf [file pgen.1008821.s040.pdf]

*gpdh-1* mRNA

|             | 50mM NaCl   |             |             | 250mM NaCl  |             |             |
|-------------|-------------|-------------|-------------|-------------|-------------|-------------|
| WT          | 0.850667161 | 1.122462048 | 1.047294123 | 17.95939277 | 15.63455949 | 20.62992494 |
| ogt-1(dr20) | 0.890898718 | 0.831237896 | 1.350349946 | 92.6252312  | 114.0350359 | 130.9918582 |
