# Supplementary material for: The O-GlcNAc transferase OGT is a conserved and essential regulator of the cellular and organismal response to hypertonic stress
Source: PubMed Central journal article supplement (PMC7556452; doi:10.1371/journal.pgen.1008821), 2020-10-02
Supplement: pgen.1008821.s041.pdf [file pgen.1008821.s041.pdf]

*gpdh-1* mRNA

|                        | 50mM NaCl   |             |             | 250mM NaCl  |             |             |
|------------------------|-------------|-------------|-------------|-------------|-------------|-------------|
| <i>gpdh-1</i> (dr81)   | 1.021012126 | 0.888842681 | 1.101905116 | 38.58585049 | 45.88656794 | 37.53071838 |
| <i>gpdh-1</i> (dr81);o | 1.040059934 | 0.983956654 | 0.977159968 | 71.83757109 | 76.46176865 | 137.8224087 |
