# Supplementary material for: The O-GlcNAc transferase OGT is a conserved and essential regulator of the cellular and organismal response to hypertonic stress
Source: PubMed Central journal article supplement (PMC7556452; doi:10.1371/journal.pgen.1008821), 2020-10-02
Supplement: pgen.1008821.s042.pdf [file pgen.1008821.s042.pdf]

*gfp* mRNA

|                | 50mM NaCl   |             |             | 250mM NaCl  |             |             |
|----------------|-------------|-------------|-------------|-------------|-------------|-------------|
| gpdh-1(dr81)   | 1.023373892 | 0.848703971 | 1.15135548  | 36.08514967 | 29.92611993 | 34.855957   |
| gpdh-1(dr81);o | 0.810377861 | 0.766664172 | 1.609560345 | 63.41123925 | 51.50593104 | 117.5121946 |
