# Supplementary material for: The O-GlcNAc transferase OGT is a conserved and essential regulator of the cellular and organismal response to hypertonic stress
Source: PubMed Central journal article supplement (PMC7556452; doi:10.1371/journal.pgen.1008821), 2020-10-02
Supplement: pgen.1008821.s043.pdf [file pgen.1008821.s043.pdf]

| Concentration | WT  |     |       | ogt-1(dr15) |     |     |     |     | ogt-1(dr20) |     |     |     |     |     |     |     |
|---------------|-----|-----|-------|-------------|-----|-----|-----|-----|-------------|-----|-----|-----|-----|-----|-----|-----|
| 50            | 100 | 100 | 100   | 100         | 100 | 100 | 95  | 100 | 100         | 100 | 100 | 100 | 100 | 100 | 100 |     |
| 200           | 100 | 100 | 100   | 100         | 100 | 100 | 95  | 95  | 100         | 100 | 100 | 100 | 100 | 100 | 100 |     |
| 300           | 100 | 100 | 100   | 100         | 100 | 100 | 100 | 95  | 100         | 100 | 100 | 100 | 100 | 90  | 95  | 100 |
| 400           | 100 | 100 | 100   | 100         | 100 | 100 | 95  | 100 | 95          | 100 | 90  | 95  | 100 | 100 | 90  | 95  |
| 500           | 70  | 80  | 88.24 | 90          | 85  |     | 85  | 85  | 95          | 100 | 65  | 90  | 70  | 65  | 65  | 75  |
| 600           | 0   | 0   | 5     | 0           | 0   |     | 10  | 5   | 0           | 5   | 0   | 55  | 0   | 5   | 5   | 10  |
