# Supplementary material for: The O-GlcNAc transferase OGT is a conserved and essential regulator of the cellular and organismal response to hypertonic stress
Source: PubMed Central journal article supplement (PMC7556452; doi:10.1371/journal.pgen.1008821), 2020-10-02
Supplement: pgen.1008821.s044.pdf [file pgen.1008821.s044.pdf]

WT (drls4)  
ogt-1(dr20)

| 50 mM NaCl |     |     |     |     |     |     |     |     |     |
|------------|-----|-----|-----|-----|-----|-----|-----|-----|-----|
| 100        | 100 | 100 | 100 | 100 | 100 | 100 | 100 | 100 | 100 |
| 100        | 100 | 100 | 100 | 100 | 100 | 100 | 100 | 100 | 100 |

| 250 mM NaCl |            |     |            |
|-------------|------------|-----|------------|
| 42.8571429  | 100        | 100 | 100        |
| 0           | 23.9130435 |     | 6.52173913 |

|      |            |     |     |     |   |
|------|------------|-----|-----|-----|---|
| aCl  |            |     |     |     |   |
| 100  | 16.6666667 | 100 | 100 | 100 | 0 |
| 6.25 | 0          | 0   | 0   |     | 0 |
