# Supplementary material for: The O-GlcNAc transferase OGT is a conserved and essential regulator of the cellular and organismal response to hypertonic stress
Source: PubMed Central journal article supplement (PMC7556452; doi:10.1371/journal.pgen.1008821), 2020-10-02
Supplement: pgen.1008821.s045.pdf [file pgen.1008821.s045.pdf]

N2

ogt-1(dr20);drls4

ogt-1(dr20 dr36);drls4

gpdh-1(dr81)

ogt-1(dr84)

| Unadapted |   |   |   |   | Adapted |             |    |    |    |
|-----------|---|---|---|---|---------|-------------|----|----|----|
| 0         | 0 | 0 | 0 | 0 | 35      | 55          | 70 | 30 | 75 |
| 0         | 0 | 0 | 0 | 0 | 20      | 10          | 0  | 0  | 0  |
| 0         | 0 | 0 | 0 | 0 | 10      | 40          | 60 | 35 | 55 |
| 0         | 0 | 0 | 0 | 0 | 35      | 50          | 10 | 45 | 75 |
| 0         | 0 | 0 | 0 | 0 | 45      | 31.57894737 | 75 | 80 | 70 |
