# Supplementary material for: The O-GlcNAc transferase OGT is a conserved and essential regulator of the cellular and organismal response to hypertonic stress
Source: PubMed Central journal article supplement (PMC7556452; doi:10.1371/journal.pgen.1008821), 2020-10-02
Supplement: pgen.1008821.s046.pdf [file pgen.1008821.s046.pdf]

osm-11(n1604)lr52);osm-11(n1604)

|             |             |
|-------------|-------------|
| 0.933582723 | 0.078637656 |
| 1.715458253 | 0.212315286 |
| 0.511832633 | 0.282078185 |
| 0.653459049 | 0.227430863 |
| 0.7182882   | 0.238562162 |
| 0.625047786 | 0.197688066 |
| 2.126330786 | 0.174292706 |
| 1.074848529 | 0.166004905 |
| 0.698651544 | 0.116524397 |
| 1.081134193 | 0.337632828 |
| 0.802455409 | 0.265692761 |
| 0.682674066 | 0.171539878 |
| 1.302007239 | 0.238501086 |
| 1.190601448 | 0.159934715 |
| 0.992167873 | 0.29987759  |
| 1.314622432 | 0.264632905 |
| 0.885528618 | 0.253040725 |
| 2.168890782 | 0.231953998 |
| 1.161101806 | 0.217723691 |
| 1.717053625 | 0.209745636 |
| 1.074848529 | 0.245220098 |
| 0.69142303  | 0.145409318 |
| 0.902872765 | 0.344135386 |
| 0.664232237 | 0.260708626 |
| 0.667984962 | 0.158668979 |
| 1.299443744 | 0.260244731 |
| 0.901718565 | 0.195894911 |
| 1.035332039 | 0.164605574 |
| 1.444327711 | 0.237074098 |
| 0.975325517 | 0.518733486 |
| 1.239543062 | 0.135767698 |
| 0.710280022 | 0.232064981 |
| 0.931535392 | 0.340460573 |
| 1.139339441 | 0.18672941  |
| 0.96869065  | 0.254323026 |
| 0.86313594  | 0.187030101 |
| 0.933251717 | 0.198851815 |
| 1.192640149 | 0.152662582 |
| 0.74841305  | 0.225646807 |
| 0.687903059 | 0.16839365  |
| 0.642748618 | 0.32033879  |
| 0.870997946 | 0.237965958 |

|             |             |
|-------------|-------------|
| 0.911992691 | 0.250344389 |
| 0.680479644 | 0.228813421 |
| 0.617636841 | 0.176479685 |
| 0.857068762 | 0.1878992   |
| 1.170197996 | 0.252333907 |
| 0.562714818 | 0.175886952 |
| 1.148976014 | 0.118452397 |
| 1.029248895 | 0.266193832 |
| 1.11917218  | 0.210408864 |
| 1.057512263 | 0.244200874 |
| 1.249511415 | 0.159860188 |
| 0.921298739 | 0.348585412 |
| 1.156139594 | 0.183504732 |
| 1.380766957 | 0.170825327 |
| 0.533768317 | 0.139744242 |
| 1.926615288 | 0.228633253 |
| 0.806136397 | 0.216165443 |
| 1.029686826 | 0.170775339 |
| 0.454466157 | 0.204564173 |
| 0.575811712 | 0.106360524 |
| 1.777082902 | 0.238003469 |
| 0.984114562 | 0.172598766 |
| 0.806136397 | 0.221779857 |
| 0.964418886 | 0.156832533 |
| 0.92659356  | 0.137220156 |
| 0.489152624 | 0.170702076 |
| 1.135832843 | 0.115481673 |
| 0.98159683  | 0.151746815 |
| 1.061412923 | 0.098235762 |
| 0.864236317 | 0.152903756 |
| 0.740994062 | 0.180671078 |
| 0.98465145  | 0.12104329  |
| 0.790329801 | 0.180147014 |
| 1.143875499 | 0.183405487 |
| 0.81739978  | 0.218654485 |
| 0.877427371 | 0.137874754 |
| 1.701843505 | 0.174969628 |
| 0.711053642 | 0.187262725 |
| 0.58220962  | 0.178050179 |
| 1.144757377 | 0.143846399 |
| 0.483681838 | 0.197067057 |
| 1.130684816 | 0.108056865 |
| 1.030524879 | 0.192039836 |

|             |             |
|-------------|-------------|
| 1.24503288  | 0.230148908 |
| 0.737819753 | 0.223093086 |
| 1.084035269 | 0.204481853 |
| 1.20492574  | 0.155936347 |
| 0.931152202 | 0.19010004  |
| 1.26816661  | 0.213705869 |
| 0.445000983 | 0.136321236 |
| 0.80851438  | 0.190581305 |
| 1.794303593 | 0.211906026 |
| 0.777198167 | 0.212124736 |
| 1.428223388 | 0.223688001 |
| 1.030063174 | 0.190018364 |
| 1.187332678 | 0.227679661 |
| 1.1797118   | 0.222664691 |
| 0.986099568 | 0.143635274 |
| 1.261778708 | 0.19244413  |
| 0.903633719 | 0.201641828 |
| 0.376196985 | 0.239665715 |
| 0.892327081 | 0.231629587 |
| 1.288237575 | 0.214040516 |
| 0.783103928 | 0.205790836 |
| 1.460392023 | 0.188011028 |
| 0.909956993 | 0.196648792 |
| 1.265014038 | 0.241761778 |
| 0.418397414 | 0.199152422 |
| 1.018277554 | 0.353662624 |
| 0.838618083 | 0.240555163 |
| 0.946508406 | 0.149364317 |
| 2.342618589 | 0.131149156 |
| 0.618037904 | 0.20983865  |
| 0.637974611 | 0.183608819 |
| 0.97161449  | 0.175209378 |
| 1.027528154 | 0.145985034 |
| 0.466294583 | 0.26327785  |
| 1.253989951 | 0.194019628 |
| 0.704211105 | 0.330619934 |
| 1.176010744 | 0.264842997 |
| 1.863833088 | 0.36754966  |
| 0.659031215 | 0.13101601  |
| 1.33360836  | 0.19026716  |
| 1.732402924 | 0.305084562 |
| 1.074848529 | 0.173693762 |
| 1.093595887 | 0.280215873 |

1.521324072 0.166201749  
0.758716609 0.150447788  
0.721913191 0.332244529  
1.074848529 0.278344797  
0.569037457 0.286201304  
1.401141833 0.235248799  
1.048844129 0.210233083  
1.074848529 0.334967845  
2.525894044 0.190800869  
1.184323842 0.174116118  
0.831216196 0.159041442  
0.638011694 0.292002293  
1.356117303 0.257942805  
0.872809332 0.20983865  
0.615924438 0.210140142  
0.635952046 0.280215873  
2.222568145 0.187657719  
1.400131637 0.161592069  
1.036461082 0.283006074  
0.570823513 0.134427885  
0.77896326 0.237299929  
0.745907816 0.118796736  
0.319993074 0.162328012  
0.969471222 0.117318882  
0.451747933 0.134955053  
0.721684012 0.363318608  
1.204870529 0.129792441  
1.247355083 0.278813391  
0.531246974 0.133385808  
1.774514081 0.313665065  
0.705369347 0.121418735  
0.846157353 0.254839593  
1.573578247 0.206538208  
0.650964602 0.134427885  
1.189381569 0.214488814  
0.505811073  
0.286626274  
0.373860358  
0.954304769  
0.759874601  
0.85436678  
0.986849234  
1.142026562

0.330722624  
0.833556002  
1.104914222  
0.470246232  
0.835993301  
2.197116847  
0.982189173  
0.838184633  
0.64153263  
1.976628227  
0.755889413  
1.201740369  
0.310511797  
1.426845708  
0.806136397  
0.930573559  
0.934385369  
1.100440161
