# Supplementary material for: The O-GlcNAc transferase OGT is a conserved and essential regulator of the cellular and organismal response to hypertonic stress
Source: PubMed Central journal article supplement (PMC7556452; doi:10.1371/journal.pgen.1008821), 2020-10-02
Supplement: pgen.1008821.s047.pdf [file pgen.1008821.s047.pdf]

| WT         | <i>ogt-1(dr20)</i> | <i>ogt-1p</i> | <i>dpy-7p</i> | <i>nhx-2p</i> | <i>myo-3p</i> | <i>rab-3p</i> |
|------------|--------------------|---------------|---------------|---------------|---------------|---------------|
| 8.46276955 | 1.73576503         | 6.30574371    | 6.12160625    | 3.64941702    | 2.57115205    | 2.11033247    |
| 4.83368674 | 1.63580817         | 5.87670214    | 7.70354562    | 3.93897664    | 2.18665069    | 1.72164368    |
| 9.01367057 | 1.74099463         | 8.36692724    | 7.47835193    | 3.3890769     | 2.3848032     | 2.37878229    |
| 7.38791049 | 1.20181825         | 6.554093      | 5.65804692    | 3.00088148    | 2.72298091    | 3.10766008    |
| 6.42512428 | 1.38630248         | 6.05757081    | 3.91100195    | 2.90170965    | 2.76528883    | 2.09915257    |
| 5.26642917 | 2.01792808         | 7.16790824    | 7.6577129     | 1.53221117    | 2.71415707    | 2.20843182    |
| 9.08684244 | 2.48874303         | 5.68837256    | 7.29892514    | 3.69362529    | 2.60229504    | 1.99932815    |
| 6.0585498  | 1.89306011         | 6.01858143    | 5.30671356    | 2.85372663    | 3.42230505    | 2.37824653    |
| 7.23871738 | 1.69379063         | 5.22753559    | 3.79057357    | 1.04093076    | 2.86691052    | 2.22147572    |
| 8.08582581 | 1.89665909         | 6.2616966     | 5.17576125    | 4.83391135    | 3.83058152    | 1.77629904    |
| 6.55661351 | 2.14296174         | 5.8483286     | 4.34566774    | 4.02806984    | 3.74502428    | 2.70491789    |
| 8.02812053 | 2.08270177         | 7.79747399    | 6.32751514    | 3.12279229    | 2.40577984    | 1.78693556    |
| 7.63975435 | 2.25543459         | 6.02506307    | 6.62354692    | 4.25835312    | 2.03175092    | 2.20723549    |
| 8.4201609  | 2.47977909         | 3.76892288    | 4.34849143    | 3.49968101    | 2.17219454    | 2.2116353     |
| 8.6446676  | 2.45724798         | 5.27166027    | 4.93580682    | 3.39433944    | 2.93275459    | 1.30885192    |
| 7.88573452 | 2.07141746         | 4.29297587    | 7.6736461     | 3.41690569    | 3.58436895    | 1.97090523    |
| 5.94810748 | 1.76547142         | 5.50103729    | 5.99318095    | 3.13071816    | 2.05054386    | 2.39600243    |
| 8.6679686  | 1.70761749         | 5.23583261    | 6.64942015    | 3.86365882    | 3.35460171    | 1.93115588    |
| 5.48917844 | 2.01137637         | 5.63660227    | 5.23291068    | 2.85547155    | 3.29140453    | 1.97741846    |
| 7.67827256 | 1.90004557         | 4.80633487    | 8.40523423    | 2.32465927    | 4.10638628    | 2.31203948    |
| 7.7040434  | 2.06371702         | 7.66182703    | 5.62051823    | 3.37996342    | 2.02785261    | 2.10813512    |
| 10.3767079 | 1.92392522         | 5.2847432     | 9.84455474    | 2.69378248    | 2.45086423    | 1.7554014     |
| 9.62193857 | 2.01848371         | 8.19922853    | 4.004029      | 3.84019052    | 3.38664876    | 2.1571422     |
| 8.54889942 | 2.22363217         | 5.20717135    | 8.26789559    | 3.85646035    | 5.37563294    | 2.01067875    |
| 6.00714577 | 1.77628043         | 8.06981472    | 5.26825479    | 2.61639354    | 1.85006066    | 2.6403925     |
| 8.23584113 | 2.16188753         | 4.29671459    | 5.65468515    | 3.27075501    | 2.61342155    | 1.61863936    |
| 6.23698993 | 1.27825788         | 6.68111031    | 8.98540321    | 3.90349036    | 3.02597678    | 2.62345704    |
| 6.20388881 | 1.6684228          | 7.35618282    | 6.03314833    | 2.866494      | 1.95981971    | 2.23086224    |
| 6.32768001 | 1.7163745          | 6.22934065    | 5.10596724    | 2.72381145    | 2.92901791    | 1.77260611    |
| 4.23365297 | 3.11549361         | 5.20027769    | 6.26321949    | 2.5049136     | 2.77790263    | 2.10477929    |
| 8.24156046 | 2.36198326         | 7.00300348    | 7.1935926     | 1.54385237    | 2.70251547    | 2.13829718    |
| 5.19478947 | 2.33834888         | 6.05602721    | 8.15515731    | 2.83890208    | 2.10255488    | 2.03917187    |
| 3.80612972 | 2.12522786         | 4.81719051    | 3.89441063    | 2.42883845    | 2.9935556     | 1.82910351    |
| 5.81883777 | 1.87104779         | 5.46174417    | 4.92539204    | 2.69826523    | 2.15527713    | 1.81225651    |
| 6.79353333 | 1.72227946         | 5.24210298    | 9.44710377    | 3.5781995     | 2.0766582     | 1.45241545    |
| 6.12559002 | 2.05209249         | 6.47961467    | 6.03796836    | 3.7274709     | 4.29568516    | 1.84845639    |
| 5.80110452 | 1.75784153         | 6.89904527    | 3.15680359    | 3.71359083    | 2.89047612    | 2.18818022    |
| 7.22750355 | 2.33834888         | 6.13204913    | 7.05032962    | 4.20709516    | 3.27976117    | 1.98945492    |
| 4.95558304 | 2.39123383         | 5.21545862    | 6.91326862    | 4.15497573    | 3.04013836    | 2.59712672    |
| 4.65821511 | 2.89135353         | 6.346294      | 6.5503486     | 4.40980082    | 1.51435513    | 2.64868259    |
| 5.17866395 | 1.57138779         | 4.02444307    | 4.01001466    | 3.78979647    | 2.12708235    | 1.93640905    |
| 7.04621963 | 2.10786306         | 5.78826148    | 6.18257005    | 4.29266009    | 1.56987511    | 4.0326789     |

|            |            |            |            |            |            |            |
|------------|------------|------------|------------|------------|------------|------------|
| 7.99361051 | 2.69818781 | 8.08286489 | 8.14898299 | 3.26595755 | 3.05107588 | 1.9496239  |
| 8.15206497 | 1.5651666  | 5.93938719 | 5.02489491 | 3.91412657 | 2.19458829 | 2.05805682 |
| 5.98345444 | 2.23671729 | 6.12725081 | 6.47796906 | 3.31950361 | 2.77181074 | 1.95363822 |
| 7.03835555 | 1.56223407 | 5.9220734  | 5.18680503 | 0.99204727 | 3.4212064  | 2.35255659 |
| 7.42411371 | 1.4454637  | 6.74854253 | 5.26230906 | 4.62095432 | 3.05438444 | 2.8978161  |
| 5.88040924 | 1.48130245 | 7.05996447 | 1.82975484 | 0.8383335  | 3.45680807 | 2.57442046 |
| 8.9778088  | 2.04932687 | 4.57769245 | 8.70227026 | 3.62919104 | 2.18707258 | 2.71838476 |
| 10.9139815 | 1.75784153 | 5.07359991 | 4.26942795 | 3.69403478 | 2.59270912 | 2.45949098 |
| 7.26584206 | 2.0311604  | 4.95852729 | 10.0731322 | 2.44556022 | 3.50820225 | 2.22642884 |
| 5.31458124 | 1.42799015 | 6.3280898  | 8.15158945 | 4.03809347 | 1.3521028  | 1.23736473 |
| 5.81503612 | 1.74604587 | 4.90213923 | 6.92358287 | 2.69040566 | 0.79973556 | 2.09042646 |
| 4.87123857 | 1.9543738  | 6.88329402 | 6.44361633 | 2.58150829 | 3.85135808 | 2.45355018 |
| 6.42221699 | 1.83493985 | 5.56883719 | 7.82923944 | 2.84753096 | 2.6234603  | 1.81064131 |
| 6.68416092 | 1.76608657 | 5.99559886 | 6.36805627 | 2.81991277 | 1.90067022 | 1.70172982 |
| 5.83676531 | 1.41036749 | 5.53588549 | 6.87540054 | 4.11123915 | 2.20776541 | 2.72062212 |
| 7.39853061 | 1.97840299 | 4.71033378 | 4.0407086  | 2.79974481 | 3.73297101 | 2.77684465 |
| 6.06692776 | 2.21726529 | 6.63831037 | 7.1636628  | 4.75597676 | 3.95791739 | 2.63800242 |
| 5.7830318  | 1.60281555 | 6.75799812 | 7.99193111 | 2.39246183 | 1.66857518 | 2.44540454 |
| 6.04757416 | 2.78910857 | 5.88187834 | 5.80874551 | 3.97102479 | 2.38907774 | 2.56880169 |
| 7.51683913 | 1.31838115 | 5.31627399 | 5.87392888 | 3.02596152 | 3.05936757 | 2.6403925  |
| 7.89157053 | 2.18430013 | 4.84034813 | 4.2949562  | 4.63722915 | 2.28080426 | 1.92660126 |
| 6.09919768 | 1.85046626 | 4.05968724 | 4.00549123 | 4.02098672 | 2.35167671 | 1.86599418 |
| 5.94111135 | 2.42334502 | 5.99618692 | 4.84440299 | 3.5486276  | 2.08247346 | 1.88094851 |
| 11.8661571 | 2.67012409 | 5.37465485 | 9.38006342 | 3.61960015 | 4.31101737 | 3.56202141 |
| 5.86875436 | 1.49563884 | 6.32134071 | 6.91566967 | 2.36461435 | 1.89556089 | 2.50927824 |
| 7.76793485 | 2.83959017 | 6.019065   | 5.28830877 | 2.60969894 | 1.90067022 | 1.95701432 |
| 8.25762907 | 1.81389578 | 4.9130758  | 5.11457853 | 2.67266007 | 2.83879023 | 2.01755119 |
| 4.96286749 | 1.84376167 | 5.59230379 | 8.04091481 | 4.23884176 | 2.65404469 | 2.30438794 |
| 8.04090998 | 2.08432784 | 8.05882713 | 6.07934344 | 3.34584888 | 2.43429687 | 1.66227666 |
| 7.80117174 | 1.75048655 | 4.05606934 | 4.98490901 | 3.61104646 | 2.26672523 | 2.13766646 |
| 3.86501499 | 2.13769469 | 7.79464997 | 8.88930264 | 2.53444012 | 2.89974046 | 1.93844326 |
| 8.51557349 | 2.06673535 | 4.43474954 | 4.68183914 | 4.07112491 | 2.28391163 | 2.55574636 |
| 9.23468198 | 1.93908589 | 4.95198138 | 4.74471001 | 3.1731599  | 4.46323518 | 3.84559586 |
| 5.43035724 | 1.94319412 | 4.28826598 | 5.00866435 | 1.60731956 | 1.93021432 | 2.81906568 |
| 7.6510841  | 1.94201856 | 1.44442821 | 5.56617898 | 4.72422423 | 2.2658645  | 1.96628628 |
| 5.98126304 | 1.32925743 | 5.72182722 | 8.2196018  | 3.50181193 | 3.13051566 | 1.85407781 |
| 5.2805393  | 1.6564276  | 6.82718021 | 5.08265232 | 3.38484479 | 2.46118959 | 2.29552491 |
| 7.79667797 | 2.13944153 | 4.4485848  | 6.71241584 | 4.73995258 | 3.09154658 | 2.203294   |
| 6.52337254 | 2.11266871 | 6.27185933 | 7.59024407 | 1.56139614 | 2.10839374 | 2.53795658 |
| 1.16659265 | 1.65395409 | 6.52572031 | 8.38970558 | 3.33668217 | 2.36124218 | 1.62831352 |
| 3.0972394  | 1.41206831 | 5.60049518 | 5.48784829 | 4.0925483  | 1.17394337 | 2.05132013 |
| 8.2445563  | 2.28849934 | 4.65035424 | 6.72221759 | 3.16295682 | 3.84470174 | 2.35566967 |
| 7.56179668 | 2.33203057 | 6.54885392 | 1.26480749 | 3.24262856 | 2.61731637 | 1.98795458 |

|            |            |            |            |            |            |            |
|------------|------------|------------|------------|------------|------------|------------|
| 6.24154931 | 2.4040355  | 6.58957533 | 5.24356599 | 2.11118352 | 2.77181074 | 2.17271905 |
| 5.14009943 | 2.98376362 | 6.43613984 | 4.99760794 | 4.13703252 | 2.95170309 | 2.81976243 |
| 7.44466658 | 1.75995432 | 6.02572862 | 6.61703793 | 3.22746689 | 3.32617288 | 2.26241638 |
| 10.1817295 | 1.08478726 | 7.83641555 | 6.57480713 | 1.91079948 | 2.76991872 | 2.08684083 |
| 6.69628475 | 1.90104771 | 4.08930589 | 7.26970439 | 4.10197292 | 3.54449311 | 2.2481945  |
| 7.40572063 | 2.14546813 | 4.90852883 | 5.90008526 | 4.65096724 | 3.69574765 | 2.71692562 |
| 7.8118596  | 2.11930388 | 7.77933888 | 7.53734236 | 3.1661644  | 4.00141099 | 2.02006192 |
| 7.97980462 | 1.17402226 | 4.99068465 | 6.76927238 | 3.04919112 | 2.41903483 | 1.14232282 |
| 6.56891032 | 1.79164618 | 5.29106466 | 4.44732078 | 4.79529902 | 4.6302671  | 1.74459893 |
| 5.66802047 | 1.7774954  | 7.38277143 | 4.78443548 | 3.4089781  | 3.65067756 | 1.76910754 |
| 7.99223986 | 1.7719268  | 9.41680029 | 5.71798386 | 4.28046295 | 3.07031343 | 1.72164368 |
| 8.62177185 | 1.37362289 | 5.70341426 | 3.60311312 | 4.93377964 | 3.98623054 | 2.31871203 |
| 5.4186856  | 3.36173703 | 6.23890935 | 5.90008526 | 2.81332638 | 2.35418134 | 2.07862492 |
| 9.18871368 | 1.79587176 | 1.80502086 | 7.22051977 | 3.93783192 | 1.2388984  | 2.05910872 |
| 6.23708436 | 1.28562201 | 4.66213398 | 7.03100238 | 3.22517892 | 2.16336448 | 1.6303444  |
| 8.71697274 | 1.04941376 | 7.5710111  | 1.22528226 | 1.72018219 | 2.44756118 | 2.87926664 |
| 6.79554812 | 0.97100928 | 2.1547703  | 3.08470182 | 4.30349467 | 1.67706196 | 3.06441432 |
| 9.33798199 | 1.81418261 | 4.8164084  | 6.07404879 | 0.85167062 | 1.82756752 | 2.09297859 |
| 6.8777841  | 1.38339008 | 7.77064476 | 6.68385952 | 2.89879453 | 0.88329902 | 2.31931273 |
| 5.18042448 | 2.11029652 | 4.64161006 | 0.69778786 | 2.30946053 | 3.47551126 | 0.70032963 |
| 12.8515956 | 1.95221824 | 6.17245241 | 5.85941809 | 3.78022224 | 2.04164065 | 2.8587392  |
| 5.78675042 | 2.66507369 | 5.54147766 | 7.84821314 | 5.18626281 | 3.28577402 | 2.51947856 |
| 5.7606787  | 1.50664897 | 4.69106861 | 6.75298984 | 5.44015851 | 3.15111115 | 2.46626643 |
| 5.63504919 | 1.87468089 | 6.63389931 | 7.38485001 | 1.36121715 | 2.96945289 | 3.0959382  |
| 0.60638723 | 1.5939209  | 3.27336856 | 6.1872409  | 3.90349036 | 0.78262891 | 3.72572106 |
| 5.28352603 |            | 0.86934336 | 1.32976369 | 3.31913551 | 3.59441263 | 1.82976623 |
| 6.86747708 |            | 1.56879886 | 2.72033412 | 2.51838088 | 1.5386378  | 3.15072047 |
| 8.00808453 |            |            | 1.32976369 | 2.33312067 | 1.34004087 | 2.20723549 |
| 6.16640268 |            |            | 6.29684149 | 5.06398749 |            | 2.47741076 |
| 7.38764047 |            |            |            | 2.89429529 |            | 2.25789335 |
| 5.38803991 |            |            |            | 2.89370714 |            | 3.32783197 |
| 8.63238163 |            |            |            | 4.07320733 |            | 2.1862142  |
| 10.3231893 |            |            |            | 4.22214263 |            | 3.84798973 |
| 9.07639046 |            |            |            |            |            | 1.79008823 |
| 7.78544357 |            |            |            |            |            |            |
| 0.84795345 |            |            |            |            |            |            |
| 0.5565352  |            |            |            |            |            |            |
| 0.98346251 |            |            |            |            |            |            |
| 6.21095348 |            |            |            |            |            |            |
| 8.60187851 |            |            |            |            |            |            |
| 8.89395629 |            |            |            |            |            |            |
| 0.94225377 |            |            |            |            |            |            |
| 5.84251978 |            |            |            |            |            |            |

7.66438235

1.62174896
