# Supplementary material for: The O-GlcNAc transferase OGT is a conserved and essential regulator of the cellular and organismal response to hypertonic stress
Source: PubMed Central journal article supplement (PMC7556452; doi:10.1371/journal.pgen.1008821), 2020-10-02
Supplement: pgen.1008821.s048.pdf [file pgen.1008821.s048.pdf]

| WT          | <i>ogt-1(dr20)</i> | <i>ceOGT-1</i> | <i>hsOGT</i> | <i>hsOGTH498A</i> |
|-------------|--------------------|----------------|--------------|-------------------|
| 4.87267624  | 1.998888921        | 6.066814141    | 1.488335015  | 3.483531773       |
| 5.871230929 | 1.595063178        | 8.888652059    | 2.605408397  | 3.073723931       |
| 6.657875043 | 2.19764833         | 4.836267686    | 2.390900075  | 2.389796374       |
| 7.297732219 | 1.841642993        | 8.607885737    | 2.286313314  | 2.380017006       |
| 6.112407228 | 1.8566157          | 4.03158846     | 4.336726476  | 3.098063374       |
| 7.708684285 | 1.863164697        | 3.456899632    | 2.785870976  | 3.714422796       |
| 7.688651953 | 2.331065925        | 4.688665454    | 2.447990003  | 3.025622895       |
| 4.788829633 | 1.770213332        | 4.946282734    | 3.498970785  | 2.877039078       |
| 7.002606354 | 1.859249522        | 5.212443674    | 2.606170115  | 2.71151751        |
| 5.58990771  | 2.241672003        | 4.07868687     | 3.180882532  | 2.196422648       |
| 6.044213278 | 2.111263183        | 3.931841751    | 3.030129806  | 3.129139627       |
| 7.56739463  | 1.832525948        | 4.848395634    | 2.791203592  | 2.098499755       |
| 7.160469552 | 2.33224461         | 4.713179608    | 2.950942876  | 2.519354762       |
| 6.399560634 | 2.157884719        | 6.113375087    | 1.896527613  | 2.732162204       |
| 10.19988955 | 1.969486878        | 5.420051672    | 2.898379838  | 2.579419576       |
| 4.109281039 | 1.788808972        | 4.317972382    | 2.410976736  | 3.226046049       |
| 6.035340433 | 2.571949697        | 5.027772617    | 2.94277868   | 3.030143463       |
| 6.078455092 | 2.27745164         | 4.381614723    | 2.49993114   | 3.144918317       |
| 7.913514498 | 2.333685014        | 3.123937504    | 3.08617028   | 2.647286957       |
| 6.044311896 | 2.139627668        | 4.952287968    | 2.211262267  | 2.617999285       |
| 5.265318518 | 2.192197021        | 4.807595056    | 1.271088248  | 2.56064482        |
| 6.216301777 | 2.01893279         | 6.401105247    | 2.481371342  | 2.659289244       |
| 7.309485014 | 2.120378148        | 3.838764113    | 2.770225941  | 2.604640178       |
| 6.690990128 | 1.753213371        | 3.607238047    | 2.627101733  | 2.065918103       |
| 5.5677227   | 2.025310892        | 5.54549257     | 2.405782312  | 2.061514287       |
| 14.83539222 | 1.99050559         | 3.180619413    | 2.924576375  | 2.529369769       |
| 8.079084869 | 1.911061908        | 4.597685108    | 2.82156439   | 2.806443589       |
| 5.079940674 | 1.857519225        | 7.310092342    | 3.033113285  | 3.040651905       |
| 6.765764953 | 2.895595308        | 4.664441504    | 3.211299549  | 3.039539791       |
| 6.782625972 | 2.256661132        | 8.640596749    | 2.545212536  | 3.084471217       |
| 4.553834118 | 2.141148947        | 5.154447264    | 3.020395828  | 2.600843326       |
| 6.031282347 | 1.862335611        | 3.644330889    | 2.951856077  | 3.294859643       |
| 6.595027872 | 2.367826705        | 3.624636519    | 2.633132104  | 3.418152281       |
| 6.425579256 |                    | 4.888105905    | 4.278839669  | 2.972392373       |
| 6.31155219  |                    | 4.030622244    | 2.670665785  | 3.501135247       |
| 0.771069511 |                    | 3.715923661    | 2.881040481  | 2.97914781        |
|             |                    | 4.698462176    | 5.59029194   | 3.249655855       |
|             |                    | 8.503847491    | 2.922963705  | 2.968065746       |
|             |                    | 8.769425653    | 2.319410093  | 2.580806012       |
|             |                    | 4.258589658    | 2.820572366  | 3.124089912       |
|             |                    | 3.919750697    | 1.728352268  | 3.043624935       |
|             |                    | 6.171087509    | 2.861984145  | 2.261425093       |

|             |             |             |
|-------------|-------------|-------------|
| 5.207923313 | 4.110968697 | 2.894099228 |
| 4.31819875  | 2.730686934 | 2.829756503 |
| 4.643216134 | 2.557236557 | 4.025114671 |
| 7.714627393 | 3.787313726 | 2.523590554 |
| 5.688086455 | 3.335672206 | 2.999539939 |
| 6.148604824 | 2.558187537 | 3.218543616 |
| 6.675011439 | 4.562036349 | 4.489126837 |
| 8.658900423 | 2.310815513 | 2.978274416 |
| 8.26707787  | 1.756476343 | 2.530865479 |
| 4.855222992 |             | 3.041260731 |
| 5.885195852 |             | 2.863452749 |
|             |             | 1.638974261 |
|             |             | 2.804979285 |
