# Supplementary material for: The O-GlcNAc transferase OGT is a conserved and essential regulator of the cellular and organismal response to hypertonic stress
Source: PubMed Central journal article supplement (PMC7556452; doi:10.1371/journal.pgen.1008821), 2020-10-02
Supplement: pgen.1008821.s049.pdf [file pgen.1008821.s049.pdf]

rls4 50mM NaCl 250mM NaI 20 50mM NaCr 20 250mM NaI 93 50mM NaCr 93 250mM NaCl

|             |             |             |             |             |             |
|-------------|-------------|-------------|-------------|-------------|-------------|
| 0.8860054   | 8.329057615 | 0.927439758 | 2.419329506 | 0.83598681  | 1.631119966 |
| 1.299190611 | 8.501991438 | 1.010840358 | 1.977176974 | 0.853520767 | 2.180848689 |
| 0.979847575 | 4.910722158 | 1.035564918 | 1.984541371 | 1.031751633 | 2.556187633 |
| 1.059270394 | 6.369745966 | 0.946901311 | 1.65076752  | 0.960691016 | 2.714869486 |
| 0.990510736 | 5.648284426 | 1.13681328  | 0.878342655 | 0.871133856 | 2.803719346 |
| 1.080926588 | 6.593652188 | 0.905911906 | 1.634568155 | 1.511981864 | 2.277121946 |
| 0.968853773 | 7.192389926 | 1.067463281 | 2.115864718 | 1.229876381 | 2.750350088 |
| 1.218691742 | 6.531346287 | 1.000656274 | 2.04771825  | 0.91517305  | 2.781769836 |
| 0.789336426 | 1.044076818 | 0.888352258 | 2.028043204 | 0.925728575 | 2.274593088 |
| 1.078655734 | 6.697551597 | 1.373778831 | 1.916059949 | 1.216555339 | 2.301742492 |
| 0.834985426 | 5.735528836 | 1.054702115 | 1.723467988 | 0.866879234 | 3.339147558 |
| 1.179582586 | 6.40022322  | 0.98702966  | 1.815497191 | 1.155953418 | 2.83213709  |
| 0.948587117 | 6.194678953 | 0.906617445 | 2.174234304 | 1.022596429 | 2.654108757 |
| 1.010002003 | 6.953763079 | 0.928576127 | 2.570660871 | 1.342496466 | 2.300841966 |
| 1.086140061 | 5.679868878 | 0.914916578 | 1.822898834 | 0.962676736 | 2.848798866 |
| 1.005326068 | 7.298425006 | 1.122697335 | 2.095644644 | 1.038624587 | 3.017648253 |
| 1.120916025 | 5.233735457 | 1.042030383 | 2.172757845 | 0.73850733  | 2.81341715  |
| 0.895654133 | 7.046989072 | 1.330396342 | 1.93026255  | 0.873814268 | 2.481462847 |
| 0.921244251 | 4.922435207 | 1.06602271  | 2.063789289 | 0.996454867 | 2.4869149   |
| 1.280837732 | 5.886479812 | 1.087940934 | 1.741872681 | 0.824592442 | 2.89641172  |
| 0.889477208 | 5.934994118 | 1.260877681 | 2.258388852 | 0.892447793 | 2.646833239 |
| 0.965113025 | 7.531045902 | 0.890890408 | 1.478218158 | 0.922044276 | 3.667415842 |
| 0.961074895 | 6.699726519 | 0.752931001 | 1.641113909 | 0.975909405 | 2.450501596 |
| 0.869311365 | 6.634611066 | 0.975213368 | 2.016824242 | 0.840014853 | 2.745233157 |
| 1.068011105 | 6.890907    | 0.953100146 | 1.893802622 | 1.13975774  | 2.445175226 |
| 1.027496757 | 5.634276436 | 1.03439907  | 1.738873546 | 1.191126513 | 2.284974091 |
| 0.913693069 | 6.384884994 | 0.900347843 | 2.534511748 | 0.976951302 | 2.799897829 |
| 1.095533704 | 7.763434606 | 0.993382224 | 2.307680879 | 1.101535562 | 2.876691258 |
| 1.161996082 | 6.988749493 | 1.159458963 | 1.92589544  | 0.860574658 | 2.25073372  |
| 0.911495635 | 7.824889443 | 1.05062888  | 1.795279155 | 0.821174854 | 2.575869723 |
| 1.069666936 | 6.080212059 | 1.009916251 | 2.385172725 | 1.212627926 | 2.724453428 |
| 1.085267659 | 5.897912932 | 0.992833091 | 1.774738203 | 0.97927461  | 2.246245716 |
| 0.913518933 | 6.4528409   | 1.21952998  | 1.878697763 | 1.272153842 | 3.953367871 |
| 1.095533704 | 6.613063194 | 0.953689134 | 2.027326581 | 1.143966312 | 2.127876243 |
| 0.950033134 | 5.066843382 | 1.121861995 | 1.54421004  | 0.966631393 | 2.765076649 |
| 1.082989425 | 6.022130596 | 0.837702921 | 2.652190983 | 1.192910399 | 2.274593088 |
| 1.595117361 | 8.00576135  | 0.901624027 | 2.367841171 | 0.980575108 | 1.423506952 |
| 1.139866001 | 6.216463309 | 0.950283101 | 1.292787965 | 0.851287881 | 2.994799808 |
| 0.871714991 | 5.275069823 | 1.002973896 | 2.16058461  | 1.147432877 | 2.653438527 |
| 0.858227544 | 7.008344118 | 1.033986794 | 2.25428269  | 1.00147479  | 2.315795323 |
| 0.881190153 | 5.673694754 | 0.917093067 | 1.906200292 | 1.075718322 | 2.849394351 |
| 0.804260854 | 5.744888117 | 1.007093504 | 1.952212023 | 0.952072538 | 2.78645746  |

|             |             |             |             |             |             |
|-------------|-------------|-------------|-------------|-------------|-------------|
| 1.033804344 | 6.285100808 | 0.742918919 | 2.50908082  | 1.229876381 | 2.971628348 |
| 1.108774888 | 5.104375556 | 1.03439907  | 2.45762871  | 1.017042777 | 1.416493323 |
| 1.143287738 | 8.239326401 | 1.662995427 | 2.41402562  | 0.83419689  | 1.230914835 |
| 0.982660535 | 5.499549016 | 0.970619899 | 2.183731369 | 0.887467616 | 2.33017138  |
| 0.853619824 | 5.249432333 | 0.951159746 | 2.293786796 | 0.992970759 | 2.282393657 |
| 0.997499368 | 7.822495046 | 1.11860679  | 2.321918144 | 0.889453002 | 3.155440411 |
| 0.961074895 | 1.164791582 | 1.071708164 | 2.28474597  | 1.059662825 | 2.732149624 |
| 0.858317731 | 6.072006644 | 0.912191585 | 1.818901249 | 0.857686823 | 2.860037479 |
| 0.712524851 | 9.099637095 | 0.916611653 | 2.43905996  | 0.784641599 | 3.029222794 |
| 0.988652367 | 5.341788372 | 0.858985241 | 2.032549967 | 0.894212755 | 2.662402847 |
| 0.900772157 | 5.634276436 | 0.875260751 | 2.257946378 | 1.040255081 | 2.366580308 |
| 1.14021792  | 8.227052366 | 0.78058969  | 2.105976742 | 1.038624587 | 2.541541498 |
| 0.835521877 | 7.413111399 | 0.948476479 | 2.410138301 | 0.850268374 | 2.569430049 |
| 0.904541078 | 4.43348796  | 0.978232604 | 1.787584661 | 0.937839874 | 2.366580308 |
| 0.914149961 | 9.007721569 | 0.972695439 | 1.752329892 | 0.991058902 | 2.199527581 |
| 0.895929296 | 5.732186453 | 1.157239086 | 2.169124471 | 0.857885362 | 2.828112567 |
| 0.981038983 | 5.919569467 | 0.908590217 | 2.375707753 | 1.392942163 | 2.883143523 |
| 0.9187876   | 6.221434812 | 0.779529107 | 2.633703166 | 0.985452999 | 2.491137166 |
| 0.999735914 | 6.182186265 | 0.957946675 | 0.997797256 | 1.202072537 | 2.019481863 |
| 1.007442544 | 6.675998367 | 1.014021602 | 2.47615128  | 0.877924953 | 2.909880846 |
| 1.028659562 | 5.103559639 | 1.014973735 | 1.937470401 | 0.93991842  | 2.895580612 |
| 0.78045241  | 5.248300583 | 1.172155367 | 2.247291118 | 1.000215074 | 2.46124352  |
| 1.220926116 | 4.650498112 | 1.03078229  | 2.161894056 | 0.863105759 | 2.729987771 |
| 0.844473897 | 4.726273663 | 0.976679854 | 2.186408331 | 0.892447793 | 3.786528493 |
| 0.883668888 | 1.060502103 | 1.116937227 | 1.950426736 | 0.873814268 | 2.826437145 |
| 1.033804344 | 6.333554228 | 0.982360168 | 1.927562882 | 0.97927461  | 2.755607208 |
| 0.769647096 | 8.729017312 | 0.948476479 | 1.486251952 | 0.883903489 | 2.58551505  |
| 1.02188438  | 7.562898972 | 0.877107293 | 1.973593795 | 0.986717523 | 3.142818649 |
| 1.023604724 | 6.623324683 | 2.096820321 | 1.828604931 | 0.964720635 | 3.155440411 |
| 0.912944754 | 4.439519916 | 0.846214487 | 2.217327237 | 0.927113935 | 2.410898291 |
| 0.853891822 | 6.076637566 | 0.95097979  | 1.710900645 | 0.9273131   | 1.613577483 |
| 0.888211589 | 9.995410337 | 0.847386205 | 2.1948163   | 1.155418223 | 1.991473919 |
| 1.083207024 | 7.308151461 | 0.685129202 | 2.267721037 | 1.127756681 | 1.939819925 |
| 0.969309169 | 5.182524738 | 1.168591381 | 2.754655002 | 1.133034588 | 2.262865633 |
| 0.932702513 | 6.81720746  | 0.957482216 | 1.204506034 | 1.032689589 | 2.022217229 |
| 0.902595582 | 8.617964385 | 1.092825567 | 2.303209629 | 1.055596972 | 2.494734476 |
| 1.042116724 | 1.033672967 | 1.138565334 | 2.463696929 | 1.019449979 | 1.954584546 |
| 0.878008962 | 6.182861889 | 0.761031806 | 1.254414654 | 1.227849198 | 1.240903532 |
| 0.939936164 | 2.980496107 | 1.125608259 | 2.256325454 | 0.846581574 | 2.357371824 |
| 0.870863706 | 4.997434569 | 1.094854641 | 2.40559087  | 1.110843818 | 1.472538858 |
| 1.110851569 | 2.056110358 | 0.999614738 | 1.873797665 | 1.221460804 | 2.15347592  |
| 1.006872723 | 3.97399481  | 0.863893729 | 1.881216547 | 0.93991842  | 2.868582192 |
| 0.872519156 | 0.959839184 | 1.151304527 | 1.949298669 | 1.040970032 | 2.45532707  |

|             |             |             |             |             |             |
|-------------|-------------|-------------|-------------|-------------|-------------|
| 0.928921287 | 5.169021719 | 0.929964548 | 2.222105959 | 1.073910392 | 2.137556407 |
| 1.333379837 | 5.683443371 | 0.863893729 | 1.561179381 | 0.913989636 | 2.943309963 |
| 0.934595617 | 5.730774584 | 0.855254791 | 1.22497431  | 0.840014853 | 2.422358295 |
| 0.916039482 | 4.417248077 | 1.129909785 | 1.448602289 | 0.851641357 | 2.890160022 |
| 1.041780882 | 7.154570517 | 0.951059476 | 2.20507681  | 0.818516498 | 2.875284487 |
| 0.991338923 | 6.519574702 | 1.04309749  | 2.115864718 | 0.943263326 | 4.049481861 |
| 1.198608112 | 9.369345427 | 0.83989668  | 2.014642038 | 0.831012933 | 2.408099261 |
| 0.960953055 |             | 0.84520372  | 1.304310139 | 1.02449364  | 2.76880542  |
| 0.896786439 |             | 0.774066941 | 2.1253529   | 1.147432877 | 2.255513362 |
| 1.166662733 |             | 1.088506098 | 2.474088289 | 0.766638691 | 1.274312474 |
| 1.024574965 |             | 0.920360065 | 1.374085205 | 1.16508569  | 2.694533385 |
| 1.164791582 |             | 0.984668345 | 1.334502503 | 1.308708005 | 2.863477953 |
| 0.821292261 |             | 0.791902584 | 1.241602921 | 0.949907667 | 2.517261451 |
| 1.10049087  |             | 0.815193837 | 1.429136695 | 1.034135933 | 0.625134421 |
| 0.743756827 |             |             | 2.580510146 | 1.397979929 | 2.510633023 |
| 0.965113025 |             |             | 1.11860679  | 0.848704662 | 2.151436644 |
| 0.875102484 |             |             | 1.054011186 | 0.996454867 | 2.515037375 |
| 1.249184029 |             |             | 2.05265126  | 0.893673683 | 2.948526286 |
| 1.238951323 |             |             | 2.146775915 | 0.887467616 | 2.6918449   |
| 1.091845039 |             |             | 2.461233233 | 1.118069437 | 2.595014701 |
| 0.93541724  |             |             | 2.416049961 | 0.661980506 | 1.113684851 |
| 0.633355423 |             |             |             | 0.860574658 | 1.522555163 |
| 0.97811118  |             |             |             | 1.183290154 | 1.04627761  |
| 1.042560367 |             |             |             | 0.866635042 | 1.325901671 |
| 0.776003041 |             |             |             | 1.090222389 | 1.396670346 |
| 1.219795629 |             |             |             | 1.034135933 | 0.97927461  |
| 1.055592371 |             |             |             | 1.030014227 | 0.929209446 |
| 0.657643389 |             |             |             | 0.743782383 | 1.001727115 |
| 1.328061513 |             |             |             | 1.239637304 | 1.326490873 |
| 1.846582922 |             |             |             | 1.002316366 | 1.302704757 |
| 1.045539111 |             |             |             | 1.042899797 | 3.625399621 |
| 0.797267282 |             |             |             | 0.974474245 |             |
| 1.106552003 |             |             |             | 0.95002507  |             |
| 0.974392958 |             |             |             | 1.064601476 |             |
| 1.006181665 |             |             |             |             |             |
| 1.098114467 |             |             |             |             |             |
