# Supplementary material for: The O-GlcNAc transferase OGT is a conserved and essential regulator of the cellular and organismal response to hypertonic stress
Source: PubMed Central journal article supplement (PMC7556452; doi:10.1371/journal.pgen.1008821), 2020-10-02
Supplement: pgen.1008821.s050.pdf [file pgen.1008821.s050.pdf]

WT  
ogt-1(dr20)  
ogt-1(dr93)

| Unadapted |   |   |   |   | Adapted |    |    |    |    |
|-----------|---|---|---|---|---------|----|----|----|----|
| 0         | 0 | 0 | 0 | 0 | 15      | 20 | 25 | 35 | 20 |
| 0         | 0 | 0 | 0 | 0 | 0       | 0  | 0  | 5  | 0  |
| 0         | 0 | 0 | 0 | 0 | 0       | 0  | 10 | 0  | 0  |
