# Supplementary material for: The O-GlcNAc transferase OGT is a conserved and essential regulator of the cellular and organismal response to hypertonic stress
Source: PubMed Central journal article supplement (PMC7556452; doi:10.1371/journal.pgen.1008821), 2020-10-02
Supplement: pgen.1008821.s051.pdf [file pgen.1008821.s051.pdf]

|            |             |             |             |             |             |             |
|------------|-------------|-------------|-------------|-------------|-------------|-------------|
| 50mM NaCl  | 0.72867042  | 1.166365255 | 0.959750246 | 0.972549354 | 0.961427864 | 0.700150683 |
| 250mM NaCl | 2.945028013 | 4.502543305 | 3.374998792 | 2.15370756  | 5.62669425  | 3.588959951 |
| 50mM NaCl  | 1.240439975 | 0.91710628  | 0.749767362 | 1.099957807 | 1.265895661 | 1.136337735 |
| 250mM NaCl | 1.304932375 | 1.15409093  | 0.821667578 | 1.150029723 | 1.048303899 | 1.359596892 |

|             |             |             |             |             |             |             |
|-------------|-------------|-------------|-------------|-------------|-------------|-------------|
| 0.759031687 | 0.954099908 | 4.35670621  | 0.816799978 | 0.98813941  | 0.842056206 | 0.95375271  |
| 2.766756106 | 5.503379225 | 1.596792207 | 3.267457804 | 3.03027506  | 4.760297861 | 2.052492703 |
| 0.957905192 | 1.103859175 | 0.935831948 | 0.723678069 | 0.922510497 | 1.010801986 | 1.194124899 |
| 1.118302445 | 0.769814617 | 1.045300562 | 0.93752423  | 1.187866722 | 0.753247588 | 0.969067102 |

|             |             |             |             |             |             |             |
|-------------|-------------|-------------|-------------|-------------|-------------|-------------|
| 0.650943163 | 0.870730251 | 0.569263894 | 0.781131796 | 1.039709592 | 0.8782221   | 0.95213188  |
| 2.68087339  | 2.301064484 | 1.923840798 | 2.338806812 | 2.469576782 | 1.465558927 | 1.433142098 |
| 1.03340739  | 0.660150198 | 1.571343428 | 1.06119764  | 1.076277816 | 0.960390675 | 0.860223078 |
| 1.031077604 | 1.109183597 | 1.207853303 | 1.01565125  | 1.306972338 | 1.012757656 | 1.117889613 |

|             |             |             |             |             |             |             |
|-------------|-------------|-------------|-------------|-------------|-------------|-------------|
| 0.814960338 | 0.848535483 | 0.867149916 | 0.746476276 | 0.821245379 |             |             |
| 2.658024487 | 1.003028108 | 0.724409189 | 1.276944224 | 1.431892931 | 0.986102009 | 1.312010452 |
| 0.873405198 | 1.044061075 | 1.073140943 | 0.922875414 | 1.037866281 | 0.790432473 | 1.099888762 |
| 0.929711528 | 0.933918368 | 0.957055985 | 1.033318163 | 1.186210235 | 1.102033199 | 0.952645589 |

1.093906494 5.998108089 0.587840244 2.330182893 3.871921269 3.209977623 2.560084832  
0.872784706 0.804338337  
1.083743606 1.031103359 0.877642443 1.010736535 0.881099161 1.011744899 1.134288575

6.229919029 3.069546045 2.94544041 4.145034045 3.078739055 1.952716703 3.075561822

0.964591859 1.454004645 1.197813734 0.637715245 1.201125208 1.376783835 0.94620501

1.349649278 0.751450719 1.079719422



























ev RNAi







































|             |             |
|-------------|-------------|
| 0.819974479 | 0.897648054 |
| 4.632659727 | 2.414568583 |
| 1.240439975 | 0.91710628  |
| 1.304932375 | 1.15409093  |

|             |             |             |             |             |             |             |
|-------------|-------------|-------------|-------------|-------------|-------------|-------------|
| 0.823885327 | 1.156749711 | 0.89652256  | 1.31193626  | 1.016328881 | 1.117504034 | 1.188671396 |
| 2.426289305 | 4.727042063 | 5.419476023 | 3.448559707 | 4.033809098 | 3.349620539 | 5.420751785 |
| 0.749767362 | 1.099957807 | 1.265895661 | 1.136337735 | 0.957905192 | 1.103859175 | 0.935831948 |
| 0.821667578 | 1.150029723 | 1.048303899 | 1.359596892 | 1.118302445 | 0.769814617 | 1.045300562 |

|             |             |             |             |             |             |             |
|-------------|-------------|-------------|-------------|-------------|-------------|-------------|
| 0.733772869 | 1.101343455 | 0.934198036 | 0.840689515 | 1.160775423 |             |             |
| 2.695725212 | 4.329755052 | 2.022612891 | 4.927468013 | 5.340015696 | 2.631439802 | 3.02493625  |
| 0.723678069 | 0.922510497 | 1.010801986 | 1.194124899 | 1.03340739  | 0.660150198 | 1.571343428 |
| 0.93752423  | 1.187866722 | 0.753247588 | 0.969067102 | 1.031077604 | 1.109183597 | 1.207853303 |

|            |             |             |             |             |             |             |
|------------|-------------|-------------|-------------|-------------|-------------|-------------|
| 2.2943897  | 2.838068139 | 3.381656461 | 2.311583553 | 2.659506667 | 3.271033326 | 2.764751845 |
| 1.06119764 | 1.076277816 | 0.960390675 | 0.860223078 | 0.873405198 | 1.044061075 | 1.073140943 |
| 1.01565125 | 1.306972338 | 1.012757656 | 1.117889613 | 0.929711528 | 0.933918368 | 0.957055985 |



|             |             |             |             |             |             |             |
|-------------|-------------|-------------|-------------|-------------|-------------|-------------|
| 3.672516745 | 3.188256041 | 2.184195991 | 3.209042906 | 5.07548249  | 2.276440332 | 3.788950244 |
| 0.922875414 | 1.037866281 | 0.790432473 | 1.099888762 | 0.872784706 | 0.804338337 |             |
| 1.033318163 | 1.186210235 | 1.102033199 | 0.952645589 | 1.083743606 | 1.031103359 | 0.877642443 |

3.214322328

1.010736535 0.881099161 1.011744899 1.134288575 0.964591859 1.454004645 1.197813734

0.637715245 1.201125208 1.376783835 0.94620501 1.349649278 0.751450719 1.079719422



























} mai
