# Supplementary material for: The O-GlcNAc transferase OGT is a conserved and essential regulator of the cellular and organismal response to hypertonic stress
Source: PubMed Central journal article supplement (PMC7556452; doi:10.1371/journal.pgen.1008821), 2020-10-02
Supplement: pgen.1008821.s052.pdf [file pgen.1008821.s052.pdf]

| ev RNAi 50mM | ev RNAi 250mM | ev RNAi 50mM | ev RNAi 250mM | lg-1 RNAi 50mM | lg-1 RNAi 250mM |
|--------------|---------------|--------------|---------------|----------------|-----------------|
| 1.389237843  | 1.022048229   | 7.510693309  | 5.799139029   | 0.941170284    | 0.950421416     |
| 0.792619915  | 0.889245705   | 4.614302764  | 3.654812846   | 1.267279888    | 1.235936753     |
| 0.679202569  | 0.902597742   | 4.039942261  | 3.330097083   | 1.025945266    | 0.960819631     |
| 0.86819103   | 1.073527317   | 3.124415577  | 3.5149239     | 1.134445788    | 1.009576276     |
| 0.685077158  | 1.09353188    | 3.551519324  | 4.387532437   | 0.842453108    | 0.899474612     |
| 1.433244505  | 1.026994226   | 3.93205744   | 2.083941917   | 1.040110785    | 0.925934781     |
| 0.888220385  | 0.957174196   | 4.020959585  | 4.054320112   | 0.713901004    | 0.737229593     |
| 0.924494761  | 0.701468092   | 4.943157924  | 5.286250037   | 1.091304713    | 0.810787808     |
| 0.817623542  | 1.018339866   | 4.882964696  | 4.145089539   | 1.11543883     | 1.180871292     |
| 0.941475467  | 0.951456309   | 5.649930209  | 3.964870449   | 0.804816073    | 0.909452506     |
| 0.972433619  | 0.899700489   | 4.725449705  | 3.80832907    | 0.985666012    | 1.014311131     |
| 1.086379429  | 0.759784586   | 5.072784407  | 3.260567583   | 0.906757725    | 0.919744831     |
| 0.828071707  | 0.709836483   | 3.361247909  | 4.175450757   | 1.117489269    | 1.158429084     |
| 1.057780187  | 0.741608555   | 2.893870007  | 3.873467835   | 0.798320325    | 1.165065609     |
| 0.788284478  | 0.95855673    | 3.461683604  | 3.163031949   | 0.764992654    | 1.141795709     |
| 0.976397819  | 1.142820642   | 2.859011213  | 2.669020297   | 1.217399162    | 0.948568743     |
| 1.460499647  | 1.120357337   | 4.531944643  | 4.992029501   | 1.031370358    | 1.071531358     |
| 0.686367322  | 0.944460307   | 4.291532389  | 3.086861881   | 0.87878748     | 1.069869094     |
| 0.793605107  | 0.950242717   | 4.662373233  | 5.386470397   | 1.694927962    | 1.005742749     |
| 1.130690522  | 0.60901406    | 4.537622552  | 2.999999996   | 0.957482215    | 1.044841391     |
| 1.010507404  | 1.060431247   | 4.977248668  | 4.708641013   | 0.887913717    | 0.907832662     |
| 1.698471246  | 0.831668645   | 3.453420114  | 2.787404261   | 0.845734784    | 0.851684049     |
| 0.786897467  | 0.87776721    | 2.79806779   | 3.861885714   | 0.833901457    | 0.853711869     |
| 0.7954507    | 1.25066428    | 3.725528597  | 2.040356467   | 0.981773518    | 0.870378695     |
| 1.282338661  | 0.94799467    | 3.977253502  | 3.772102736   | 1.135227194    | 0.911154198     |
| 0.818286606  | 0.976998761   | 4.209326644  | 6.508884402   | 1.03425139     | 1.069926102     |
| 1.074933379  | 0.986502114   | 4.753536716  | 2.919240949   | 0.921680558    | 1.06418377      |
| 1.227266795  | 1.07738435    | 3.091017667  | 4.245873781   | 0.948680029    | 1.052521482     |
| 1.100091394  | 1.180880049   | 2.751448099  | 5.20667475    | 1.047096244    | 1.073237778     |
| 0.767041747  | 0.93529079    | 4.348189062  | 3.708669488   | 1.246077941    | 1.168237294     |
| 1.140535931  | 0.985019952   | 5.311641485  | 4.733589906   | 1.069733317    | 0.903650446     |
| 1.342532828  | 1.046111499   | 3.491144741  | 4.136415989   | 1.068766108    | 1.184180979     |
| 0.787574951  | 0.956862311   | 4.863489337  | 2.468699138   | 0.888763395    | 1.115646192     |
| 0.809267462  | 1.288094453   | 2.44936987   | 3.67861312    | 1.001741793    | 0.818373033     |
| 0.883834112  | 0.648036319   | 3.525292877  | 4.645940915   | 0.946726225    | 1.322325449     |
| 1.082566042  | 1.408769181   | 5.050480638  | 3.104126209   | 0.979160433    | 0.785414919     |
| 1.727945342  | 0.737933798   | 4.830380386  | 2.659070002   | 0.98960812     | 1.127543977     |
| 1.18282632   | 0.724507601   | 3.879652189  | 4.038283313   | 0.933903748    | 0.908606867     |
| 1.140646287  | 0.945509707   | 4.740965521  | 5.762327787   | 0.979417262    | 1.128875198     |
| 0.780442197  | 0.955219982   | 5.393396795  | 2.079171611   | 1.28532449     | 0.885927411     |
| 1.188010786  | 1.080253678   | 3.675292824  | 3.263318537   | 0.939971443    | 1.04884601      |
| 0.700259214  | 0.755568246   | 4.38171996   | 3.498196557   | 1.062651886    | 1.069814372     |

|             |             |             |             |             |             |
|-------------|-------------|-------------|-------------|-------------|-------------|
| 0.728775496 | 0.979405339 | 3.826218559 | 2.750268414 | 0.962282426 | 0.873565633 |
| 1.048945979 | 0.841761711 | 4.691810911 | 2.581681078 | 1.159675611 | 0.876500892 |
| 1.46320363  | 1.231223903 | 3.571411308 | 3.488452277 | 0.798416289 | 1.090201797 |
| 0.867466813 | 1.309937015 | 3.608989289 | 3.055638532 | 1.105917172 | 1.041817873 |
| 1.179239583 | 0.752962838 | 5.352915302 | 5.180443055 | 1.206178894 | 0.835436691 |
| 0.942756386 | 0.74642093  | 6.497004168 | 5.24426954  | 0.764610513 |             |
| 0.951369608 | 0.956517247 | 4.003079824 | 3.930723767 | 1.383194909 |             |
| 1.129026801 | 1.094307641 | 4.843805941 | 0.932766989 | 1.13156989  |             |
| 0.738047042 | 0.990873785 | 2.963443786 | 3.978434568 | 0.889759767 |             |
| 1.045921336 | 1.097962755 | 4.160537074 | 2.891646134 | 0.696038716 |             |
| 0.924942675 | 1.012115057 | 3.52970693  | 3.480488564 | 0.727866574 |             |
| 0.776381677 | 1.340926062 | 4.550717961 | 4.959384738 | 1.088241402 |             |
| 1.099168241 | 1.0952811   | 4.50311011  | 4.094235431 | 0.812530552 |             |
| 1.205228334 | 1.027572814 | 3.262696093 | 3.119818993 | 1.05301332  |             |
| 1.151310224 | 0.886622561 | 3.516888296 | 4.995145624 | 0.940514175 |             |
| 0.902944038 | 0.888194587 | 6.237343587 | 3.533980578 | 1.15592144  |             |
| 1.034085911 | 1.04733383  | 5.732577673 | 3.464327434 | 0.954274211 |             |
| 1.010096128 | 0.941941746 | 3.031207766 | 5.388491586 | 1.108709892 |             |
| 0.845166369 | 0.752616807 | 3.292282066 | 4.050319673 | 1.429688082 |             |
| 1.378256164 | 0.779665587 | 3.03374446  | 3.386992525 | 0.788036877 |             |
| 0.935824353 | 1.10532684  | 4.926507359 | 2.870226533 | 0.783394539 |             |
| 1.082245851 | 0.533009708 | 5.042589262 | 6.100266338 | 0.893562334 |             |
| 1.026388001 | 1.022330096 | 3.926908521 | 3.849642305 | 0.904057603 |             |
| 0.669188684 | 1.538991542 | 4.759250491 | 3.916054932 | 0.817627195 |             |
| 0.917827731 | 1.174511728 | 3.049227685 | 4.003530445 | 0.980573306 |             |
| 0.845301834 | 0.656217982 | 3.369889667 | 3.289835012 | 0.959956329 |             |
| 0.830203401 | 1.043628639 | 2.695940921 | 3.545661403 | 1.104294573 |             |
| 1.160622018 | 1.296433092 | 3.094287597 | 5.971367443 | 1.081288436 |             |
| 1.196916414 | 1.384122864 | 5.194780084 | 4.23193274  | 0.768995094 |             |
| 0.779853628 | 1.345631066 | 4.599890632 | 3.250809057 | 1.325394249 |             |
| 1.025581092 | 1.111242865 | 3.015589222 | 7.296116495 | 1.083760737 |             |
| 0.890429889 | 0.817657766 | 4.119689578 | 4.696927975 | 0.761276843 |             |
| 0.89001477  | 0.983600104 | 3.198787514 | 4.786165042 | 1.021214096 |             |
| 0.870340461 | 1.34137274  | 4.570225842 | 4.503013051 |             |             |
| 0.70564175  | 0.680246801 | 4.401387175 | 7.055923191 |             |             |
| 0.784984244 | 0.887000135 | 4.843938594 | 4.259874641 |             |             |
| 0.920039364 | 1.341133636 | 5.574674991 | 4.999099044 |             |             |
| 0.991928931 | 1.04280102  | 5.061959003 | 3.105534615 |             |             |
| 0.841166258 | 0.686192196 | 5.223531847 | 4.898974165 |             |             |
| 1.216285475 | 0.632808206 | 5.138994216 | 4.170676512 |             |             |
| 0.870024204 | 0.887751891 | 4.538148227 | 4.893203877 |             |             |
| 1.185198751 | 0.847556573 | 2.492958896 | 5.643150335 |             |             |
| 1.300255953 | 0.807276128 | 3.152250454 | 3.064759343 |             |             |

|             |             |             |             |
|-------------|-------------|-------------|-------------|
| 0.691696261 | 1.007051759 | 3.754040295 | 5.429651433 |
| 1.578520845 | 0.64772218  | 3.491718659 | 2.888758915 |
| 1.131987535 | 1.005907122 | 4.404190319 | 4.487397305 |
| 1.968539612 | 0.816171115 | 4.706578716 | 4.688694973 |
| 0.9031318   | 1.089709437 | 5.858964836 | 5.033346493 |
| 0.913206242 | 1.121646382 | 3.977253502 | 3.929747432 |
| 1.178445482 | 1.417341813 | 4.587261708 | 5.371948999 |
| 0.74729189  | 0.880575423 | 3.422602504 | 3.425242714 |
| 1.001466709 | 1.248452952 | 6.16591963  | 3.599048347 |
| 0.8211104   | 0.922355917 | 3.838834007 | 3.398536848 |
| 0.832262302 | 1.078436381 | 4.627131525 | 2.992483554 |
| 1.211462274 | 0.813889758 | 4.078492682 | 4.526850722 |
| 1.202743327 | 1.487658382 | 6.587753223 | 3.809106121 |
| 0.94696512  | 1.398410584 | 4.439200793 | 3.553565928 |
| 1.171215755 | 0.854411985 | 3.899268139 | 2.968812965 |
| 0.994313376 | 0.830921413 | 4.863377339 | 4.175311373 |
| 0.924442706 | 1.33172062  | 7.552550533 | 5.410939523 |
| 0.956727647 | 0.868803275 | 3.310674703 | 4.177967423 |
| 0.851660279 | 1.319064429 | 5.721662933 | 3.780110202 |
| 1.070331218 | 1.490898056 | 4.154809462 | 3.599327852 |
| 0.84732792  | 1.270351007 | 3.697770824 | 3.400057106 |
| 1.136358143 | 1.315417006 | 4.133838286 | 4.590022657 |
| 0.994313376 | 1.284466018 | 5.264688162 | 2.502722447 |
| 0.959591321 | 0.707354538 | 6.562468278 | 4.642227727 |
| 0.909086515 | 0.891531683 | 4.292908542 | 3.501205758 |
| 0.985078267 | 1.099542895 | 2.818168196 | 2.511905003 |
| 0.968008789 | 1.001331035 | 4.693379479 | 4.429193165 |
| 1.131987535 | 1.019761872 | 4.357103556 | 5.160800964 |
| 0.667324413 | 0.920333907 | 4.218299169 | 4.084601936 |
| 0.631077124 | 1.061393488 | 6.600548365 | 2.451677876 |
| 0.815846872 | 1.037952338 | 4.876632435 | 4.182748314 |
| 1.155109928 | 0.85286476  | 6.140879407 | 3.069235098 |
| 1.00167866  | 1.263117552 | 4.560788765 | 3.436036546 |
| 0.913542821 | 1.284466018 | 4.583060327 | 3.821738679 |
| 1.011166145 | 0.965448314 | 4.263615754 | 4.385981524 |
| 0.88657044  | 0.713592232 | 5.148636383 | 3.597056123 |
| 1.054898778 | 1.122348948 | 4.488297248 | 4.288459124 |
| 1.198168419 | 0.820117691 | 5.20102381  | 3.100435215 |
| 1.084705501 | 0.690715956 | 2.601473989 | 4.05774492  |
| 1.033306057 | 0.652536212 | 3.606043175 | 4.712788986 |
| 1.123517938 | 0.903312294 | 4.931794343 | 3.609937174 |
| 1.159085306 | 1.588681653 | 3.729490169 | 4.228989679 |
| 0.818846309 | 0.846055461 | 5.985376594 | 2.854368928 |

|             |             |             |             |
|-------------|-------------|-------------|-------------|
| 0.979383745 | 0.985436892 | 3.048183786 | 4.165387215 |
| 0.919270857 |             | 3.463586076 | 6.07950108  |
| 0.808211942 |             | 7.193641117 | 4.424271839 |
| 0.972433619 |             | 4.290071193 | 4.43515172  |
| 0.939869704 |             | 5.809100551 | 3.518747903 |
| 0.760446041 |             | 4.22254667  | 2.568932035 |
| 1.120862351 |             | 4.370068663 | 4.318784291 |
| 0.976869281 |             | 4.151342039 | 3.747778832 |
| 0.846599415 |             | 5.016166686 | 2.810590264 |
| 1.002142615 |             | 4.450998379 | 3.097159185 |
| 0.867428838 |             | 4.811718133 | 4.713161597 |
| 1.473056853 |             | 4.519141511 | 3.374871498 |
| 1.035497953 |             | 3.705808901 | 4.393052179 |
| 1.330792046 |             | 4.311221353 | 3.47561393  |
| 1.114505102 |             | 4.941714513 | 3.696453652 |
| 1.204267993 |             | 4.360941487 | 4.200070542 |
| 1.144141418 |             | 3.65517836  | 2.999999996 |
| 0.961533814 |             | 2.927079825 | 2.305451827 |
| 0.906209659 |             | 3.010559943 | 4.618304783 |
| 0.873508947 |             | 4.641833136 | 3.193124791 |
| 1.103515423 |             | 4.31138591  | 6.695620731 |
| 0.723137    |             | 6.091477732 | 3.368155335 |
| 0.870024204 |             | 4.123016719 | 3.45114535  |
| 1.038732873 |             | 4.362149002 | 4.470608997 |
| 1.130690522 |             | 3.437132656 | 2.768908781 |
| 1.124459105 |             | 3.932363508 | 2.163857847 |
| 0.898968257 |             | 3.880718223 | 5.041419523 |
| 1.016741497 |             | 3.952550064 | 4.269693134 |
| 0.986442821 |             | 3.704304732 | 4.186708855 |
| 1.25597479  |             | 3.939374897 | 3.225249101 |
| 0.922898603 |             | 5.113611646 | 4.07416565  |
| 1.223770308 |             | 4.961722191 | 2.729490288 |
| 1.16149881  |             | 4.990470174 | 2.387789392 |
| 1.418245435 |             | 3.989379275 | 4.232899377 |
| 0.936864158 |             | 3.902613356 | 4.755331842 |
| 0.849840492 |             | 3.771855434 | 3.6320459   |
| 0.747859633 |             | 4.385875437 | 3.705835377 |
| 0.688370798 |             | 3.56037424  | 2.048501839 |
| 1.029154545 |             | 6.004369803 | 3.32063658  |
| 0.92673868  |             | 4.271291699 | 3.885779549 |
| 0.839772    |             | 3.240725076 | 3.832341233 |
| 0.8677644   |             | 3.902210983 | 3.850587405 |
| 0.892852827 |             | 4.517851065 | 5.56601941  |

|             |             |             |
|-------------|-------------|-------------|
| 0.896282479 | 4.624713375 | 2.602294789 |
| 1.047301863 | 4.889235197 | 2.714722699 |
| 0.975552746 | 4.368458765 | 5.754407759 |
| 0.984843724 | 5.798416948 | 3.426438679 |
| 1.075698456 | 3.403216914 | 3.059364515 |
| 0.917827731 | 3.457430096 | 2.812946688 |
| 1.021992335 | 5.040768175 | 4.650652823 |
| 1.07079902  | 5.819822921 | 3.947670788 |
| 0.792343471 | 3.090604632 | 4.746147484 |
| 0.832448407 | 4.552425547 | 5.742834414 |
| 0.924175088 | 4.224921303 | 4.737784492 |
| 0.640017805 | 4.37899628  | 4.320476605 |
| 1.434419296 | 3.370856107 | 3.819596316 |
| 1.161012857 | 3.386572289 | 2.970873782 |
| 1.144533382 | 5.878330648 | 5.28897772  |
| 0.750425189 | 3.82266061  | 4.42751544  |
| 0.96045131  | 3.61323369  | 4.587378635 |
| 1.113630981 | 3.30712545  | 5.676666295 |
| 1.208557694 | 6.395317924 | 3.330903402 |
| 0.832932671 | 3.810763821 | 2.554817024 |
| 0.87479233  | 2.646432541 | 2.774271841 |
| 1.226070628 | 5.199024186 | 5.376085839 |
| 1.000566919 | 5.856078776 | 5.987484822 |
| 0.921444074 | 3.123379869 | 3.068157694 |
| 1.424080538 | 3.752125945 | 3.646226115 |
| 0.908385059 | 5.409920086 | 7.146653031 |
| 0.986442821 | 5.655516541 | 7.109669764 |
| 1.299609595 | 6.572449803 | 2.80865132  |
| 0.923850223 | 4.292168002 | 4.103155334 |
| 1.740048407 |             | 3.292903791 |
| 0.831403274 | 6.106806558 | 2.921124331 |
| 0.974483764 | 4.458927802 | 5.375995411 |
| 0.971402929 | 4.545432574 | 4.43029222  |
| 0.883834112 | 4.619732914 | 3.95404651  |
| 0.916497546 | 4.925391334 | 5.004065527 |
| 1.081679823 | 4.108950638 | 6.117823058 |
| 1.199489151 | 4.852249273 | 3.863632842 |
| 0.883834112 | 5.285731039 | 3.380950782 |
| 0.873287165 | 4.541593526 | 3.809106121 |
| 0.805271079 | 5.489730186 | 3.091046651 |
| 0.859351172 | 4.456515661 | 3.679233169 |
| 0.908300108 | 4.011247122 | 5.905848998 |
| 0.896282479 | 3.502694846 | 3.935069303 |

|             |             |             |
|-------------|-------------|-------------|
| 0.783977854 | 3.903600659 | 4.891528122 |
| 0.735290563 | 4.637569721 | 3.177598859 |
| 0.943391666 | 2.871153416 | 4.975859348 |
|             | 4.640129086 | 3.673378195 |
|             | 3.991307401 | 5.399570262 |
|             | 4.062393485 | 4.478899541 |
|             | 5.614946121 | 4.932614346 |
|             | 4.36323169  | 4.558377965 |
|             | 5.016605463 | 3.099984177 |
|             | 4.129969413 | 4.29827821  |
|             | 3.467904961 | 5.205467545 |
|             | 5.686486412 | 2.704138985 |
|             | 3.688683059 | 8.175407068 |
|             | 4.034894857 | 3.640565021 |
|             | 5.479771492 | 4.87122841  |
|             | 4.218965041 | 6.327605456 |
|             | 3.583111263 | 7.096821376 |
|             | 6.227947344 | 5.120055183 |
|             | 5.865074289 | 5.957556201 |
|             | 3.449527309 |             |
|             | 5.593942582 |             |
|             | 7.030950011 |             |
|             | 3.595535674 |             |
|             | 3.135741068 |             |
|             | 6.511979827 |             |
|             | 3.224800137 |             |
|             | 5.681790717 |             |
|             | 3.988715328 |             |
|             | 4.113460814 |             |
|             | 5.246260456 |             |
|             | 5.002834594 |             |
|             | 4.982823255 |             |
|             | 4.325626072 |             |
|             | 4.453637626 |             |
|             | 7.753358551 |             |
|             | 3.549421452 |             |
|             | 3.522433759 |             |
|             | 3.791785722 |             |
|             | 4.62344343  |             |
|             | 3.084400675 |             |
|             | 5.785096003 |             |
|             | 3.834186829 |             |
|             | 4.652636172 |             |

3.961019814  
3.745395675  
4.791871689  
4.385728186  
8.442513569  
4.579867669  
4.766391102  
2.050130671  
3.412659156  
4.675960198  
9.143111499  
4.624021829  
3.370553815  
5.185160121  
6.274673227  
4.415001529  
5.716225813  
9.178277313  
4.151122508  
2.278858763

| dr20 lgg-1 RNAi 50mM NaCl | dr20 lgg-1 RNAi 250mM NaCl |
|---------------------------|----------------------------|
| 0.948270232               | 1.265457858                |
| 1.273465733               | 1.313402875                |
| 2.083399907               | 1.058692818                |
| 1.427311691               | 1.219588384                |
| 1.328405022               | 1.176225241                |
| 1.002020209               | 0.960207623                |
| 1.265743284               | 1.177533612                |
| 0.905386152               | 1.580947905                |
| 0.886123504               | 1.552203397                |
| 0.869910838               | 1.275362243                |
| 1.068500906               | 1.254040033                |
| 2.062288626               | 1.093892645                |
| 1.028541638               | 1.141690523                |
| 1.20887728                | 1.359697754                |
| 1.208920209               | 1.876955172                |
| 1.169965671               | 1.1212932                  |
| 1.101293773               | 1.185152947                |
| 1.399802348               | 1.413960282                |
| 0.957941549               | 1.198560998                |
| 1.342135474               | 1.475831688                |
| 1.191164219               | 1.465116078                |
| 1.122887768               | 1.426816493                |
| 1.052923223               | 1.338251037                |
| 1.31212704                | 1.172831001                |
| 1.528519805               | 1.58287003                 |
| 1.175849444               | 1.320585547                |
| 0.902737663               | 0.910356258                |
| 1.298961886               | 1.053744775                |
| 1.063545914               | 1.330145971                |
| 1.356951255               | 1.352152338                |
| 1.142973013               | 1.308826558                |
| 0.972022269               | 1.184237996                |
| 1.442040608               | 1.42761182                 |
| 1.083516633               | 1.037079559                |
| 1.206178894               | 1.105711155                |
| 1.428858074               | 1.15131626                 |
| 1.223410021               | 1.17356618                 |
| 1.263615984               | 1.638118714                |
| 1.242729769               | 1.167632825                |
| 1.057504756               | 1.563134407                |
| 1.688650451               | 1.437225368                |
| 1.296029692               | 1.07439929                 |



|             |             |
|-------------|-------------|
| 1.14762652  | 1.20922361  |
| 0.9688978   | 1.044841391 |
| 1.087667867 | 1.148267425 |
| 1.181180367 | 1.024454242 |
| 1.068500906 | 1.414992047 |
| 1.298961886 | 1.15679115  |
| 0.984316973 | 1.105844389 |
| 1.361001856 | 1.185710928 |
| 0.892885675 | 1.103743577 |
| 1.258281654 | 1.091066738 |
| 1.251695078 | 1.052521482 |
| 1.137432946 | 1.085645151 |
| 1.063381896 | 1.178362861 |
| 1.443827523 | 1.588301151 |
| 0.975664705 | 1.03116883  |
| 1.380147003 | 1.273332956 |
| 0.955258467 | 1.37252712  |
| 0.962827012 | 1.201039511 |
| 1.449851397 | 1.211599813 |
| 1.100373728 | 1.098135598 |
| 1.215316613 | 1.208330645 |
| 0.976725839 | 1.627840427 |
| 1.683907051 | 1.075910848 |
| 1.331956907 | 1.385078253 |
| 1.184639985 | 1.485626046 |
| 1.044526052 | 1.573393887 |
| 1.173312984 | 1.128347357 |
| 1.220960498 | 1.213049036 |
| 1.306940767 | 1.4806073   |
| 1.075702811 | 1.2790805   |
| 1.50580295  | 1.076107397 |
| 1.069042275 | 1.146471574 |
| 1.174520655 | 1.108410437 |
| 1.055406532 | 1.399527653 |
| 1.108471665 | 1.432803136 |
| 1.486012397 |             |
| 1.058282299 |             |
| 1.120234943 |             |
| 1.2217626   |             |
| 1.233284037 |             |
| 0.852853763 |             |
| 1.24700341  |             |
| 1.057855271 |             |

1.326796783  
1.027159642  
1.488302093  
0.921680558  
1.104919431  
0.983350664  
1.122994142  
1.434647319  
1.174950961  
1.168698759  
1.007865697  
1.143610536  
1.100253835  
1.252451741  
1.153975251  
0.983499713  
1.076335273  
1.079070356  
1.034712286  
1.373901994  
1.154439316  
1.018374724  
1.333145093  
0.971347605  
1.116688202  
2.088116149  
1.033418896  
1.283169036  
1.067864956  
0.837347331
